# Supplementary material for: Reference Values for Body Composition and Anthropometric Measurements in Athletes
Source: PubMed Central journal article supplement (PMC4022746; doi:10.1371/journal.pone.0097846), 2014-05-15
Supplement: pone.0097846.s001.pdf [file pone.0097846.s001.pdf]

## Supporting Information 1 (SI1):

### Anthropometry variables percentiles by sport and sex

#### Contents

|                                                                                                                                                         |    |
|---------------------------------------------------------------------------------------------------------------------------------------------------------|----|
| Table 1 – Body weight (kg) percentiles by sport and sex .....                                                                                           | 1  |
| Table 2 – Height (cm) percentiles by sport and sex .....                                                                                                | 2  |
| Table 3 – Body mass index (kg/m <sup>2</sup> ) percentiles by sport and sex .....                                                                       | 3  |
| Table 4 – Sum of seven skinfolds [triceps + subscapular + biceps + suprailiac + abdominal + thigh + medial calf (mm)] percentiles by sport and sex..... | 4  |
| Table 5 – Sum of appendicular skinfolds [triceps + biceps + thigh + medial calf (mm)] percentiles by sport and ..                                       | 5  |
| Table 7 – Sum of leg skinfolds [thigh + medial calf (mm)] percentiles by sport and sex .....                                                            | 7  |
| Table 8 – Sum of trunk skinfolds [subscapular + suprailiac + abdominal (mm)] percentiles by sport and sex.....                                          | 8  |
| Table 9 – Arm circumference (cm) percentiles by sport and sex.....                                                                                      | 9  |
| Table 10 – Arm muscle circumference (cm) percentiles by sport and sex.....                                                                              | 10 |
| Table 11 – Thigh circumference (cm) percentiles by sport and sex.....                                                                                   | 11 |
| Table 12 – Thigh muscle circumference (cm) percentiles by sport and sex.....                                                                            | 12 |
| Table 13 – Calf circumference (cm) percentiles by sport and sex.....                                                                                    | 13 |
| Table 14 – Calf muscle circumference (cm) percentiles by sport and sex .....                                                                            | 14 |
| Table 15 – Abdominal circumference (cm) percentiles by sport and sex .....                                                                              | 15 |
| Table 16 – Hip circumference (cm) percentiles by sport and sex .....                                                                                    | 16 |

Table 1 – Body weight (kg) percentiles by sport and sex

| Sport                | 0.05  |              |       | 0.25  |              |       | Median |              |       | 0.75  |               |        | 0.95   |               |        |
|----------------------|-------|--------------|-------|-------|--------------|-------|--------|--------------|-------|-------|---------------|--------|--------|---------------|--------|
|                      | Low   | Estimate     | High  | Low   | Estimate     | High  | Low    | Estimate     | High  | Low   | Estimate      | High   | Low    | Estimate      | High   |
| <b>Females</b>       |       |              |       |       |              |       |        |              |       |       |               |        |        |               |        |
| Archery and Shooting | NA    | NA           | NA    | NA    | NA           | NA    | NA     | NA           | NA    | NA    | NA            | NA     | NA     | NA            | NA     |
| Athletics            | 42.49 | <b>48.54</b> | 53.56 | 50.43 | <b>54.80</b> | 58.76 | 55.94  | <b>59.16</b> | 62.37 | 59.56 | <b>63.51</b>  | 67.89  | 64.75  | <b>69.77</b>  | 75.82  |
| Basketball           | 47.24 | <b>54.32</b> | 60.25 | 57.73 | <b>62.81</b> | 67.42 | 65.03  | <b>68.71</b> | 72.40 | 70.00 | <b>74.61</b>  | 79.69  | 77.17  | <b>83.11</b>  | 90.18  |
| Fencing              | NA    | NA           | NA    | NA    | NA           | NA    | NA     | NA           | NA    | NA    | NA            | NA     | NA     | NA            | NA     |
| Gymnastics           | 35.66 | <b>43.30</b> | 49.45 | 43.87 | <b>49.42</b> | 54.36 | 49.58  | <b>53.67</b> | 57.77 | 52.99 | <b>57.93</b>  | 63.48  | 57.90  | <b>64.05</b>  | 71.69  |
| Handball             | NA    | NA           | NA    | NA    | NA           | NA    | NA     | NA           | NA    | NA    | NA            | NA     | NA     | NA            | NA     |
| Hockey Rink          | NA    | NA           | NA    | NA    | NA           | NA    | NA     | NA           | NA    | NA    | NA            | NA     | NA     | NA            | NA     |
| Korfball             | 37.76 | <b>48.23</b> | 56.53 | 46.73 | <b>54.51</b> | 61.40 | 52.97  | <b>58.87</b> | 64.77 | 56.35 | <b>63.24</b>  | 71.01  | 61.21  | <b>69.52</b>  | 79.98  |
| Modern Pentathlon    | 35.92 | <b>48.29</b> | 58.09 | 46.60 | <b>55.76</b> | 63.86 | 54.03  | <b>60.95</b> | 67.87 | 58.04 | <b>66.14</b>  | 75.30  | 63.81  | <b>73.61</b>  | 85.98  |
| Motorsport           | NA    | NA           | NA    | NA    | NA           | NA    | NA     | NA           | NA    | NA    | NA            | NA     | NA     | NA            | NA     |
| Other combat sports  | 39.87 | <b>48.44</b> | 55.32 | 48.50 | <b>54.77</b> | 60.35 | 54.50  | <b>59.17</b> | 63.84 | 57.99 | <b>63.57</b>  | 69.84  | 63.02  | <b>69.90</b>  | 78.47  |
| Rowing               | 43.62 | <b>54.80</b> | 63.68 | 52.81 | <b>61.17</b> | 68.59 | 59.20  | <b>65.60</b> | 72.01 | 62.61 | <b>70.03</b>  | 78.39  | 67.53  | <b>76.41</b>  | 87.58  |
| Rugby                | NA    | NA           | NA    | NA    | NA           | NA    | NA     | NA           | NA    | NA    | NA            | NA     | NA     | NA            | NA     |
| Sailing              | NA    | NA           | NA    | NA    | NA           | NA    | NA     | NA           | NA    | NA    | NA            | NA     | NA     | NA            | NA     |
| Soccer               | 41.64 | <b>48.98</b> | 54.95 | 50.05 | <b>55.37</b> | 60.14 | 55.89  | <b>59.82</b> | 63.74 | 59.50 | <b>64.26</b>  | 69.59  | 64.69  | <b>70.66</b>  | 78.00  |
| Surf                 | NA    | NA           | NA    | NA    | NA           | NA    | NA     | NA           | NA    | NA    | NA            | NA     | NA     | NA            | NA     |
| Swimming             | 43.45 | <b>49.61</b> | 54.68 | 50.91 | <b>55.38</b> | 59.41 | 56.09  | <b>59.39</b> | 62.69 | 59.37 | <b>63.40</b>  | 67.88  | 64.10  | <b>69.17</b>  | 75.33  |
| Tennis               | 43.34 | <b>53.20</b> | 61.08 | 52.27 | <b>59.58</b> | 66.06 | 58.49  | <b>64.01</b> | 69.53 | 61.95 | <b>68.44</b>  | 75.74  | 66.94  | <b>74.82</b>  | 84.68  |
| Triathlon            | 37.38 | <b>47.31</b> | 55.20 | 46.46 | <b>53.77</b> | 60.25 | 52.77  | <b>58.26</b> | 63.76 | 56.28 | <b>62.75</b>  | 70.07  | 61.33  | <b>69.21</b>  | 79.14  |
| Volleyball           | 40.29 | <b>52.05</b> | 61.45 | 52.57 | <b>61.08</b> | 68.63 | 61.10  | <b>67.36</b> | 73.62 | 66.09 | <b>73.64</b>  | 82.15  | 73.28  | <b>82.67</b>  | 94.43  |
| Wrestling and Judo   | 37.48 | <b>46.11</b> | 53.10 | 47.80 | <b>54.01</b> | 59.54 | 54.97  | <b>59.51</b> | 64.01 | 59.45 | <b>65.01</b>  | 71.18  | 65.88  | <b>72.91</b>  | 81.51  |
| <b>Males</b>         |       |              |       |       |              |       |        |              |       |       |               |        |        |               |        |
| Archery and Shooting | 41.70 | <b>58.63</b> | 71.01 | 55.50 | <b>67.45</b> | 77.55 | 65.08  | <b>73.59</b> | 82.09 | 69.63 | <b>79.72</b>  | 91.68  | 76.17  | <b>88.55</b>  | 105.48 |
| Athletics            | 55.77 | <b>62.83</b> | 68.53 | 64.40 | <b>69.44</b> | 73.92 | 70.41  | <b>74.03</b> | 77.66 | 74.15 | <b>78.62</b>  | 83.66  | 79.53  | <b>85.23</b>  | 92.29  |
| Basketball           | 57.13 | <b>65.17</b> | 71.87 | 69.26 | <b>74.95</b> | 80.09 | 77.70  | <b>81.76</b> | 85.81 | 83.42 | <b>88.56</b>  | 94.25  | 91.65  | <b>98.34</b>  | 106.38 |
| Fencing              | 47.92 | <b>60.40</b> | 69.73 | 58.98 | <b>67.81</b> | 75.35 | 66.67  | <b>72.96</b> | 79.26 | 70.57 | <b>78.11</b>  | 86.94  | 76.20  | <b>85.52</b>  | 98.00  |
| Gymnastics           | 44.43 | <b>53.99</b> | 61.43 | 54.58 | <b>61.33</b> | 67.22 | 61.63  | <b>66.44</b> | 71.24 | 65.66 | <b>71.54</b>  | 78.29  | 71.45  | <b>78.88</b>  | 88.44  |
| Handball             | 56.62 | <b>66.37</b> | 74.29 | 69.69 | <b>76.56</b> | 82.69 | 78.77  | <b>83.65</b> | 88.53 | 84.61 | <b>90.74</b>  | 97.61  | 93.01  | <b>100.93</b> | 110.68 |
| Hockey Rink          | 55.33 | <b>61.73</b> | 67.07 | 64.97 | <b>69.52</b> | 73.64 | 71.67  | <b>74.94</b> | 78.21 | 76.23 | <b>80.36</b>  | 84.91  | 82.80  | <b>88.15</b>  | 94.55  |
| Korfball             | 46.04 | <b>59.62</b> | 69.71 | 57.74 | <b>67.35</b> | 75.54 | 65.88  | <b>72.73</b> | 79.59 | 69.93 | <b>78.11</b>  | 87.72  | 75.76  | <b>85.85</b>  | 99.43  |
| Modern Pentathlon    | 43.31 | <b>55.86</b> | 65.34 | 55.09 | <b>63.94</b> | 71.54 | 63.28  | <b>69.56</b> | 75.84 | 67.59 | <b>75.18</b>  | 84.04  | 73.79  | <b>83.27</b>  | 95.82  |
| Motorsport           | NA    | NA           | NA    | NA    | NA           | NA    | NA     | NA           | NA    | NA    | NA            | NA     | NA     | NA            | NA     |
| Other combat sports  | 48.49 | <b>56.58</b> | 63.13 | 59.06 | <b>64.77</b> | 69.86 | 66.41  | <b>70.47</b> | 74.53 | 71.08 | <b>76.16</b>  | 81.88  | 77.81  | <b>84.36</b>  | 92.44  |
| Rowing               | 54.76 | <b>64.18</b> | 71.69 | 65.98 | <b>72.64</b> | 78.51 | 73.79  | <b>78.52</b> | 83.26 | 78.53 | <b>84.40</b>  | 91.06  | 85.35  | <b>92.86</b>  | 102.28 |
| Rugby                | 55.97 | <b>66.58</b> | 75.53 | 74.12 | <b>81.56</b> | 88.32 | 86.73  | <b>91.97</b> | 97.21 | 95.62 | <b>102.38</b> | 109.82 | 108.41 | <b>117.37</b> | 127.97 |
| Sailing              | 46.73 | <b>57.09</b> | 65.52 | 61.09 | <b>68.35</b> | 74.82 | 71.08  | <b>76.18</b> | 81.28 | 77.54 | <b>84.01</b>  | 91.27  | 86.84  | <b>95.27</b>  | 105.63 |
| Soccer               | 54.43 | <b>61.14</b> | 66.68 | 63.90 | <b>68.67</b> | 72.96 | 70.48  | <b>73.90</b> | 77.33 | 74.85 | <b>79.14</b>  | 83.91  | 81.13  | <b>86.67</b>  | 93.37  |
| Surf                 | NA    | NA           | NA    | NA    | NA           | NA    | NA     | NA           | NA    | NA    | NA            | NA     | NA     | NA            | NA     |
| Swimming             | 50.65 | <b>57.91</b> | 63.93 | 61.18 | <b>66.33</b> | 70.96 | 68.50  | <b>72.18</b> | 75.85 | 73.39 | <b>78.02</b>  | 83.17  | 80.42  | <b>86.44</b>  | 93.70  |
| Tennis               | 45.32 | <b>56.22</b> | 64.75 | 57.61 | <b>65.27</b> | 71.96 | 66.15  | <b>71.56</b> | 76.97 | 71.16 | <b>77.85</b>  | 85.51  | 78.37  | <b>86.90</b>  | 97.80  |
| Triathlon            | 52.60 | <b>57.34</b> | 61.26 | 59.16 | <b>62.55</b> | 65.60 | 63.73  | <b>66.17</b> | 68.62 | 66.74 | <b>69.79</b>  | 73.18  | 71.08  | <b>75.00</b>  | 79.74  |
| Volleyball           | 65.18 | <b>76.29</b> | 84.88 | 76.15 | <b>84.06</b> | 90.94 | 83.77  | <b>89.46</b> | 95.15 | 87.98 | <b>94.86</b>  | 102.77 | 94.04  | <b>102.63</b> | 113.74 |
| Wrestling and Judo   | 50.18 | <b>56.27</b> | 61.48 | 60.98 | <b>65.29</b> | 69.24 | 68.49  | <b>71.56</b> | 74.64 | 73.89 | <b>77.83</b>  | 82.15  | 81.65  | <b>86.85</b>  | 92.95  |

NA: data not presented for n &lt; 8.

Table 2 – Height (cm) percentiles by sport and sex

| Sport                | 0.05  |          |       | 0.25  |          |       | Median |          |       | 0.75  |          |       | 0.95  |          |       |
|----------------------|-------|----------|-------|-------|----------|-------|--------|----------|-------|-------|----------|-------|-------|----------|-------|
|                      | Low   | Estimate | High  | Low   | Estimate | High  | Low    | Estimate | High  | Low   | Estimate | High  | Low   | Estimate | High  |
| <b>Females</b>       |       |          |       |       |          |       |        |          |       |       |          |       |       |          |       |
| Archery and Shooting | NA    | NA       | NA    | NA    | NA       | NA    | NA     | NA       | NA    | NA    | NA       | NA    | NA    | NA       | NA    |
| Athletics            | 149.8 | 155.3    | 160.2 | 157.4 | 161.7    | 165.7 | 162.6  | 166.1    | 169.6 | 166.4 | 170.5    | 174.8 | 172.0 | 176.9    | 182.3 |
| Basketball           | 158.3 | 163.9    | 168.9 | 166.9 | 171.2    | 175.3 | 172.9  | 176.3    | 179.8 | 177.3 | 181.4    | 185.8 | 183.7 | 188.8    | 194.4 |
| Fencing              | NA    | NA       | NA    | NA    | NA       | NA    | NA     | NA       | NA    | NA    | NA       | NA    | NA    | NA       | NA    |
| Gymnastics           | 142.8 | 149.7    | 155.9 | 150.5 | 156.1    | 161.4 | 155.9  | 160.6    | 165.3 | 159.8 | 165.1    | 170.7 | 165.3 | 171.5    | 178.4 |
| Handball             | NA    | NA       | NA    | NA    | NA       | NA    | NA     | NA       | NA    | NA    | NA       | NA    | NA    | NA       | NA    |
| Hockey Rink          | NA    | NA       | NA    | NA    | NA       | NA    | NA     | NA       | NA    | NA    | NA       | NA    | NA    | NA       | NA    |
| Korfball             | 141.5 | 150.6    | 158.8 | 149.7 | 157.3    | 164.5 | 155.4  | 162.0    | 168.5 | 159.4 | 166.6    | 174.2 | 165.1 | 173.4    | 182.5 |
| Modern Pentathlon    | 149.3 | 158.3    | 166.5 | 157.3 | 164.8    | 172.0 | 162.9  | 169.4    | 175.9 | 166.8 | 174.0    | 181.5 | 172.3 | 180.5    | 189.5 |
| Motorsport           | NA    | NA       | NA    | NA    | NA       | NA    | NA     | NA       | NA    | NA    | NA       | NA    | NA    | NA       | NA    |
| Other combat sports  | 144.5 | 151.8    | 158.3 | 152.3 | 158.1    | 163.7 | 157.6  | 162.6    | 167.5 | 161.4 | 167.0    | 172.9 | 166.9 | 173.4    | 180.6 |
| Rowing               | 148.5 | 157.7    | 166.0 | 156.4 | 164.1    | 171.5 | 161.9  | 168.6    | 175.3 | 165.7 | 173.1    | 180.8 | 171.1 | 179.5    | 188.7 |
| Rugby                | NA    | NA       | NA    | NA    | NA       | NA    | NA     | NA       | NA    | NA    | NA       | NA    | NA    | NA       | NA    |
| Sailing              | NA    | NA       | NA    | NA    | NA       | NA    | NA     | NA       | NA    | NA    | NA       | NA    | NA    | NA       | NA    |
| Soccer               | 147.1 | 153.3    | 158.9 | 154.6 | 159.5    | 164.2 | 159.7  | 163.8    | 167.9 | 163.4 | 168.1    | 173.1 | 168.8 | 174.3    | 180.5 |
| Surf                 | NA    | NA       | NA    | NA    | NA       | NA    | NA     | NA       | NA    | NA    | NA       | NA    | NA    | NA       | NA    |
| Swimming             | 150.8 | 156.7    | 162.0 | 158.3 | 162.9    | 167.4 | 163.5  | 167.3    | 171.2 | 167.2 | 171.7    | 176.4 | 172.7 | 178.0    | 183.8 |
| Tennis               | 148.9 | 156.9    | 164.2 | 156.7 | 163.3    | 169.6 | 162.0  | 167.7    | 173.3 | 165.8 | 172.1    | 178.7 | 171.1 | 178.4    | 186.4 |
| Triathlon            | 148.1 | 156.5    | 164.0 | 156.1 | 163.0    | 169.5 | 161.7  | 167.6    | 173.4 | 165.6 | 172.1    | 179.0 | 171.1 | 178.6    | 187.0 |
| Volleyball           | 152.6 | 160.9    | 168.4 | 161.7 | 168.4    | 174.7 | 168.0  | 173.6    | 179.2 | 172.4 | 178.8    | 185.5 | 178.8 | 186.3    | 194.5 |
| Wrestling and Judo   | 144.8 | 150.9    | 156.5 | 152.5 | 157.4    | 162.1 | 157.9  | 161.9    | 166.0 | 161.8 | 166.4    | 171.4 | 167.4 | 172.9    | 179.1 |
| <b>Males</b>         |       |          |       |       |          |       |        |          |       |       |          |       |       |          |       |
| Archery and Shooting | 157.6 | 166.7    | 174.6 | 165.2 | 172.5    | 179.3 | 170.5  | 176.5    | 182.6 | 173.8 | 180.6    | 187.9 | 178.5 | 186.4    | 195.5 |
| Athletics            | 165.6 | 171.5    | 176.7 | 173.0 | 177.5    | 181.7 | 178.0  | 181.6    | 185.2 | 181.5 | 185.8    | 190.3 | 186.6 | 191.7    | 197.6 |
| Basketball           | 168.5 | 175.4    | 181.4 | 179.0 | 184.2    | 189.0 | 186.3  | 190.3    | 194.3 | 191.5 | 196.3    | 201.5 | 199.1 | 205.1    | 212.0 |
| Fencing              | 159.9 | 168.6    | 176.0 | 167.9 | 174.7    | 181.0 | 173.4  | 179.0    | 184.5 | 176.9 | 183.2    | 190.0 | 181.9 | 189.4    | 198.0 |
| Gymnastics           | 153.0 | 159.8    | 165.7 | 160.4 | 165.7    | 170.6 | 165.5  | 169.8    | 174.0 | 168.9 | 173.9    | 179.2 | 173.8 | 179.7    | 186.6 |
| Handball             | 166.6 | 172.2    | 177.1 | 174.1 | 178.4    | 182.3 | 179.3  | 182.6    | 186.0 | 182.9 | 186.9    | 191.2 | 188.1 | 193.0    | 198.6 |
| Hockey Rink          | 161.2 | 165.5    | 169.3 | 167.7 | 170.9    | 173.9 | 172.2  | 174.7    | 177.2 | 175.4 | 178.4    | 181.7 | 180.1 | 183.9    | 188.1 |
| Korfball             | 160.1 | 169.3    | 177.2 | 168.3 | 175.6    | 182.4 | 174.1  | 180.0    | 186.0 | 177.7 | 184.4    | 191.7 | 182.8 | 190.8    | 199.9 |
| Modern Pentathlon    | 158.4 | 166.2    | 173.0 | 165.9 | 172.1    | 177.8 | 171.2  | 176.2    | 181.2 | 174.5 | 180.3    | 186.4 | 179.4 | 186.1    | 194.0 |
| Motorsport           | NA    | NA       | NA    | NA    | NA       | NA    | NA     | NA       | NA    | NA    | NA       | NA    | NA    | NA       | NA    |
| Other combat sports  | 159.8 | 165.4    | 170.3 | 167.2 | 171.4    | 175.4 | 172.3  | 175.6    | 178.9 | 175.8 | 179.8    | 184.0 | 180.9 | 185.8    | 191.4 |
| Rowing               | 166.0 | 172.1    | 177.5 | 173.5 | 178.2    | 182.6 | 178.7  | 182.4    | 186.1 | 182.2 | 186.6    | 191.3 | 187.3 | 192.7    | 198.8 |
| Rugby                | 165.6 | 170.6    | 175.0 | 173.9 | 177.7    | 181.1 | 179.7  | 182.6    | 185.4 | 184.0 | 187.5    | 191.2 | 190.2 | 194.6    | 199.6 |
| Sailing              | 159.6 | 165.7    | 171.1 | 168.1 | 172.7    | 177.1 | 174.0  | 177.6    | 181.2 | 178.1 | 182.5    | 187.1 | 184.1 | 189.5    | 195.6 |
| Soccer               | 161.6 | 166.5    | 170.8 | 168.6 | 172.3    | 175.8 | 173.5  | 176.4    | 179.3 | 177.0 | 180.4    | 184.2 | 182.0 | 186.3    | 191.2 |
| Surf                 | NA    | NA       | NA    | NA    | NA       | NA    | NA     | NA       | NA    | NA    | NA       | NA    | NA    | NA       | NA    |
| Swimming             | 163.0 | 168.4    | 173.1 | 170.9 | 175.0    | 178.8 | 176.4  | 179.6    | 182.8 | 180.4 | 184.2    | 188.3 | 186.1 | 190.8    | 196.3 |
| Tennis               | 160.0 | 166.6    | 172.4 | 167.6 | 172.7    | 177.5 | 172.9  | 177.0    | 181.1 | 176.5 | 181.2    | 186.4 | 181.6 | 187.3    | 194.0 |
| Triathlon            | 161.0 | 165.9    | 170.1 | 167.9 | 171.6    | 175.0 | 172.7  | 175.6    | 178.5 | 176.1 | 179.6    | 183.3 | 181.0 | 185.3    | 190.2 |
| Volleyball           | 171.9 | 180.9    | 188.7 | 181.3 | 188.3    | 194.8 | 187.8  | 193.4    | 199.0 | 192.0 | 198.5    | 205.5 | 198.1 | 205.8    | 214.9 |
| Wrestling and Judo   | 158.0 | 162.1    | 165.8 | 165.2 | 168.3    | 171.2 | 170.2  | 172.6    | 174.9 | 174.0 | 176.9    | 179.9 | 179.4 | 183.0    | 187.2 |

NA: data not presented for n &lt; 8.

Table 3 – Body mass index (kg/m<sup>2</sup>) percentiles by sport and sex

| Sport                | 0.05  |              |       | 0.25  |              |       | Median |              |       | 0.75  |              |       | 0.95  |              |       |
|----------------------|-------|--------------|-------|-------|--------------|-------|--------|--------------|-------|-------|--------------|-------|-------|--------------|-------|
|                      | Low   | Estimate     | High  | Low   | Estimate     | High  | Low    | Estimate     | High  | Low   | Estimate     | High  | Low   | Estimate     | High  |
| <b>Females</b>       |       |              |       |       |              |       |        |              |       |       |              |       |       |              |       |
| Archery and Shooting | NA    | NA           | NA    | NA    | NA           | NA    | NA     | NA           | NA    | NA    | NA           | NA    | NA    | NA           | NA    |
| Athletics            | 17.32 | <b>18.60</b> | 19.76 | 19.21 | <b>20.22</b> | 21.18 | 20.52  | <b>21.34</b> | 22.16 | 21.51 | <b>22.46</b> | 23.47 | 22.92 | <b>24.08</b> | 25.37 |
| Basketball           | 17.59 | <b>18.89</b> | 20.06 | 19.72 | <b>20.72</b> | 21.68 | 21.20  | <b>22.00</b> | 22.80 | 22.32 | <b>23.27</b> | 24.28 | 23.94 | <b>25.11</b> | 26.40 |
| Fencing              | NA    | NA           | NA    | NA    | NA           | NA    | NA     | NA           | NA    | NA    | NA           | NA    | NA    | NA           | NA    |
| Gymnastics           | 16.12 | <b>17.78</b> | 19.28 | 18.15 | <b>19.48</b> | 20.75 | 19.56  | <b>20.67</b> | 21.78 | 20.58 | <b>21.85</b> | 23.19 | 22.06 | <b>23.56</b> | 25.21 |
| Handball             | NA    | NA           | NA    | NA    | NA           | NA    | NA     | NA           | NA    | NA    | NA           | NA    | NA    | NA           | NA    |
| Hockey Rink          | NA    | NA           | NA    | NA    | NA           | NA    | NA     | NA           | NA    | NA    | NA           | NA    | NA    | NA           | NA    |
| Korfball             | 17.12 | <b>19.27</b> | 21.25 | 19.22 | <b>21.02</b> | 22.74 | 20.68  | <b>22.23</b> | 23.78 | 21.72 | <b>23.44</b> | 25.24 | 23.21 | <b>25.18</b> | 27.34 |
| Modern Pentathlon    | 15.57 | <b>17.84</b> | 19.93 | 17.81 | <b>19.70</b> | 21.51 | 19.36  | <b>20.99</b> | 22.62 | 20.46 | <b>22.28</b> | 24.17 | 22.05 | <b>24.13</b> | 26.41 |
| Motorsport           | NA    | NA           | NA    | NA    | NA           | NA    | NA     | NA           | NA    | NA    | NA           | NA    | NA    | NA           | NA    |
| Other combat sports  | 17.31 | <b>19.19</b> | 20.89 | 19.47 | <b>21.00</b> | 22.46 | 20.98  | <b>22.26</b> | 23.54 | 22.06 | <b>23.52</b> | 25.04 | 23.62 | <b>25.33</b> | 27.20 |
| Rowing               | 17.73 | <b>19.93</b> | 21.94 | 19.78 | <b>21.62</b> | 23.39 | 21.20  | <b>22.80</b> | 24.40 | 22.20 | <b>23.97</b> | 25.82 | 23.65 | <b>25.67</b> | 27.86 |
| Rugby                | NA    | NA           | NA    | NA    | NA           | NA    | NA     | NA           | NA    | NA    | NA           | NA    | NA    | NA           | NA    |
| Sailing              | NA    | NA           | NA    | NA    | NA           | NA    | NA     | NA           | NA    | NA    | NA           | NA    | NA    | NA           | NA    |
| Soccer               | 17.56 | <b>19.17</b> | 20.62 | 19.66 | <b>20.94</b> | 22.16 | 21.12  | <b>22.17</b> | 23.23 | 22.19 | <b>23.40</b> | 24.69 | 23.72 | <b>25.18</b> | 26.78 |
| Surf                 | NA    | NA           | NA    | NA    | NA           | NA    | NA     | NA           | NA    | NA    | NA           | NA    | NA    | NA           | NA    |
| Swimming             | 16.91 | <b>18.32</b> | 19.59 | 18.87 | <b>19.98</b> | 21.04 | 20.22  | <b>21.13</b> | 22.04 | 21.23 | <b>22.28</b> | 23.40 | 22.67 | <b>23.94</b> | 25.35 |
| Tennis               | 17.67 | <b>19.65</b> | 21.45 | 19.72 | <b>21.36</b> | 22.92 | 21.15  | <b>22.55</b> | 23.94 | 22.17 | <b>23.74</b> | 25.37 | 23.63 | <b>25.45</b> | 27.42 |
| Triathlon            | 15.56 | <b>17.58</b> | 19.44 | 17.69 | <b>19.35</b> | 20.96 | 19.17  | <b>20.59</b> | 22.02 | 20.22 | <b>21.82</b> | 23.50 | 21.74 | <b>23.59</b> | 25.63 |
| Volleyball           | 17.29 | <b>19.08</b> | 20.71 | 19.40 | <b>20.85</b> | 22.24 | 20.87  | <b>22.09</b> | 23.30 | 21.94 | <b>23.32</b> | 24.77 | 23.47 | <b>25.09</b> | 26.89 |
| Wrestling and Judo   | 17.79 | <b>19.40</b> | 20.85 | 19.96 | <b>21.24</b> | 22.45 | 21.47  | <b>22.52</b> | 23.56 | 22.59 | <b>23.80</b> | 25.07 | 24.19 | <b>25.64</b> | 27.25 |
| <b>Males</b>         |       |              |       |       |              |       |        |              |       |       |              |       |       |              |       |
| Archery and Shooting | 13.06 | <b>18.62</b> | 22.67 | 17.58 | <b>21.50</b> | 24.79 | 20.71  | <b>23.49</b> | 26.27 | 22.19 | <b>25.49</b> | 29.41 | 24.31 | <b>28.36</b> | 33.93 |
| Athletics            | 17.73 | <b>19.54</b> | 21.00 | 19.93 | <b>21.22</b> | 22.37 | 21.45  | <b>22.39</b> | 23.32 | 22.40 | <b>23.55</b> | 24.85 | 23.77 | <b>25.23</b> | 27.04 |
| Basketball           | 17.63 | <b>19.24</b> | 20.60 | 20.02 | <b>21.17</b> | 22.22 | 21.68  | <b>22.52</b> | 23.35 | 22.81 | <b>23.86</b> | 25.01 | 24.44 | <b>25.79</b> | 27.40 |
| Fencing              | 16.02 | <b>19.34</b> | 21.83 | 18.92 | <b>21.28</b> | 23.31 | 20.94  | <b>22.63</b> | 24.33 | 21.96 | <b>23.98</b> | 26.34 | 23.43 | <b>25.92</b> | 29.24 |
| Gymnastics           | 15.54 | <b>18.79</b> | 21.32 | 18.98 | <b>21.28</b> | 23.28 | 21.37  | <b>23.00</b> | 24.63 | 22.73 | <b>24.73</b> | 27.03 | 24.69 | <b>27.21</b> | 30.47 |
| Handball             | 18.68 | <b>20.97</b> | 22.85 | 21.70 | <b>23.33</b> | 24.79 | 23.80  | <b>24.97</b> | 26.14 | 25.15 | <b>26.61</b> | 28.24 | 27.09 | <b>28.96</b> | 31.25 |
| Hockey Rink          | 18.86 | <b>20.71</b> | 22.26 | 21.63 | <b>22.95</b> | 24.15 | 23.55  | <b>24.51</b> | 25.46 | 24.87 | <b>26.07</b> | 27.39 | 26.75 | <b>28.31</b> | 30.16 |
| Korfball             | 14.70 | <b>18.60</b> | 21.49 | 18.03 | <b>20.79</b> | 23.14 | 20.35  | <b>22.32</b> | 24.29 | 21.50 | <b>23.85</b> | 26.60 | 23.15 | <b>26.04</b> | 29.94 |
| Modern Pentathlon    | 14.57 | <b>18.29</b> | 21.09 | 18.03 | <b>20.66</b> | 22.91 | 20.44  | <b>22.30</b> | 24.17 | 21.70 | <b>23.95</b> | 26.57 | 23.51 | <b>26.32</b> | 30.03 |
| Motorsport           | NA    | NA           | NA    | NA    | NA           | NA    | NA     | NA           | NA    | NA    | NA           | NA    | NA    | NA           | NA    |
| Other combat sports  | 16.85 | <b>19.05</b> | 20.83 | 19.69 | <b>21.25</b> | 22.63 | 21.66  | <b>22.77</b> | 23.89 | 22.91 | <b>24.30</b> | 25.86 | 24.72 | <b>26.50</b> | 28.70 |
| Rowing               | 17.88 | <b>20.14</b> | 21.94 | 20.52 | <b>22.13</b> | 23.54 | 22.36  | <b>23.51</b> | 24.66 | 23.48 | <b>24.89</b> | 26.50 | 25.08 | <b>26.89</b> | 29.14 |
| Rugby                | 17.52 | <b>20.48</b> | 22.98 | 22.55 | <b>24.64</b> | 26.53 | 26.05  | <b>27.52</b> | 29.00 | 28.51 | <b>30.41</b> | 32.49 | 32.06 | <b>34.56</b> | 37.53 |
| Sailing              | 17.29 | <b>19.68</b> | 21.63 | 20.53 | <b>22.22</b> | 23.74 | 22.79  | <b>23.99</b> | 25.20 | 24.25 | <b>25.76</b> | 27.45 | 26.36 | <b>28.31</b> | 30.69 |
| Soccer               | 18.85 | <b>20.53</b> | 21.93 | 21.18 | <b>22.39</b> | 23.48 | 22.81  | <b>23.68</b> | 24.56 | 23.88 | <b>24.97</b> | 26.18 | 25.44 | <b>26.83</b> | 28.52 |
| Surf                 | NA    | NA           | NA    | NA    | NA           | NA    | NA     | NA           | NA    | NA    | NA           | NA    | NA    | NA           | NA    |
| Swimming             | 17.52 | <b>19.14</b> | 20.50 | 19.84 | <b>21.00</b> | 22.05 | 21.45  | <b>22.29</b> | 23.13 | 22.53 | <b>23.58</b> | 24.74 | 24.08 | <b>25.44</b> | 27.06 |
| Tennis               | 15.58 | <b>18.58</b> | 20.94 | 18.92 | <b>21.04</b> | 22.90 | 21.25  | <b>22.75</b> | 24.26 | 22.61 | <b>24.46</b> | 26.59 | 24.57 | <b>26.93</b> | 29.93 |
| Triathlon            | 17.45 | <b>18.85</b> | 20.02 | 19.37 | <b>20.38</b> | 21.29 | 20.70  | <b>21.44</b> | 22.17 | 21.59 | <b>22.50</b> | 23.51 | 22.86 | <b>24.02</b> | 25.43 |
| Volleyball           | 18.30 | <b>20.85</b> | 22.82 | 20.79 | <b>22.61</b> | 24.19 | 22.53  | <b>23.84</b> | 25.15 | 23.48 | <b>25.06</b> | 26.88 | 24.85 | <b>26.82</b> | 29.37 |
| Wrestling and Judo   | 18.30 | <b>19.93</b> | 21.32 | 21.14 | <b>22.31</b> | 23.37 | 23.12  | <b>23.96</b> | 24.80 | 24.55 | <b>25.61</b> | 26.78 | 26.59 | <b>27.99</b> | 29.62 |

NA: data not presented for n &lt; 8.

**Table 4 – Sum of seven skinfolds [triceps + subscapular + biceps + suprailiac + abdominal + thigh + medial calf (mm)] percentiles by sport and sex**

| Sport                | 0.05  |              |        | 0.25  |               |        | Median |               |        | 0.75   |               |        | 0.95   |               |        |
|----------------------|-------|--------------|--------|-------|---------------|--------|--------|---------------|--------|--------|---------------|--------|--------|---------------|--------|
|                      | Low   | Estimate     | High   | Low   | Estimate      | High   | Low    | Estimate      | High   | Low    | Estimate      | High   | Low    | Estimate      | High   |
| <b>Females</b>       |       |              |        |       |               |        |        |               |        |        |               |        |        |               |        |
| Archery and Shooting | NA    | NA           | NA     | NA    | NA            | NA     | NA     | NA            | NA     | NA     | NA            | NA     | NA     | NA            | NA     |
| Athletics            | 1.71  | <b>27.21</b> | 48.22  | 35.86 | <b>53.97</b>  | 70.25  | 59.59  | <b>72.57</b>  | 85.55  | 74.90  | <b>91.18</b>  | 109.29 | 96.92  | <b>117.94</b> | 143.43 |
| Basketball           | 43.84 | <b>70.14</b> | 92.33  | 84.45 | <b>103.20</b> | 120.25 | 112.68 | <b>126.17</b> | 139.66 | 132.09 | <b>149.15</b> | 167.90 | 160.02 | <b>182.21</b> | 208.51 |
| Fencing              | NA    | NA           | NA     | NA    | NA            | NA     | NA     | NA            | NA     | NA     | NA            | NA     | NA     | NA            | NA     |
| Gymnastics           | 18.79 | <b>47.46</b> | 71.11  | 52.94 | <b>73.76</b>  | 92.52  | 76.68  | <b>92.04</b>  | 107.40 | 91.56  | <b>110.32</b> | 131.14 | 112.97 | <b>136.62</b> | 165.29 |
| Handball             | NA    | NA           | NA     | NA    | NA            | NA     | NA     | NA            | NA     | NA     | NA            | NA     | NA     | NA            | NA     |
| Hockey Rink          | NA    | NA           | NA     | NA    | NA            | NA     | NA     | NA            | NA     | NA     | NA            | NA     | NA     | NA            | NA     |
| Korfball             | 23.32 | <b>64.25</b> | 98.02  | 62.46 | <b>93.21</b>  | 121.02 | 89.67  | <b>113.34</b> | 137.01 | 105.66 | <b>133.47</b> | 164.22 | 128.66 | <b>162.42</b> | 203.36 |
| Modern Pentathlon    | 0.05  | <b>41.22</b> | 75.02  | 38.48 | <b>69.30</b>  | 97.14  | 65.18  | <b>88.82</b>  | 112.52 | 80.56  | <b>108.34</b> | 139.23 | 102.68 | <b>136.42</b> | 177.65 |
| Motorsport           | NA    | NA           | NA     | NA    | NA            | NA     | NA     | NA            | NA     | NA     | NA            | NA     | NA     | NA            | NA     |
| Other combat sports  | 12.71 | <b>53.82</b> | 87.53  | 54.74 | <b>85.16</b>  | 112.53 | 83.96  | <b>106.94</b> | 129.91 | 101.34 | <b>128.72</b> | 159.13 | 126.35 | <b>160.05</b> | 201.17 |
| Rowing               | 19.24 | <b>58.85</b> | 91.47  | 55.78 | <b>85.70</b>  | 112.71 | 81.17  | <b>104.36</b> | 127.48 | 95.94  | <b>123.02</b> | 152.87 | 117.18 | <b>149.87</b> | 189.41 |
| Rugby                | NA    | NA           | NA     | NA    | NA            | NA     | NA     | NA            | NA     | NA     | NA            | NA     | NA     | NA            | NA     |
| Sailing              | NA    | NA           | NA     | NA    | NA            | NA     | NA     | NA            | NA     | NA     | NA            | NA     | NA     | NA            | NA     |
| Soccer               | 31.47 | <b>59.08</b> | 82.01  | 66.41 | <b>86.42</b>  | 104.50 | 90.71  | <b>105.42</b> | 120.13 | 106.34 | <b>124.42</b> | 144.42 | 128.83 | <b>151.76</b> | 179.37 |
| Surf                 | NA    | NA           | NA     | NA    | NA            | NA     | NA     | NA            | NA     | NA     | NA            | NA     | NA     | NA            | NA     |
| Swimming             | 22.57 | <b>47.92</b> | 68.95  | 56.64 | <b>74.81</b>  | 91.20  | 80.32  | <b>93.50</b>  | 106.67 | 95.79  | <b>112.19</b> | 130.35 | 118.05 | <b>139.08</b> | 164.42 |
| Tennis               | 51.97 | <b>90.25</b> | 122.02 | 89.31 | <b>118.17</b> | 144.37 | 115.26 | <b>137.58</b> | 159.90 | 130.79 | <b>156.99</b> | 185.85 | 153.13 | <b>184.91</b> | 223.18 |
| Triathlon            | 0.00  | <b>35.11</b> | 74.53  | 30.27 | <b>66.54</b>  | 99.11  | 60.50  | <b>88.38</b>  | 116.20 | 77.59  | <b>110.22</b> | 146.43 | 102.17 | <b>141.65</b> | 189.92 |
| Volleyball           | 30.00 | <b>65.10</b> | 94.04  | 70.08 | <b>95.76</b>  | 118.93 | 97.93  | <b>117.08</b> | 136.23 | 115.23 | <b>138.39</b> | 164.08 | 140.11 | <b>169.06</b> | 204.15 |
| Wrestling and Judo   | 29.14 | <b>64.21</b> | 93.23  | 73.03 | <b>98.38</b>  | 121.24 | 103.53 | <b>122.12</b> | 140.71 | 123.00 | <b>145.87</b> | 171.22 | 151.02 | <b>180.04</b> | 215.11 |
| <b>Males</b>         |       |              |        |       |               |        |        |               |        |        |               |        |        |               |        |
| Archery and Shooting | 0.00  | <b>45.84</b> | 81.12  | 35.95 | <b>71.63</b>  | 99.16  | 67.40  | <b>89.55</b>  | 111.70 | 79.95  | <b>107.48</b> | 143.15 | 97.99  | <b>133.26</b> | 188.40 |
| Athletics            | 7.61  | <b>24.49</b> | 37.06  | 26.82 | <b>38.14</b>  | 47.68  | 40.18  | <b>47.62</b>  | 55.06  | 47.56  | <b>57.11</b>  | 68.42  | 58.18  | <b>70.75</b>  | 87.64  |
| Basketball           | 15.76 | <b>34.38</b> | 49.40  | 44.34 | <b>56.96</b>  | 68.10  | 64.20  | <b>72.65</b>  | 81.09  | 77.20  | <b>88.34</b>  | 100.96 | 95.90  | <b>110.91</b> | 129.53 |
| Fencing              | 0.00  | <b>29.49</b> | 54.55  | 25.67 | <b>50.06</b>  | 69.48  | 48.81  | <b>64.36</b>  | 79.86  | 59.19  | <b>78.66</b>  | 103.00 | 74.12  | <b>99.23</b>  | 136.29 |
| Gymnastics           | 0.00  | <b>25.93</b> | 44.99  | 28.09 | <b>45.51</b>  | 59.98  | 47.83  | <b>59.12</b>  | 70.40  | 58.25  | <b>72.72</b>  | 90.14  | 73.24  | <b>92.30</b>  | 118.53 |
| Handball             | 1.54  | <b>40.30</b> | 68.27  | 42.61 | <b>68.36</b>  | 89.66  | 71.16  | <b>87.87</b>  | 104.53 | 86.03  | <b>107.38</b> | 133.08 | 107.42 | <b>135.45</b> | 174.15 |
| Hockey Rink          | 13.78 | <b>35.45</b> | 52.93  | 47.38 | <b>62.04</b>  | 74.99  | 70.73  | <b>80.53</b>  | 90.32  | 86.06  | <b>99.01</b>  | 113.67 | 108.12 | <b>125.60</b> | 147.27 |
| Korfball             | 0.00  | <b>31.84</b> | 54.49  | 27.59 | <b>49.89</b>  | 67.41  | 48.48  | <b>62.43</b>  | 76.39  | 57.46  | <b>74.98</b>  | 97.28  | 70.38  | <b>93.03</b>  | 127.32 |
| Modern Pentathlon    | 0.00  | <b>26.60</b> | 47.24  | 25.03 | <b>44.69</b>  | 60.60  | 44.66  | <b>57.27</b>  | 69.89  | 53.95  | <b>69.85</b>  | 89.52  | 67.31  | <b>87.95</b>  | 117.76 |
| Motorsport           | NA    | NA           | NA     | NA    | NA            | NA     | NA     | NA            | NA     | NA     | NA            | NA     | NA     | NA            | NA     |
| Other combat sports  | 8.25  | <b>29.57</b> | 45.81  | 34.91 | <b>49.22</b>  | 61.43  | 53.44  | <b>62.89</b>  | 72.29  | 64.30  | <b>76.55</b>  | 90.82  | 79.92  | <b>96.21</b>  | 117.48 |
| Rowing               | 7.66  | <b>28.92</b> | 45.04  | 33.52 | <b>47.77</b>  | 59.92  | 51.49  | <b>60.88</b>  | 70.27  | 61.83  | <b>73.98</b>  | 88.24  | 76.71  | <b>92.83</b>  | 114.09 |
| Rugby                | 0.00  | <b>18.39</b> | 49.55  | 46.93 | <b>72.38</b>  | 94.98  | 93.24  | <b>109.90</b> | 126.55 | 124.82 | <b>147.42</b> | 172.87 | 170.25 | <b>201.40</b> | 239.49 |
| Sailing              | 2.03  | <b>33.14</b> | 57.53  | 45.37 | <b>66.20</b>  | 84.32  | 75.49  | <b>89.19</b>  | 102.94 | 94.11  | <b>112.17</b> | 133.07 | 120.90 | <b>145.24</b> | 176.41 |
| Soccer               | 15.13 | <b>35.48</b> | 50.17  | 35.59 | <b>49.24</b>  | 60.59  | 49.82  | <b>58.81</b>  | 67.84  | 57.06  | <b>68.38</b>  | 82.06  | 67.49  | <b>82.14</b>  | 102.52 |
| Surf                 | NA    | NA           | NA     | NA    | NA            | NA     | NA     | NA            | NA     | NA     | NA            | NA     | NA     | NA            | NA     |
| Swimming             | 7.37  | <b>24.27</b> | 37.72  | 32.15 | <b>43.54</b>  | 53.52  | 49.37  | <b>56.93</b>  | 64.50  | 60.35  | <b>70.33</b>  | 81.72  | 76.15  | <b>89.60</b>  | 106.50 |
| Tennis               | 14.61 | <b>38.53</b> | 56.02  | 39.79 | <b>55.83</b>  | 69.25  | 57.30  | <b>67.85</b>  | 78.45  | 66.50  | <b>79.88</b>  | 95.96  | 79.73  | <b>97.17</b>  | 121.14 |
| Triathlon            | 16.03 | <b>28.82</b> | 38.82  | 32.78 | <b>41.47</b>  | 49.02  | 44.42  | <b>50.26</b>  | 56.10  | 51.51  | <b>59.05</b>  | 67.75  | 61.70  | <b>71.70</b>  | 84.49  |
| Volleyball           | 9.60  | <b>37.69</b> | 57.84  | 38.01 | <b>56.75</b>  | 72.24  | 57.76  | <b>70.00</b>  | 82.25  | 67.77  | <b>83.26</b>  | 102.00 | 82.17  | <b>102.32</b> | 130.41 |
| Wrestling and Judo   | 6.59  | <b>21.99</b> | 34.72  | 33.74 | <b>44.17</b>  | 53.50  | 52.62  | <b>59.58</b>  | 66.55  | 65.67  | <b>75.00</b>  | 85.42  | 84.45  | <b>97.18</b>  | 112.58 |

NA: data not presented for n < 8.

**Table 5 – Sum of appendicular skinfolds [triceps + biceps + thigh + medial calf (mm)] percentiles by sport and sex**

| Sport                | 0.05  |          |       | 0.25  |          |       | Median |          |       | 0.75  |          |        | 0.95  |          |        |
|----------------------|-------|----------|-------|-------|----------|-------|--------|----------|-------|-------|----------|--------|-------|----------|--------|
|                      | Low   | Estimate | High  | Low   | Estimate | High  | Low    | Estimate | High  | Low   | Estimate | High   | Low   | Estimate | High   |
| <b>Females</b>       |       |          |       |       |          |       |        |          |       |       |          |        |       |          |        |
| Archery and Shooting | NA    | NA       | NA    | NA    | NA       | NA    | NA     | NA       | NA    | NA    | NA       | NA     | NA    | NA       | NA     |
| Athletics            | 0.00  | 10.62    | 23.06 | 15.14 | 25.93    | 35.42 | 29.13  | 36.57    | 44.01 | 37.72 | 47.21    | 58.00  | 50.08 | 62.52    | 78.13  |
| Basketball           | 18.69 | 34.51    | 47.56 | 42.39 | 53.44    | 63.36 | 58.86  | 66.60    | 74.35 | 69.84 | 79.76    | 90.82  | 85.64 | 98.70    | 114.51 |
| Fencing              | NA    | NA       | NA    | NA    | NA       | NA    | NA     | NA       | NA    | NA    | NA       | NA     | NA    | NA       | NA     |
| Gymnastics           | 10.29 | 28.44    | 42.82 | 30.90 | 43.74    | 55.01 | 45.23  | 54.38    | 63.49 | 53.71 | 65.02    | 77.82  | 65.91 | 80.32    | 98.44  |
| Handball             | NA    | NA       | NA    | NA    | NA       | NA    | NA     | NA       | NA    | NA    | NA       | NA     | NA    | NA       | NA     |
| Hockey Rink          | NA    | NA       | NA    | NA    | NA       | NA    | NA     | NA       | NA    | NA    | NA       | NA     | NA    | NA       | NA     |
| Korfball             | 10.52 | 34.51    | 53.26 | 32.37 | 49.76    | 65.00 | 47.55  | 60.36    | 73.17 | 55.71 | 70.96    | 88.35  | 67.45 | 86.21    | 110.19 |
| Modern Pentathlon    | 0.84  | 24.51    | 42.91 | 21.80 | 38.94    | 53.93 | 36.37  | 48.98    | 61.59 | 44.02 | 59.01    | 76.16  | 55.04 | 73.44    | 97.11  |
| Motorsport           | NA    | NA       | NA    | NA    | NA       | NA    | NA     | NA       | NA    | NA    | NA       | NA     | NA    | NA       | NA     |
| Other combat sports  | 2.97  | 27.67    | 46.92 | 27.06 | 44.71    | 60.12 | 43.80  | 56.55    | 69.30 | 52.97 | 68.39    | 86.04  | 66.18 | 85.43    | 110.13 |
| Rowing               | 8.44  | 32.17    | 50.71 | 29.31 | 46.59    | 61.75 | 43.81  | 56.62    | 69.43 | 51.49 | 66.65    | 83.93  | 62.54 | 81.07    | 104.80 |
| Rugby                | NA    | NA       | NA    | NA    | NA       | NA    | NA     | NA       | NA    | NA    | NA       | NA     | NA    | NA       | NA     |
| Sailing              | NA    | NA       | NA    | NA    | NA       | NA    | NA     | NA       | NA    | NA    | NA       | NA     | NA    | NA       | NA     |
| Soccer               | 15.08 | 31.99    | 45.58 | 35.61 | 47.56    | 58.15 | 49.88  | 58.38    | 66.88 | 58.61 | 69.20    | 81.15  | 71.17 | 84.76    | 101.68 |
| Surf                 | NA    | NA       | NA    | NA    | NA       | NA    | NA     | NA       | NA    | NA    | NA       | NA     | NA    | NA       | NA     |
| Swimming             | 11.66 | 26.17    | 37.87 | 30.38 | 40.57    | 49.59 | 43.39  | 50.58    | 57.74 | 51.54 | 60.59    | 70.76  | 63.27 | 74.99    | 89.48  |
| Tennis               | 29.68 | 51.05    | 67.95 | 49.43 | 65.05    | 78.84 | 63.15  | 74.78    | 86.41 | 70.72 | 84.51    | 100.13 | 81.61 | 98.51    | 119.88 |
| Triathlon            | 0.00  | 18.80    | 39.48 | 14.95 | 34.38    | 51.26 | 30.95  | 45.21    | 59.45 | 39.14 | 56.05    | 75.45  | 50.92 | 71.63    | 98.46  |
| Volleyball           | 7.90  | 31.17    | 49.49 | 33.39 | 49.86    | 64.28 | 51.11  | 62.85    | 74.55 | 61.38 | 75.84    | 92.27  | 76.17 | 94.54    | 117.76 |
| Wrestling and Judo   | 11.62 | 33.74    | 51.38 | 38.13 | 53.69    | 67.42 | 56.56  | 67.56    | 78.57 | 67.70 | 81.43    | 96.99  | 83.74 | 101.38   | 123.50 |
| <b>Males</b>         |       |          |       |       |          |       |        |          |       |       |          |        |       |          |        |
| Archery and Shooting | 1.42  | 22.75    | 36.30 | 18.70 | 32.50    | 43.10 | 30.71  | 39.27    | 47.83 | 35.44 | 46.05    | 59.84  | 42.24 | 55.79    | 77.12  |
| Athletics            | 4.53  | 11.28    | 16.29 | 12.14 | 16.67    | 20.48 | 17.43  | 20.42    | 23.39 | 20.35 | 24.17    | 28.68  | 24.54 | 29.56    | 36.29  |
| Basketball           | 9.05  | 17.23    | 23.82 | 21.54 | 27.09    | 31.98 | 30.22  | 33.94    | 37.66 | 35.90 | 40.79    | 46.34  | 44.06 | 50.65    | 58.83  |
| Fencing              | 0.00  | 11.13    | 23.27 | 9.29  | 21.21    | 30.47 | 20.92  | 28.21    | 35.48 | 25.92 | 35.21    | 47.11  | 33.13 | 45.28    | 63.84  |
| Gymnastics           | 1.51  | 12.99    | 21.30 | 13.84 | 21.46    | 27.77 | 22.42  | 27.34    | 32.27 | 26.92 | 33.23    | 40.84  | 33.39 | 41.70    | 53.17  |
| Handball             | 1.51  | 17.44    | 28.91 | 18.29 | 28.86    | 37.58 | 29.96  | 36.79    | 43.61 | 35.99 | 44.72    | 55.28  | 44.67 | 56.13    | 72.07  |
| Hockey Rink          | 2.00  | 13.26    | 22.31 | 19.49 | 27.05    | 33.72 | 31.65  | 36.64    | 41.65 | 39.57 | 46.22    | 53.81  | 50.98 | 60.01    | 71.30  |
| Korfball             | 0.00  | 14.31    | 23.79 | 12.39 | 21.80    | 29.14 | 21.17  | 27.02    | 32.85 | 24.88 | 32.23    | 41.63  | 30.22 | 39.73    | 54.25  |
| Modern Pentathlon    | 0.00  | 9.60     | 20.51 | 8.74  | 19.18    | 27.52 | 19.27  | 25.83    | 32.40 | 24.14 | 32.49    | 42.92  | 31.15 | 42.06    | 58.07  |
| Motorsport           | NA    | NA       | NA    | NA    | NA       | NA    | NA     | NA       | NA    | NA    | NA       | NA     | NA    | NA       | NA     |
| Other combat sports  | 0.00  | 9.13     | 19.44 | 12.65 | 21.70    | 29.37 | 24.61  | 30.44    | 36.27 | 31.51 | 39.18    | 48.23  | 41.44 | 51.76    | 65.44  |
| Rowing               | 1.81  | 11.95    | 19.61 | 14.12 | 20.88    | 26.64 | 22.68  | 27.10    | 31.53 | 27.57 | 33.31    | 40.09  | 34.61 | 42.25    | 52.40  |
| Rugby                | 0.00  | 2.68     | 17.55 | 16.34 | 28.47    | 39.20 | 38.52  | 46.39    | 54.25 | 53.58 | 64.31    | 76.44  | 75.23 | 90.10    | 108.35 |
| Sailing              | 0.00  | 9.32     | 22.39 | 15.96 | 27.15    | 36.77 | 32.31  | 39.54    | 46.77 | 42.30 | 51.93    | 63.11  | 56.68 | 69.76    | 86.62  |
| Soccer               | 3.73  | 13.70    | 20.80 | 13.74 | 20.37    | 25.83 | 20.70  | 25.01    | 29.32 | 24.20 | 29.65    | 36.28  | 29.23 | 36.33    | 46.30  |
| Surf                 | NA    | NA       | NA    | NA    | NA       | NA    | NA     | NA       | NA    | NA    | NA       | NA     | NA    | NA       | NA     |
| Swimming             | 5.70  | 12.80    | 18.45 | 16.03 | 20.84    | 25.04 | 23.21  | 26.42    | 29.62 | 27.79 | 32.01    | 36.80  | 34.39 | 40.05    | 47.14  |
| Tennis               | 9.13  | 19.09    | 26.33 | 19.50 | 26.18    | 31.75 | 26.71  | 31.11    | 35.52 | 30.47 | 36.04    | 42.72  | 35.89 | 43.14    | 53.09  |
| Triathlon            | 7.37  | 13.30    | 17.92 | 15.11 | 19.13    | 22.62 | 20.49  | 23.19    | 25.88 | 23.76 | 27.24    | 31.27  | 28.45 | 33.08    | 39.01  |
| Volleyball           | 0.00  | 12.97    | 22.29 | 13.11 | 21.83    | 28.94 | 22.38  | 27.98    | 33.57 | 27.01 | 34.14    | 42.84  | 33.66 | 43.00    | 56.19  |
| Wrestling and Judo   | 4.22  | 10.78    | 16.19 | 15.74 | 20.19    | 24.16 | 23.75  | 26.73    | 29.70 | 29.29 | 33.27    | 37.70  | 37.25 | 42.68    | 49.22  |

NA: data not presented for n < 8.

Table 6 – Sum of arm skinfolds [triceps + biceps (mm)] percentiles by sport and sex

| Sport                | 0.05 |              |       | 0.25  |              |       | Median |              |       | 0.75  |              |       | 0.95  |              |       |
|----------------------|------|--------------|-------|-------|--------------|-------|--------|--------------|-------|-------|--------------|-------|-------|--------------|-------|
|                      | Low  | Estimate     | High  | Low   | Estimate     | High  | Low    | Estimate     | High  | Low   | Estimate     | High  | Low   | Estimate     | High  |
| <b>Females</b>       |      |              |       |       |              |       |        |              |       |       |              |       |       |              |       |
| Archery and Shooting | NA   | NA           | NA    | NA    | NA           | NA    | NA     | NA           | NA    | NA    | NA           | NA    | NA    | NA           | NA    |
| Athletics            | 0,00 | <b>4,20</b>  | 8,91  | 6,05  | <b>10,11</b> | 13,73 | 11,38  | <b>14,22</b> | 17,08 | 14,73 | <b>18,33</b> | 22,40 | 19,55 | <b>24,25</b> | 30,06 |
| Basketball           | 4,79 | <b>10,88</b> | 15,95 | 14,11 | <b>18,39</b> | 22,24 | 20,60  | <b>23,61</b> | 26,62 | 24,97 | <b>28,83</b> | 33,10 | 31,27 | <b>36,34</b> | 42,43 |
| Fencing              | NA   | NA           | NA    | NA    | NA           | NA    | NA     | NA           | NA    | NA    | NA           | NA    | NA    | NA           | NA    |
| Gymnastics           | 0,12 | <b>7,95</b>  | 14,25 | 9,32  | <b>14,89</b> | 19,82 | 15,72  | <b>19,71</b> | 23,70 | 19,59 | <b>24,54</b> | 30,10 | 25,17 | <b>31,48</b> | 39,29 |
| Handball             | NA   | NA           | NA    | NA    | NA           | NA    | NA     | NA           | NA    | NA    | NA           | NA    | NA    | NA           | NA    |
| Hockey Rink          | NA   | NA           | NA    | NA    | NA           | NA    | NA     | NA           | NA    | NA    | NA           | NA    | NA    | NA           | NA    |
| Korfball             | 3,67 | <b>13,40</b> | 21,24 | 12,81 | <b>19,99</b> | 26,39 | 19,15  | <b>24,56</b> | 29,97 | 22,74 | <b>29,14</b> | 36,32 | 27,89 | <b>35,72</b> | 45,45 |
| Modern Pentathlon    | 0,00 | <b>9,38</b>  | 17,19 | 8,52  | <b>15,72</b> | 22,11 | 14,71  | <b>20,12</b> | 25,53 | 18,13 | <b>24,53</b> | 31,72 | 23,06 | <b>30,86</b> | 40,62 |
| Motorsport           | NA   | NA           | NA    | NA    | NA           | NA    | NA     | NA           | NA    | NA    | NA           | NA    | NA    | NA           | NA    |
| Other combat sports  | 0,17 | <b>10,34</b> | 18,47 | 10,38 | <b>17,76</b> | 24,31 | 17,48  | <b>22,93</b> | 28,37 | 21,54 | <b>28,09</b> | 35,47 | 27,38 | <b>35,52</b> | 45,68 |
| Rowing               | 1,93 | <b>11,79</b> | 19,70 | 10,88 | <b>18,18</b> | 24,68 | 17,10  | <b>22,63</b> | 28,14 | 20,56 | <b>27,07</b> | 34,36 | 25,53 | <b>33,46</b> | 43,30 |
| Rugby                | NA   | NA           | NA    | NA    | NA           | NA    | NA     | NA           | NA    | NA    | NA           | NA    | NA    | NA           | NA    |
| Sailing              | NA   | NA           | NA    | NA    | NA           | NA    | NA     | NA           | NA    | NA    | NA           | NA    | NA    | NA           | NA    |
| Soccer               | 3,33 | <b>9,57</b>  | 14,65 | 11,13 | <b>15,57</b> | 19,53 | 16,55  | <b>19,74</b> | 22,93 | 19,94 | <b>23,91</b> | 28,35 | 24,82 | <b>29,91</b> | 36,15 |
| Surf                 | NA   | NA           | NA    | NA    | NA           | NA    | NA     | NA           | NA    | NA    | NA           | NA    | NA    | NA           | NA    |
| Swimming             | 1,79 | <b>7,86</b>  | 12,80 | 9,84  | <b>14,12</b> | 17,93 | 15,44  | <b>18,47</b> | 21,50 | 19,00 | <b>22,82</b> | 27,10 | 24,13 | <b>29,08</b> | 35,15 |
| Tennis               | 9,46 | <b>18,82</b> | 26,39 | 18,42 | <b>25,36</b> | 31,55 | 24,65  | <b>29,90</b> | 35,13 | 28,24 | <b>34,45</b> | 41,36 | 33,40 | <b>40,98</b> | 50,33 |
| Triathlon            | 0,00 | <b>6,20</b>  | 15,30 | 4,88  | <b>13,31</b> | 20,76 | 11,94  | <b>18,25</b> | 24,56 | 15,73 | <b>23,20</b> | 31,61 | 21,20 | <b>30,31</b> | 41,76 |
| Volleyball           | 2,75 | <b>10,77</b> | 17,24 | 11,78 | <b>17,54</b> | 22,66 | 18,05  | <b>22,24</b> | 26,43 | 21,82 | <b>26,94</b> | 32,70 | 27,24 | <b>33,71</b> | 41,73 |
| Wrestling and Judo   | 1,60 | <b>10,28</b> | 17,32 | 12,32 | <b>18,47</b> | 23,95 | 19,76  | <b>24,17</b> | 28,57 | 24,38 | <b>29,86</b> | 36,02 | 31,02 | <b>38,05</b> | 46,73 |
| <b>Males</b>         |      |              |       |       |              |       |        |              |       |       |              |       |       |              |       |
| Archery and Shooting | 2.67 | <b>10.91</b> | 16.19 | 9.30  | <b>14.66</b> | 18.81 | 13.90  | <b>17.27</b> | 20.63 | 15.73 | <b>19.87</b> | 25.24 | 18.35 | <b>23.62</b> | 31.87 |
| Athletics            | 1.03 | <b>4.44</b>  | 6.95  | 4.89  | <b>7.16</b>  | 9.06  | 7.57   | <b>9.05</b>  | 10.53 | 9.04  | <b>10.94</b> | 13.21 | 11.15 | <b>13.67</b> | 17.07 |
| Basketball           | 3.36 | <b>6.86</b>  | 9.69  | 8.71  | <b>11.09</b> | 13.19 | 12.43  | <b>14.03</b> | 15.62 | 14.86 | <b>16.96</b> | 19.34 | 18.36 | <b>21.19</b> | 24.70 |
| Fencing              | 0.00 | <b>5.58</b>  | 10.40 | 4.83  | <b>9.55</b>  | 13.24 | 9.40   | <b>12.30</b> | 15.22 | 11.37 | <b>15.06</b> | 19.78 | 14.21 | <b>19.03</b> | 26.36 |
| Gymnastics           | 0.39 | <b>5.49</b>  | 9.18  | 5.87  | <b>9.25</b>  | 12.05 | 9.68   | <b>11.87</b> | 14.05 | 11.68 | <b>14.48</b> | 17.86 | 14.55 | <b>18.24</b> | 23.35 |
| Handball             | 0.00 | <b>6.25</b>  | 11.58 | 6.66  | <b>11.58</b> | 15.62 | 12.14  | <b>15.29</b> | 18.44 | 14.95 | <b>19.00</b> | 23.91 | 19.00 | <b>24.34</b> | 31.79 |
| Hockey Rink          | 1.74 | <b>5.92</b>  | 9.28  | 8.21  | <b>11.03</b> | 13.51 | 12.71  | <b>14.58</b> | 16.44 | 15.64 | <b>18.12</b> | 20.94 | 19.87 | <b>23.23</b> | 27.41 |
| Korfball             | 0.00 | <b>6.28</b>  | 10.79 | 5.37  | <b>9.84</b>  | 13.32 | 9.54   | <b>12.31</b> | 15.07 | 11.30 | <b>14.78</b> | 19.25 | 13.82 | <b>18.33</b> | 25.25 |
| Modern Pentathlon    | 0.00 | <b>3.62</b>  | 9.00  | 3.19  | <b>8.35</b>  | 12.46 | 8.43   | <b>11.65</b> | 14.86 | 10.83 | <b>14.94</b> | 20.10 | 14.29 | <b>19.67</b> | 27.63 |
| Motorsport           | NA   | NA           | NA    | NA    | NA           | NA    | NA     | NA           | NA    | NA    | NA           | NA    | NA    | NA           | NA    |
| Other combat sports  | 0.08 | <b>4.74</b>  | 8.28  | 5.92  | <b>9.02</b>  | 11.67 | 9.97   | <b>12.00</b> | 14.03 | 12.33 | <b>14.97</b> | 18.08 | 15.71 | <b>19.25</b> | 23.92 |
| Rowing               | 1.36 | <b>5.43</b>  | 8.50  | 6.29  | <b>9.00</b>  | 11.32 | 9.71   | <b>11.49</b> | 13.28 | 11.67 | <b>13.97</b> | 16.70 | 14.48 | <b>17.55</b> | 21.62 |
| Rugby                | 0.00 | <b>1.25</b>  | 7.23  | 6.74  | <b>11.62</b> | 15.94 | 15.66  | <b>18.83</b> | 21.99 | 21.71 | <b>26.03</b> | 30.91 | 30.42 | <b>36.40</b> | 43.75 |
| Sailing              | 0.67 | <b>6.24</b>  | 10.59 | 8.39  | <b>12.12</b> | 15.34 | 13.76  | <b>16.20</b> | 18.65 | 17.06 | <b>20.29</b> | 24.02 | 21.82 | <b>26.17</b> | 31.74 |
| Soccer               | 0.93 | <b>5.52</b>  | 8.78  | 5.54  | <b>8.59</b>  | 11.08 | 8.75   | <b>10.72</b> | 12.69 | 10.36 | <b>12.85</b> | 15.90 | 12.67 | <b>15.92</b> | 20.52 |
| Surf                 | NA   | NA           | NA    | NA    | NA           | NA    | NA     | NA           | NA    | NA    | NA           | NA    | NA    | NA           | NA    |
| Swimming             | 2.14 | <b>4.96</b>  | 7.20  | 6.24  | <b>8.14</b>  | 9.81  | 9.09   | <b>10.36</b> | 11.63 | 10.91 | <b>12.57</b> | 14.48 | 13.52 | <b>15.76</b> | 18.58 |
| Tennis               | 3.65 | <b>8.12</b>  | 11.38 | 8.30  | <b>11.31</b> | 13.81 | 11.54  | <b>13.52</b> | 15.50 | 13.23 | <b>15.73</b> | 18.73 | 15.66 | <b>18.92</b> | 23.39 |
| Triathlon            | 2.34 | <b>5.06</b>  | 7.18  | 5.91  | <b>7.74</b>  | 9.34  | 8.39   | <b>9.61</b>  | 10.83 | 9.89  | <b>11.47</b> | 13.31 | 12.04 | <b>14.15</b> | 16.88 |
| Volleyball           | 1.46 | <b>6.14</b>  | 9.48  | 6.16  | <b>9.28</b>  | 11.83 | 9.44   | <b>11.45</b> | 13.47 | 11.07 | <b>13.63</b> | 16.74 | 13.43 | <b>16.76</b> | 21.45 |
| Wrestling and Judo   | 2.10 | <b>4.61</b>  | 6.68  | 6.50  | <b>8.20</b>  | 9.72  | 9.55   | <b>10.69</b> | 11.84 | 11.66 | <b>13.19</b> | 14.89 | 14.70 | <b>16.78</b> | 19.29 |

NA: data not presented for n &lt; 8.

Table 7 – Sum of leg skinfolds [thigh + medial calf (mm)] percentiles by sport and sex

| Sport                | 0.05  |          |       | 0.25  |          |       | Median |          |       | 0.75  |          |       | 0.95  |          |       |
|----------------------|-------|----------|-------|-------|----------|-------|--------|----------|-------|-------|----------|-------|-------|----------|-------|
|                      | Low   | Estimate | High  | Low   | Estimate | High  | Low    | Estimate | High  | Low   | Estimate | High  | Low   | Estimate | High  |
| <b>Females</b>       |       |          |       |       |          |       |        |          |       |       |          |       |       |          |       |
| Archery and Shooting | NA    | NA       | NA    | NA    | NA       | NA    | NA     | NA       | NA    | NA    | NA       | NA    | NA    | NA       | NA    |
| Athletics            | 0.00  | 4.46     | 13.24 | 7.31  | 15.00    | 21.61 | 17.21  | 22.32    | 27.43 | 23.03 | 29.64    | 37.32 | 31.39 | 40.17    | 51.56 |
| Basketball           | 11.18 | 21.95    | 30.70 | 26.92 | 34.36    | 40.96 | 37.86  | 42.97    | 48.09 | 44.99 | 51.59    | 59.03 | 55.25 | 63.99    | 74.77 |
| Fencing              | NA    | NA       | NA    | NA    | NA       | NA    | NA     | NA       | NA    | NA    | NA       | NA    | NA    | NA       | NA    |
| Gymnastics           | 4.59  | 17.45    | 27.30 | 18.71 | 27.58    | 35.22 | 28.52  | 34.63    | 40.73 | 34.03 | 41.67    | 50.54 | 41.95 | 51.80    | 64.67 |
| Handball             | NA    | NA       | NA    | NA    | NA       | NA    | NA     | NA       | NA    | NA    | NA       | NA    | NA    | NA       | NA    |
| Hockey Rink          | NA    | NA       | NA    | NA    | NA       | NA    | NA     | NA       | NA    | NA    | NA       | NA    | NA    | NA       | NA    |
| Korfball             | 3.00  | 19.59    | 31.81 | 17.49 | 29.11    | 38.91 | 27.57  | 35.72    | 43.85 | 32.51 | 42.34    | 53.93 | 39.62 | 51.86    | 68.43 |
| Modern Pentathlon    | 0.00  | 13.06    | 25.40 | 10.55 | 22.33    | 32.24 | 20.58  | 28.78    | 36.99 | 25.33 | 35.22    | 47.02 | 32.17 | 44.49    | 61.44 |
| Motorsport           | NA    | NA       | NA    | NA    | NA       | NA    | NA     | NA       | NA    | NA    | NA       | NA    | NA    | NA       | NA    |
| Other combat sports  | 0.00  | 16.05    | 28.23 | 14.99 | 26.38    | 36.03 | 25.68  | 33.56    | 41.44 | 31.10 | 40.74    | 52.13 | 38.89 | 51.07    | 67.51 |
| Rowing               | 2.94  | 19.02    | 30.86 | 16.50 | 27.81    | 37.37 | 25.93  | 33.92    | 41.90 | 30.46 | 40.02    | 51.33 | 36.97 | 48.81    | 64.89 |
| Rugby                | NA    | NA       | NA    | NA    | NA       | NA    | NA     | NA       | NA    | NA    | NA       | NA    | NA    | NA       | NA    |
| Sailing              | NA    | NA       | NA    | NA    | NA       | NA    | NA     | NA       | NA    | NA    | NA       | NA    | NA    | NA       | NA    |
| Soccer               | 7.33  | 19.99    | 29.86 | 22.24 | 30.98    | 38.58 | 32.60  | 38.61    | 44.64 | 38.66 | 46.24    | 55.01 | 47.38 | 57.23    | 69.92 |
| Surf                 | NA    | NA       | NA    | NA    | NA       | NA    | NA     | NA       | NA    | NA    | NA       | NA    | NA    | NA       | NA    |
| Swimming             | 6.91  | 16.62    | 24.27 | 19.05 | 25.75    | 31.60 | 27.48  | 32.09    | 36.70 | 32.58 | 38.43    | 45.13 | 39.91 | 47.55    | 57.26 |
| Tennis               | 13.40 | 28.99    | 40.70 | 27.32 | 38.33    | 47.75 | 37.00  | 44.81    | 52.65 | 41.90 | 51.30    | 62.33 | 48.95 | 60.63    | 76.26 |
| Triathlon            | 0.00  | 10.73    | 23.98 | 7.46  | 20.25    | 30.93 | 17.98  | 26.87    | 35.76 | 22.81 | 33.49    | 46.28 | 29.76 | 43.02    | 61.41 |
| Volleyball           | 0.00  | 17.22    | 31.15 | 18.33 | 30.99    | 41.80 | 31.93  | 40.57    | 49.20 | 39.34 | 50.14    | 62.80 | 49.99 | 63.92    | 82.37 |
| Wrestling and Judo   | 1.20  | 18.48    | 31.78 | 21.33 | 33.16    | 43.36 | 35.32  | 43.36    | 51.41 | 43.36 | 53.56    | 65.40 | 54.94 | 68.24    | 85.52 |
| <b>Males</b>         |       |          |       |       |          |       |        |          |       |       |          |       |       |          |       |
| Archery and Shooting | 0.00  | 12.74    | 21.42 | 10.13 | 19.00    | 25.77 | 17.90  | 23.35    | 28.80 | 20.92 | 27.70    | 36.57 | 25.27 | 33.95    | 47.75 |
| Athletics            | 0.00  | 4.81     | 8.66  | 5.54  | 9.01     | 11.91 | 9.69   | 11.93    | 14.17 | 11.95 | 14.85    | 18.32 | 15.20 | 19.05    | 24.29 |
| Basketball           | 3.77  | 9.16     | 13.50 | 12.03 | 15.67    | 18.88 | 17.77  | 20.19    | 22.62 | 21.51 | 24.72    | 28.36 | 26.89 | 31.23    | 36.62 |
| Fencing              | 0.00  | 4.74     | 13.38 | 3.45  | 11.94    | 18.50 | 11.84  | 16.94    | 22.05 | 15.39 | 21.94    | 30.44 | 20.51 | 29.14    | 42.50 |
| Gymnastics           | 0.00  | 6.70     | 12.13 | 7.29  | 12.26    | 16.37 | 12.92  | 16.12    | 19.31 | 15.87 | 19.98    | 24.95 | 20.10 | 25.54    | 33.06 |
| Handball             | 1.77  | 11.00    | 17.64 | 11.47 | 17.59    | 22.65 | 18.20  | 22.17    | 26.13 | 21.68 | 26.75    | 32.87 | 26.70 | 33.33    | 42.56 |
| Hockey Rink          | 0.00  | 6.51     | 12.61 | 10.75 | 15.85    | 20.32 | 19.00  | 22.34    | 25.68 | 24.35 | 28.83    | 33.92 | 32.06 | 38.16    | 45.79 |
| Korfball             | 0.00  | 6.48     | 13.40 | 5.11  | 12.00    | 17.30 | 11.64  | 15.83    | 20.01 | 14.35 | 19.66    | 26.54 | 18.25 | 25.18    | 35.94 |
| Modern Pentathlon    | 0.00  | 5.07     | 11.79 | 4.53  | 10.97    | 16.10 | 11.06  | 15.08    | 19.11 | 14.06 | 19.19    | 25.63 | 18.38 | 25.10    | 35.02 |
| Motorsport           | NA    | NA       | NA    | NA    | NA       | NA    | NA     | NA       | NA    | NA    | NA       | NA    | NA    | NA       | NA    |
| Other combat sports  | 0.00  | 0.50     | 9.32  | 3.63  | 11.35    | 17.83 | 14.04  | 18.89    | 23.74 | 19.95 | 26.43    | 34.16 | 28.46 | 37.28    | 49.14 |
| Rowing               | 0.00  | 5.46     | 10.79 | 7.02  | 11.73    | 15.71 | 13.05  | 16.09    | 19.13 | 16.47 | 20.45    | 25.16 | 21.39 | 26.72    | 33.84 |
| Rugby                | 0.00  | 0.99     | 10.10 | 9.37  | 16.79    | 23.36 | 22.97  | 27.78    | 32.58 | 32.19 | 38.76    | 46.18 | 45.45 | 54.56    | 65.76 |
| Sailing              | 0.00  | 1.29     | 10.93 | 6.28  | 14.51    | 21.54 | 18.46  | 23.69    | 28.92 | 25.83 | 32.87    | 41.09 | 36.44 | 46.08    | 58.61 |
| Soccer               | 0.00  | 6.74     | 11.89 | 6.82  | 11.63    | 15.57 | 11.96  | 15.04    | 18.12 | 14.51 | 18.44    | 23.26 | 18.18 | 23.34    | 30.66 |
| Surf                 | NA    | NA       | NA    | NA    | NA       | NA    | NA     | NA       | NA    | NA    | NA       | NA    | NA    | NA       | NA    |
| Swimming             | 1.89  | 6.85     | 10.79 | 9.13  | 12.47    | 15.39 | 14.17  | 16.38    | 18.59 | 17.37 | 20.29    | 23.62 | 21.97 | 25.91    | 30.87 |
| Tennis               | 2.97  | 9.89     | 14.89 | 10.22 | 14.83    | 18.65 | 15.27  | 18.27    | 21.26 | 17.88 | 21.70    | 26.31 | 21.64 | 26.64    | 33.56 |
| Triathlon            | 2.33  | 6.69     | 10.06 | 8.06  | 10.99    | 13.51 | 12.04  | 13.98    | 15.91 | 14.44 | 16.96    | 19.89 | 17.89 | 21.26    | 25.62 |
| Volleyball           | 0.00  | 6.03     | 12.96 | 6.19  | 12.67    | 17.92 | 13.18  | 17.28    | 21.37 | 16.63 | 21.89    | 28.36 | 21.59 | 28.52    | 38.42 |
| Wrestling and Judo   | 0.95  | 5.40     | 9.07  | 8.79  | 11.80    | 14.48 | 14.25  | 16.24    | 18.24 | 18.01 | 20.69    | 23.69 | 23.42 | 27.09    | 31.54 |

NA: data not presented for n &lt; 8.



Table 8 – Sum of trunk skinfolds [subscapular + suprailiac + abdominal (mm)] percentiles by sport and sex

| Sport                |       | 0.05         |          |       | 0.25         |          |       | Median       |          |       | 0.75         |          |       | 0.95          |          |      |
|----------------------|-------|--------------|----------|-------|--------------|----------|-------|--------------|----------|-------|--------------|----------|-------|---------------|----------|------|
|                      |       | Low          | Estimate | High  | Low          | Estimate | High  | Low          | Estimate | High  | Low          | Estimate | High  | Low           | Estimate | High |
| <b>Females</b>       |       |              |          |       |              |          |       |              |          |       |              |          |       |               |          |      |
| Archery and Shooting | 0.00  | <b>17.37</b> | 42.54    | 11.08 | <b>36.32</b> | 55.81    | 33.96 | <b>49.49</b> | 65.03    | 43.18 | <b>62.67</b> | 87.91    | 56.44 | <b>81.62</b>  | 120.84   |      |
| Athletics            | 0.00  | <b>9.11</b>  | 18.57    | 11.13 | <b>19.59</b> | 26.71    | 21.39 | <b>26.88</b> | 32.36    | 27.04 | <b>34.16</b> | 42.62    | 35.18 | <b>44.64</b>  | 57.38    |      |
| Basketball           | 1.55  | <b>13.59</b> | 23.27    | 20.20 | <b>28.31</b> | 35.46    | 33.16 | <b>38.54</b> | 43.92    | 41.63 | <b>48.77</b> | 56.89    | 53.81 | <b>63.49</b>  | 75.54    |      |
| Fencing              | 0.00  | <b>14.70</b> | 29.43    | 12.80 | <b>27.00</b> | 38.40    | 26.46 | <b>35.54</b> | 44.63    | 32.69 | <b>44.09</b> | 58.29    | 41.65 | <b>56.38</b>  | 77.94    |      |
| Gymnastics           | 0.00  | <b>9.72</b>  | 21.95    | 11.39 | <b>22.51</b> | 31.74    | 24.25 | <b>31.40</b> | 38.54    | 31.06 | <b>40.29</b> | 51.40    | 40.85 | <b>53.07</b>  | 69.90    |      |
| Handball             | 0.00  | <b>16.77</b> | 36.37    | 18.86 | <b>36.78</b> | 51.62    | 39.16 | <b>50.69</b> | 62.22    | 49.76 | <b>64.60</b> | 82.53    | 65.01 | <b>84.61</b>  | 111.74   |      |
| Hockey Rink          | 4.93  | <b>17.46</b> | 27.58    | 24.49 | <b>32.96</b> | 40.43    | 38.09 | <b>43.73</b> | 49.37    | 47.02 | <b>54.50</b> | 62.96    | 59.88 | <b>70.00</b>  | 82.52    |      |
| Korfball             | 0.00  | <b>13.63</b> | 28.92    | 11.19 | <b>26.10</b> | 37.86    | 25.48 | <b>34.76</b> | 44.06    | 31.69 | <b>43.42</b> | 58.35    | 40.62 | <b>55.89</b>  | 78.91    |      |
| Modern Pentathlon    | 0.00  | <b>11.90</b> | 24.46    | 11.20 | <b>23.12</b> | 32.76    | 23.29 | <b>30.92</b> | 38.53    | 29.06 | <b>38.72</b> | 50.62    | 37.37 | <b>49.94</b>  | 68.00    |      |
| Motorsport           | NA    | <b>NA</b>    | NA       | NA    | <b>NA</b>    | NA       | NA    | <b>NA</b>    | NA       | NA    | <b>NA</b>    | NA       | NA    | <b>NA</b>     | NA       |      |
| Other combat sports  | 1.85  | <b>13.59</b> | 22.58    | 16.69 | <b>24.56</b> | 31.30    | 27.00 | <b>32.18</b> | 37.36    | 33.07 | <b>39.80</b> | 47.67    | 41.79 | <b>50.77</b>  | 62.51    |      |
| Rowing               | 0.73  | <b>13.72</b> | 23.57    | 16.70 | <b>25.39</b> | 32.79    | 27.80 | <b>33.50</b> | 39.20    | 34.21 | <b>41.61</b> | 50.30    | 43.42 | <b>53.28</b>  | 66.27    |      |
| Rugby                | 0.00  | <b>11.45</b> | 29.06    | 27.67 | <b>42.09</b> | 54.88    | 53.90 | <b>63.38</b> | 72.82    | 71.85 | <b>84.68</b> | 99.06    | 97.67 | <b>115.32</b> | 136.81   |      |
| Sailing              | 0.00  | <b>15.08</b> | 29.88    | 22.71 | <b>35.35</b> | 46.31    | 41.16 | <b>49.44</b> | 57.73    | 52.58 | <b>63.53</b> | 76.18    | 69.01 | <b>83.81</b>  | 102.72   |      |
| Soccer               | 6.18  | <b>18.71</b> | 27.78    | 18.94 | <b>27.35</b> | 34.34    | 27.81 | <b>33.36</b> | 38.90    | 32.38 | <b>39.37</b> | 47.78    | 38.94 | <b>48.01</b>  | 60.54    |      |
| Surf                 | NA    | <b>NA</b>    | NA       | NA    | <b>NA</b>    | NA       | NA    | <b>NA</b>    | NA       | NA    | <b>NA</b>    | NA       | NA    | <b>NA</b>     | NA       |      |
| Swimming             | 0.00  | <b>8.99</b>  | 17.67    | 14.25 | <b>21.58</b> | 27.98    | 25.51 | <b>30.33</b> | 35.15    | 32.67 | <b>39.08</b> | 46.41    | 42.98 | <b>51.66</b>  | 62.61    |      |
| Tennis               | 0.15  | <b>16.24</b> | 27.96    | 17.38 | <b>28.10</b> | 37.03    | 29.36 | <b>36.35</b> | 43.33    | 35.67 | <b>44.60</b> | 55.31    | 44.74 | <b>56.46</b>  | 72.54    |      |
| Triathlon            | 4.43  | <b>12.73</b> | 19.20    | 15.45 | <b>21.06</b> | 25.91    | 23.11 | <b>26.84</b> | 30.57    | 27.77 | <b>32.62</b> | 38.23    | 34.48 | <b>40.95</b>  | 49.25    |      |
| Volleyball           | 3.08  | <b>20.81</b> | 33.58    | 21.23 | <b>33.07</b> | 42.87    | 33.84 | <b>41.59</b> | 49.33    | 40.30 | <b>50.11</b> | 61.95    | 49.59 | <b>62.37</b>  | 80.10    |      |
| Wrestling and Judo   | 0.00  | <b>7.94</b>  | 16.25    | 15.78 | <b>22.56</b> | 28.62    | 28.25 | <b>32.73</b> | 37.21    | 36.84 | <b>42.90</b> | 49.68    | 49.21 | <b>57.52</b>  | 67.62    |      |
| <b>Males</b>         |       |              |          |       |              |          |       |              |          |       |              |          |       |               |          |      |
| Archery and Shooting | NA    | <b>NA</b>    | NA       | NA    | <b>NA</b>    | NA       | NA    | <b>NA</b>    | NA       | NA    | <b>NA</b>    | NA       | NA    | <b>NA</b>     | NA       |      |
| Athletics            | 0.00  | <b>12.55</b> | 23.74    | 17.03 | <b>26.68</b> | 35.31    | 29.65 | <b>36.50</b> | 43.34    | 37.69 | <b>46.32</b> | 55.97    | 49.26 | <b>60.45</b>  | 74.14    |      |
| Basketball           | 14.93 | <b>29.39</b> | 41.49    | 37.19 | <b>47.39</b> | 56.62    | 52.65 | <b>59.90</b> | 67.14    | 63.17 | <b>72.40</b> | 82.61    | 78.30 | <b>90.40</b>  | 104.86   |      |
| Fencing              | NA    | <b>NA</b>    | NA       | NA    | <b>NA</b>    | NA       | NA    | <b>NA</b>    | NA       | NA    | <b>NA</b>    | NA       | NA    | <b>NA</b>     | NA       |      |
| Gymnastics           | 0.00  | <b>13.98</b> | 26.89    | 16.98 | <b>28.35</b> | 38.48    | 30.16 | <b>38.34</b> | 46.53    | 38.21 | <b>48.33</b> | 59.71    | 49.79 | <b>62.70</b>  | 78.66    |      |
| Handball             | NA    | <b>NA</b>    | NA       | NA    | <b>NA</b>    | NA       | NA    | <b>NA</b>    | NA       | NA    | <b>NA</b>    | NA       | NA    | <b>NA</b>     | NA       |      |
| Hockey Rink          | NA    | <b>NA</b>    | NA       | NA    | <b>NA</b>    | NA       | NA    | <b>NA</b>    | NA       | NA    | <b>NA</b>    | NA       | NA    | <b>NA</b>     | NA       |      |
| Korfball             | 3.55  | <b>26.91</b> | 45.84    | 25.76 | <b>43.05</b> | 58.53    | 41.20 | <b>54.28</b> | 67.35    | 50.02 | <b>65.50</b> | 82.79    | 62.71 | <b>81.64</b>  | 105.00   |      |
| Modern Pentathlon    | 0.00  | <b>12.56</b> | 33.01    | 10.78 | <b>29.50</b> | 46.17    | 27.27 | <b>41.28</b> | 55.32    | 36.42 | <b>53.06</b> | 71.81    | 49.58 | <b>70.01</b>  | 95.54    |      |
| Motorsport           | NA    | <b>NA</b>    | NA       | NA    | <b>NA</b>    | NA       | NA    | <b>NA</b>    | NA       | NA    | <b>NA</b>    | NA       | NA    | <b>NA</b>     | NA       |      |
| Other combat sports  | 0.00  | <b>22.27</b> | 40.93    | 22.61 | <b>39.50</b> | 54.54    | 38.94 | <b>51.47</b> | 64.00    | 48.40 | <b>63.44</b> | 80.33    | 62.01 | <b>80.66</b>  | 103.81   |      |
| Rowing               | 1.09  | <b>23.73</b> | 42.10    | 21.91 | <b>38.74</b> | 53.84    | 36.38 | <b>49.18</b> | 62.00    | 44.54 | <b>59.61</b> | 76.47    | 56.28 | <b>74.62</b>  | 97.29    |      |
| Rugby                | NA    | <b>NA</b>    | NA       | NA    | <b>NA</b>    | NA       | NA    | <b>NA</b>    | NA       | NA    | <b>NA</b>    | NA       | NA    | <b>NA</b>     | NA       |      |
| Sailing              | NA    | <b>NA</b>    | NA       | NA    | <b>NA</b>    | NA       | NA    | <b>NA</b>    | NA       | NA    | <b>NA</b>    | NA       | NA    | <b>NA</b>     | NA       |      |
| Soccer               | 5.80  | <b>21.55</b> | 34.45    | 25.68 | <b>36.92</b> | 46.99    | 39.50 | <b>47.60</b> | 55.71    | 48.22 | <b>58.29</b> | 69.53    | 60.76 | <b>73.66</b>  | 89.41    |      |
| Surf                 | NA    | <b>NA</b>    | NA       | NA    | <b>NA</b>    | NA       | NA    | <b>NA</b>    | NA       | NA    | <b>NA</b>    | NA       | NA    | <b>NA</b>     | NA       |      |
| Swimming             | 3.68  | <b>17.99</b> | 29.73    | 22.85 | <b>32.98</b> | 42.05    | 36.18 | <b>43.39</b> | 50.61    | 44.74 | <b>53.81</b> | 63.93    | 57.05 | <b>68.79</b>  | 83.10    |      |
| Tennis               | 14.19 | <b>36.71</b> | 55.03    | 36.11 | <b>52.79</b> | 67.76    | 51.34 | <b>63.98</b> | 76.61    | 60.19 | <b>75.16</b> | 91.84    | 72.93 | <b>91.24</b>  | 113.76   |      |
| Triathlon            | 0.00  | <b>12.22</b> | 36.51    | 9.04  | <b>31.43</b> | 51.35    | 27.91 | <b>44.78</b> | 61.65    | 38.22 | <b>58.14</b> | 80.53    | 53.05 | <b>77.35</b>  | 107.68   |      |
| Volleyball           | 10.20 | <b>28.46</b> | 43.35    | 30.89 | <b>44.11</b> | 55.96    | 45.26 | <b>54.99</b> | 64.72    | 54.03 | <b>65.87</b> | 79.10    | 66.63 | <b>81.52</b>  | 99.78    |      |
| Wrestling and Judo   | 4.89  | <b>24.05</b> | 39.71    | 28.74 | <b>42.40</b> | 54.64    | 45.32 | <b>55.15</b> | 65.01    | 55.70 | <b>67.90</b> | 81.60    | 70.63 | <b>86.25</b>  | 105.45   |      |

NA: data not presented for n &lt; 8.

Table 9 – Arm circumference (cm) percentiles by sport and sex

| Sport                | 0.05  |              |       | 0.25  |              |       | Median |              |       | 0.75  |              |       | 0.95  |              |       |
|----------------------|-------|--------------|-------|-------|--------------|-------|--------|--------------|-------|-------|--------------|-------|-------|--------------|-------|
|                      | Low   | Estimate     | High  | Low   | Estimate     | High  | Low    | Estimate     | High  | Low   | Estimate     | High  | Low   | Estimate     | High  |
| <b>Females</b>       |       |              |       |       |              |       |        |              |       |       |              |       |       |              |       |
| Archery and Shooting | NA    | NA           | NA    | NA    | NA           | NA    | NA     | NA           | NA    | NA    | NA           | NA    | NA    | NA           | NA    |
| Athletics            | 20.69 | <b>22.24</b> | 23.71 | 23.07 | <b>24.38</b> | 25.64 | 24.73  | <b>25.86</b> | 26.99 | 26.08 | <b>27.34</b> | 28.65 | 28.01 | <b>29.48</b> | 31.03 |
| Basketball           | 22.11 | <b>23.47</b> | 24.75 | 24.52 | <b>25.64</b> | 26.73 | 26.20  | <b>27.15</b> | 28.10 | 27.57 | <b>28.66</b> | 29.78 | 29.55 | <b>30.83</b> | 32.19 |
| Fencing              | NA    | NA           | NA    | NA    | NA           | NA    | NA     | NA           | NA    | NA    | NA           | NA    | NA    | NA           | NA    |
| Gymnastics           | 19.91 | <b>21.69</b> | 23.37 | 22.36 | <b>23.87</b> | 25.34 | 24.06  | <b>25.38</b> | 26.71 | 25.43 | <b>26.90</b> | 28.41 | 27.40 | <b>29.08</b> | 30.86 |
| Handball             | NA    | NA           | NA    | NA    | NA           | NA    | NA     | NA           | NA    | NA    | NA           | NA    | NA    | NA           | NA    |
| Hockey Rink          | NA    | NA           | NA    | NA    | NA           | NA    | NA     | NA           | NA    | NA    | NA           | NA    | NA    | NA           | NA    |
| Korfball             | 20.79 | <b>23.06</b> | 25.23 | 23.22 | <b>25.21</b> | 27.17 | 24.90  | <b>26.71</b> | 28.52 | 26.25 | <b>28.21</b> | 30.20 | 28.19 | <b>30.36</b> | 32.63 |
| Modern Pentathlon    | 20.64 | <b>23.05</b> | 25.36 | 23.12 | <b>25.25</b> | 27.34 | 24.84  | <b>26.78</b> | 28.71 | 26.22 | <b>28.31</b> | 30.44 | 28.19 | <b>30.50</b> | 32.91 |
| Motorsport           | NA    | NA           | NA    | NA    | NA           | NA    | NA     | NA           | NA    | NA    | NA           | NA    | NA    | NA           | NA    |
| Other combat sports  | 21.81 | <b>23.97</b> | 26.02 | 24.29 | <b>26.17</b> | 28.01 | 26.02  | <b>27.71</b> | 29.40 | 27.40 | <b>29.24</b> | 31.12 | 29.39 | <b>31.45</b> | 33.61 |
| Rowing               | 21.36 | <b>23.73</b> | 25.98 | 23.78 | <b>25.87</b> | 27.91 | 25.46  | <b>27.37</b> | 29.25 | 26.80 | <b>28.86</b> | 30.94 | 28.74 | <b>31.01</b> | 33.35 |
| Rugby                | NA    | NA           | NA    | NA    | NA           | NA    | NA     | NA           | NA    | NA    | NA           | NA    | NA    | NA           | NA    |
| Sailing              | NA    | NA           | NA    | NA    | NA           | NA    | NA     | NA           | NA    | NA    | NA           | NA    | NA    | NA           | NA    |
| Soccer               | 20.86 | <b>22.53</b> | 24.09 | 23.29 | <b>24.71</b> | 26.06 | 24.99  | <b>26.22</b> | 27.44 | 26.36 | <b>27.74</b> | 29.13 | 28.34 | <b>29.92</b> | 31.57 |
| Surf                 | NA    | NA           | NA    | NA    | NA           | NA    | NA     | NA           | NA    | NA    | NA           | NA    | NA    | NA           | NA    |
| Swimming             | 22.75 | <b>24.29</b> | 25.76 | 25.14 | <b>26.44</b> | 27.70 | 26.80  | <b>27.93</b> | 29.05 | 28.15 | <b>29.42</b> | 30.71 | 30.09 | <b>31.56</b> | 33.11 |
| Tennis               | 22.67 | <b>24.90</b> | 27.03 | 25.14 | <b>27.09</b> | 29.01 | 26.85  | <b>28.62</b> | 30.38 | 28.23 | <b>30.14</b> | 32.10 | 30.21 | <b>32.34</b> | 34.57 |
| Triathlon            | 20.77 | <b>23.31</b> | 25.78 | 23.27 | <b>25.54</b> | 27.78 | 25.02  | <b>27.08</b> | 29.17 | 26.40 | <b>28.63</b> | 30.91 | 28.40 | <b>30.85</b> | 33.41 |
| Volleyball           | 22.42 | <b>24.33</b> | 26.14 | 24.92 | <b>26.56</b> | 28.17 | 26.67  | <b>28.12</b> | 29.57 | 28.07 | <b>29.67</b> | 31.31 | 30.09 | <b>31.91</b> | 33.82 |
| Wrestling and Judo   | 22.38 | <b>24.10</b> | 25.75 | 24.87 | <b>26.32</b> | 27.76 | 26.60  | <b>27.87</b> | 29.16 | 28.00 | <b>29.42</b> | 30.89 | 30.01 | <b>31.65</b> | 33.38 |
| <b>Males</b>         |       |              |       |       |              |       |        |              |       |       |              |       |       |              |       |
| Archery and Shooting | 18.49 | <b>23.96</b> | 28.12 | 23.01 | <b>26.97</b> | 30.39 | 26.15  | <b>29.06</b> | 31.97 | 27.73 | <b>31.15</b> | 35.11 | 30.00 | <b>34.16</b> | 39.63 |
| Athletics            | 22.28 | <b>24.89</b> | 26.98 | 25.18 | <b>27.06</b> | 28.73 | 27.19  | <b>28.57</b> | 29.95 | 28.40 | <b>30.08</b> | 31.96 | 30.15 | <b>32.25</b> | 34.86 |
| Basketball           | 23.28 | <b>25.43</b> | 27.25 | 26.49 | <b>28.03</b> | 29.44 | 28.72  | <b>29.84</b> | 30.97 | 30.24 | <b>31.65</b> | 33.20 | 32.44 | <b>34.25</b> | 36.41 |
| Fencing              | 19.84 | <b>23.47</b> | 26.28 | 23.09 | <b>25.72</b> | 28.01 | 25.34  | <b>27.28</b> | 29.21 | 26.54 | <b>28.84</b> | 31.47 | 28.27 | <b>31.08</b> | 34.71 |
| Gymnastics           | 20.86 | <b>24.33</b> | 27.09 | 24.59 | <b>27.08</b> | 29.27 | 27.18  | <b>28.99</b> | 30.79 | 28.70 | <b>30.90</b> | 33.38 | 30.89 | <b>33.64</b> | 37.11 |
| Handball             | 22.71 | <b>26.25</b> | 29.06 | 26.42 | <b>28.97</b> | 31.22 | 29.00  | <b>30.86</b> | 32.72 | 30.50 | <b>32.75</b> | 35.30 | 32.66 | <b>35.46</b> | 39.01 |
| Hockey Rink          | 23.49 | <b>25.41</b> | 27.04 | 26.37 | <b>27.75</b> | 29.01 | 28.37  | <b>29.38</b> | 30.39 | 29.75 | <b>31.01</b> | 32.39 | 31.72 | <b>33.34</b> | 35.27 |
| Korfball             | 18.41 | <b>22.85</b> | 26.27 | 22.30 | <b>25.51</b> | 28.30 | 25.00  | <b>27.36</b> | 29.72 | 26.41 | <b>29.21</b> | 32.42 | 28.45 | <b>31.87</b> | 36.31 |
| Modern Pentathlon    | 20.23 | <b>24.20</b> | 27.28 | 23.98 | <b>26.84</b> | 29.33 | 26.58  | <b>28.67</b> | 30.76 | 28.00 | <b>30.50</b> | 33.36 | 30.06 | <b>33.14</b> | 37.10 |
| Motorsport           | NA    | NA           | NA    | NA    | NA           | NA    | NA     | NA           | NA    | NA    | NA           | NA    | NA    | NA           | NA    |
| Other combat sports  | 22.69 | <b>25.20</b> | 27.25 | 25.76 | <b>27.56</b> | 29.18 | 27.89  | <b>29.21</b> | 30.52 | 29.24 | <b>30.85</b> | 32.65 | 31.17 | <b>33.21</b> | 35.72 |
| Rowing               | 23.58 | <b>26.06</b> | 28.06 | 26.51 | <b>28.29</b> | 29.88 | 28.54  | <b>29.85</b> | 31.15 | 29.81 | <b>31.40</b> | 33.18 | 31.63 | <b>33.64</b> | 36.11 |
| Rugby                | 25.15 | <b>28.02</b> | 30.48 | 30.03 | <b>32.08</b> | 33.96 | 33.43  | <b>34.90</b> | 36.38 | 35.85 | <b>37.72</b> | 39.78 | 39.33 | <b>41.78</b> | 44.66 |
| Sailing              | 21.65 | <b>24.62</b> | 27.07 | 25.69 | <b>27.81</b> | 29.72 | 28.50  | <b>30.03</b> | 31.56 | 30.34 | <b>32.25</b> | 34.37 | 33.00 | <b>35.44</b> | 38.41 |
| Soccer               | 21.14 | <b>24.86</b> | 27.79 | 24.90 | <b>27.57</b> | 29.93 | 27.51  | <b>29.46</b> | 31.41 | 28.99 | <b>31.34</b> | 34.02 | 31.13 | <b>34.06</b> | 37.77 |
| Surf                 | NA    | NA           | NA    | NA    | NA           | NA    | NA     | NA           | NA    | NA    | NA           | NA    | NA    | NA           | NA    |
| Swimming             | 23.51 | <b>25.70</b> | 27.52 | 26.61 | <b>28.18</b> | 29.60 | 28.76  | <b>29.90</b> | 31.05 | 30.21 | <b>31.63</b> | 33.20 | 32.29 | <b>34.11</b> | 36.30 |
| Tennis               | 20.14 | <b>23.60</b> | 26.34 | 23.78 | <b>26.26</b> | 28.45 | 26.31  | <b>28.12</b> | 29.92 | 27.78 | <b>29.97</b> | 32.46 | 29.90 | <b>32.64</b> | 36.10 |
| Triathlon            | 22.96 | <b>24.84</b> | 26.38 | 25.33 | <b>26.69</b> | 27.91 | 26.98  | <b>27.98</b> | 28.98 | 28.05 | <b>29.27</b> | 30.62 | 29.58 | <b>31.12</b> | 32.99 |
| Volleyball           | 23.15 | <b>27.48</b> | 30.88 | 27.53 | <b>30.64</b> | 33.36 | 30.57  | <b>32.83</b> | 35.09 | 32.30 | <b>35.02</b> | 38.13 | 34.78 | <b>38.18</b> | 42.51 |
| Wrestling and Judo   | 23.87 | <b>25.99</b> | 27.82 | 27.48 | <b>29.00</b> | 30.40 | 29.99  | <b>31.09</b> | 32.20 | 31.78 | <b>33.19</b> | 34.71 | 34.37 | <b>36.19</b> | 38.32 |

NA: data not presented for n &lt; 8.

Table 10 – Arm muscle circumference (cm) percentiles by sport and sex

| Sport                | 0.05  |          |       | 0.25  |          |       | Median |          |       | 0.75  |          |       | 0.95  |          |       |
|----------------------|-------|----------|-------|-------|----------|-------|--------|----------|-------|-------|----------|-------|-------|----------|-------|
|                      | Low   | Estimate | High  | Low   | Estimate | High  | Low    | Estimate | High  | Low   | Estimate | High  | Low   | Estimate | High  |
| <b>Females</b>       |       |          |       |       |          |       |        |          |       |       |          |       |       |          |       |
| Archery and Shooting | NA    | NA       | NA    | NA    | NA       | NA    | NA     | NA       | NA    | NA    | NA       | NA    | NA    | NA       | NA    |
| Athletics            | 17.93 | 19.80    | 21.32 | 20.09 | 21.45    | 22.66 | 21.59  | 22.59    | 23.59 | 22.52 | 23.74    | 25.09 | 23.87 | 25.39    | 27.25 |
| Basketball           | 17.42 | 18.94    | 20.21 | 19.52 | 20.62    | 21.61 | 20.97  | 21.78    | 22.58 | 21.95 | 22.94    | 24.04 | 23.35 | 24.62    | 26.13 |
| Fencing              | NA    | NA       | NA    | NA    | NA       | NA    | NA     | NA       | NA    | NA    | NA       | NA    | NA    | NA       | NA    |
| Gymnastics           | 15.73 | 18.09    | 19.98 | 18.18 | 19.90    | 21.41 | 19.89  | 21.15    | 22.41 | 20.89 | 22.41    | 24.12 | 22.33 | 24.21    | 26.57 |
| Handball             | NA    | NA       | NA    | NA    | NA       | NA    | NA     | NA       | NA    | NA    | NA       | NA    | NA    | NA       | NA    |
| Hockey Rink          | NA    | NA       | NA    | NA    | NA       | NA    | NA     | NA       | NA    | NA    | NA       | NA    | NA    | NA       | NA    |
| Korfball             | 15.82 | 18.53    | 20.66 | 18.03 | 20.04    | 21.81 | 19.57  | 21.09    | 22.62 | 20.37 | 22.14    | 24.15 | 21.53 | 23.65    | 26.36 |
| Modern Pentathlon    | 15.19 | 18.69    | 21.42 | 17.98 | 20.57    | 22.85 | 19.92  | 21.88    | 23.84 | 20.91 | 23.19    | 25.78 | 22.34 | 25.07    | 28.57 |
| Motorsport           | NA    | NA       | NA    | NA    | NA       | NA    | NA     | NA       | NA    | NA    | NA       | NA    | NA    | NA       | NA    |
| Other combat sports  | 16.75 | 19.60    | 21.84 | 19.25 | 21.34    | 23.19 | 20.99  | 22.56    | 24.13 | 21.92 | 23.77    | 25.86 | 23.27 | 25.51    | 28.36 |
| Rowing               | 16.29 | 19.35    | 21.75 | 18.71 | 20.98    | 22.99 | 20.39  | 22.12    | 23.85 | 21.25 | 23.25    | 25.53 | 22.49 | 24.88    | 27.95 |
| Rugby                | NA    | NA       | NA    | NA    | NA       | NA    | NA     | NA       | NA    | NA    | NA       | NA    | NA    | NA       | NA    |
| Sailing              | NA    | NA       | NA    | NA    | NA       | NA    | NA     | NA       | NA    | NA    | NA       | NA    | NA    | NA       | NA    |
| Soccer               | 16.29 | 18.50    | 20.28 | 18.75 | 20.35    | 21.77 | 20.46  | 21.63    | 22.81 | 21.50 | 22.92    | 24.52 | 22.99 | 24.77    | 26.98 |
| Surf                 | NA    | NA       | NA    | NA    | NA       | NA    | NA     | NA       | NA    | NA    | NA       | NA    | NA    | NA       | NA    |
| Swimming             | 18.68 | 20.72    | 22.38 | 21.08 | 22.56    | 23.88 | 22.75  | 23.84    | 24.92 | 23.79 | 25.11    | 26.59 | 25.29 | 26.96    | 29.00 |
| Tennis               | 13.36 | 17.61    | 20.91 | 17.07 | 20.16    | 22.86 | 19.64  | 21.93    | 24.21 | 21.00 | 23.70    | 26.79 | 22.95 | 26.24    | 30.49 |
| Triathlon            | 15.57 | 19.62    | 22.75 | 18.69 | 21.69    | 24.31 | 20.85  | 23.12    | 25.39 | 21.93 | 24.56    | 27.56 | 23.49 | 26.62    | 30.67 |
| Volleyball           | 16.60 | 19.47    | 21.75 | 19.47 | 21.55    | 23.40 | 21.46  | 23.00    | 24.54 | 22.61 | 24.45    | 26.54 | 24.25 | 26.53    | 29.41 |
| Wrestling and Judo   | 15.55 | 18.37    | 20.63 | 18.68 | 20.71    | 22.51 | 20.86  | 22.34    | 23.82 | 22.16 | 23.97    | 26.00 | 24.04 | 26.31    | 29.13 |
| <b>Males</b>         |       |          |       |       |          |       |        |          |       |       |          |       |       |          |       |
| Archery and Shooting | 15.04 | 21.64    | 26.00 | 20.18 | 24.61    | 28.11 | 23.76  | 26.68    | 29.58 | 25.22 | 28.75    | 33.15 | 27.33 | 31.72    | 38.29 |
| Athletics            | 20.82 | 23.65    | 25.83 | 23.83 | 25.81    | 27.53 | 25.93  | 27.32    | 28.71 | 27.11 | 28.83    | 30.81 | 28.81 | 30.99    | 33.82 |
| Basketball           | 21.33 | 23.31    | 24.95 | 24.18 | 25.58    | 26.85 | 26.16  | 27.16    | 28.16 | 27.47 | 28.74    | 30.14 | 29.37 | 31.01    | 32.99 |
| Fencing              | 16.83 | 21.48    | 24.76 | 20.74 | 23.93    | 26.56 | 23.46  | 25.63    | 27.81 | 24.71 | 27.34    | 30.53 | 26.51 | 29.79    | 34.44 |
| Gymnastics           | 19.94 | 23.20    | 25.66 | 23.24 | 25.51    | 27.46 | 25.54  | 27.12    | 28.70 | 26.78 | 28.73    | 31.00 | 28.58 | 31.04    | 34.30 |
| Handball             | 20.50 | 24.03    | 26.68 | 23.99 | 26.46    | 28.56 | 26.42  | 28.14    | 29.86 | 27.72 | 29.82    | 32.29 | 29.59 | 32.25    | 35.78 |
| Hockey Rink          | 20.58 | 22.59    | 24.25 | 23.50 | 24.93    | 26.21 | 25.53  | 26.55    | 27.57 | 26.89 | 28.17    | 29.60 | 28.85 | 30.51    | 32.52 |
| Korfball             | 14.75 | 20.77    | 24.93 | 19.72 | 23.81    | 27.14 | 23.17  | 25.93    | 28.68 | 24.71 | 28.04    | 32.13 | 26.92 | 31.08    | 37.10 |
| Modern Pentathlon    | 18.34 | 22.79    | 25.99 | 22.28 | 25.35    | 27.90 | 25.02  | 27.13    | 29.24 | 26.36 | 28.91    | 31.98 | 28.27 | 31.47    | 35.92 |
| Motorsport           | NA    | NA       | NA    | NA    | NA       | NA    | NA     | NA       | NA    | NA    | NA       | NA    | NA    | NA       | NA    |
| Other combat sports  | 21.20 | 23.58    | 25.46 | 23.99 | 25.66    | 27.13 | 25.92  | 27.10    | 28.29 | 27.08 | 28.55    | 30.22 | 28.75 | 30.63    | 33.01 |
| Rowing               | 22.79 | 24.96    | 26.66 | 25.22 | 26.75    | 28.09 | 26.91  | 28.00    | 29.09 | 27.90 | 29.24    | 30.78 | 29.33 | 31.04    | 33.20 |
| Rugby                | 23.17 | 25.58    | 27.62 | 27.14 | 28.85    | 30.39 | 29.90  | 31.11    | 32.32 | 31.83 | 33.38    | 35.08 | 34.61 | 36.64    | 39.05 |
| Sailing              | 18.17 | 21.36    | 23.92 | 22.40 | 24.63    | 26.59 | 25.35  | 26.90    | 28.45 | 27.21 | 29.17    | 31.39 | 29.88 | 32.44    | 35.63 |
| Soccer               | 19.97 | 23.79    | 26.62 | 23.61 | 26.26    | 28.50 | 26.13  | 27.97    | 29.80 | 27.44 | 29.68    | 32.33 | 29.32 | 32.14    | 35.97 |
| Surf                 | NA    | NA       | NA    | NA    | NA       | NA    | NA     | NA       | NA    | NA    | NA       | NA    | NA    | NA       | NA    |
| Swimming             | 0.00  | 9.46     | 18.25 | 14.67 | 22.11    | 28.59 | 26.04  | 30.91    | 35.78 | 33.23 | 39.71    | 47.15 | 43.57 | 52.36    | 63.50 |
| Tennis               | 17.65 | 21.46    | 24.31 | 21.46 | 24.10    | 26.34 | 24.11  | 25.93    | 27.75 | 25.52 | 27.76    | 30.40 | 27.55 | 30.39    | 34.20 |
| Triathlon            | 21.27 | 23.24    | 24.83 | 23.70 | 25.10    | 26.33 | 25.39  | 26.38    | 27.38 | 26.43 | 27.67    | 29.07 | 27.94 | 29.52    | 31.50 |
| Volleyball           | 22.27 | 26.53    | 29.68 | 26.32 | 29.28    | 31.77 | 29.13  | 31.18    | 33.23 | 30.59 | 33.09    | 36.04 | 32.68 | 35.83    | 40.09 |
| Wrestling and Judo   | 21.68 | 23.88    | 25.75 | 25.36 | 26.93    | 28.35 | 27.93  | 29.04    | 30.15 | 29.73 | 31.16    | 32.72 | 32.33 | 34.20    | 36.41 |

NA: data not presented for n &lt; 8.

Table 11 – Thigh circumference (cm) percentiles by sport and sex

| Sport                | 0.05  |              |       | 0.25  |              |       | Median |              |       | 0.75  |              |       | 0.95  |              |       |
|----------------------|-------|--------------|-------|-------|--------------|-------|--------|--------------|-------|-------|--------------|-------|-------|--------------|-------|
|                      | Low   | Estimate     | High  | Low   | Estimate     | High  | Low    | Estimate     | High  | Low   | Estimate     | High  | Low   | Estimate     | High  |
| <b>Females</b>       |       |              |       |       |              |       |        |              |       |       |              |       |       |              |       |
| Archery and Shooting | NA    | NA           | NA    | NA    | NA           | NA    | NA     | NA           | NA    | NA    | NA           | NA    | NA    | NA           | NA    |
| Athletics            | 44.00 | <b>45.32</b> | 46.63 | 47.12 | <b>48.42</b> | 49.73 | 49.29  | <b>50.59</b> | 51.88 | 51.44 | <b>52.75</b> | 54.05 | 54.54 | <b>55.85</b> | 57.17 |
| Basketball           | 46.50 | <b>47.56</b> | 48.61 | 49.62 | <b>50.67</b> | 51.71 | 51.79  | <b>52.83</b> | 53.86 | 53.94 | <b>54.99</b> | 56.03 | 57.04 | <b>58.10</b> | 59.15 |
| Fencing              | NA    | NA           | NA    | NA    | NA           | NA    | NA     | NA           | NA    | NA    | NA           | NA    | NA    | NA           | NA    |
| Gymnastics           | 41.97 | <b>43.50</b> | 45.03 | 45.09 | <b>46.61</b> | 48.13 | 47.26  | <b>48.77</b> | 50.28 | 49.41 | <b>50.93</b> | 52.45 | 52.51 | <b>54.04</b> | 55.56 |
| Handball             | NA    | NA           | NA    | NA    | NA           | NA    | NA     | NA           | NA    | NA    | NA           | NA    | NA    | NA           | NA    |
| Hockey Rink          | NA    | NA           | NA    | NA    | NA           | NA    | NA     | NA           | NA    | NA    | NA           | NA    | NA    | NA           | NA    |
| Korfball             | 39.40 | <b>41.55</b> | 43.64 | 42.52 | <b>44.66</b> | 46.74 | 44.68  | <b>46.82</b> | 48.90 | 46.84 | <b>48.98</b> | 51.06 | 49.94 | <b>52.09</b> | 54.18 |
| Modern Pentathlon    | 40.79 | <b>43.04</b> | 45.30 | 43.91 | <b>46.15</b> | 48.40 | 46.08  | <b>48.31</b> | 50.55 | 48.23 | <b>50.47</b> | 52.72 | 51.33 | <b>53.58</b> | 55.84 |
| Motorsport           | NA    | NA           | NA    | NA    | NA           | NA    | NA     | NA           | NA    | NA    | NA           | NA    | NA    | NA           | NA    |
| Other combat sports  | 43.08 | <b>45.06</b> | 47.11 | 46.20 | <b>48.17</b> | 50.20 | 48.37  | <b>50.33</b> | 52.36 | 50.52 | <b>52.49</b> | 54.53 | 53.62 | <b>55.60</b> | 57.64 |
| Rowing               | 44.25 | <b>46.49</b> | 48.73 | 47.37 | <b>49.60</b> | 51.83 | 49.54  | <b>51.76</b> | 53.99 | 51.69 | <b>53.92</b> | 56.15 | 54.79 | <b>57.03</b> | 59.27 |
| Rugby                | NA    | NA           | NA    | NA    | NA           | NA    | NA     | NA           | NA    | NA    | NA           | NA    | NA    | NA           | NA    |
| Sailing              | NA    | NA           | NA    | NA    | NA           | NA    | NA     | NA           | NA    | NA    | NA           | NA    | NA    | NA           | NA    |
| Soccer               | 43.31 | <b>44.71</b> | 46.10 | 46.43 | <b>47.82</b> | 49.20 | 48.59  | <b>49.98</b> | 51.36 | 50.75 | <b>52.14</b> | 53.53 | 53.85 | <b>55.25</b> | 56.64 |
| Surf                 | NA    | NA           | NA    | NA    | NA           | NA    | NA     | NA           | NA    | NA    | NA           | NA    | NA    | NA           | NA    |
| Swimming             | 42.33 | <b>43.63</b> | 44.90 | 45.44 | <b>46.74</b> | 48.00 | 47.61  | <b>48.90</b> | 50.15 | 49.76 | <b>51.06</b> | 52.32 | 52.86 | <b>54.17</b> | 55.43 |
| Tennis               | 42.16 | <b>44.17</b> | 46.18 | 45.28 | <b>47.28</b> | 49.28 | 47.45  | <b>49.44</b> | 51.43 | 49.60 | <b>51.60</b> | 53.60 | 52.70 | <b>54.71</b> | 56.72 |
| Triathlon            | 41.27 | <b>43.65</b> | 46.07 | 44.39 | <b>46.76</b> | 49.17 | 46.56  | <b>48.92</b> | 51.32 | 48.71 | <b>51.08</b> | 53.49 | 51.81 | <b>54.19</b> | 56.61 |
| Volleyball           | 45.32 | <b>46.92</b> | 48.55 | 48.44 | <b>50.03</b> | 51.65 | 50.61  | <b>52.19</b> | 53.81 | 52.76 | <b>54.35</b> | 55.97 | 55.86 | <b>57.46</b> | 59.09 |
| Wrestling and Judo   | 43.63 | <b>45.03</b> | 46.47 | 46.74 | <b>48.14</b> | 49.57 | 48.91  | <b>50.30</b> | 51.73 | 51.07 | <b>52.46</b> | 53.89 | 54.17 | <b>55.57</b> | 57.01 |
| <b>Males</b>         |       |              |       |       |              |       |        |              |       |       |              |       |       |              |       |
| Archery and Shooting | 37.75 | <b>43.89</b> | 48.48 | 42.54 | <b>46.96</b> | 50.76 | 45.87  | <b>49.09</b> | 52.35 | 47.46 | <b>51.23</b> | 55.68 | 49.74 | <b>54.29</b> | 60.47 |
| Athletics            | 43.47 | <b>47.84</b> | 51.31 | 48.20 | <b>51.33</b> | 54.09 | 51.48  | <b>53.75</b> | 56.03 | 53.41 | <b>56.17</b> | 59.31 | 56.20 | <b>59.66</b> | 64.03 |
| Basketball           | 45.14 | <b>48.37</b> | 51.08 | 49.80 | <b>52.13</b> | 54.24 | 53.04  | <b>54.73</b> | 56.43 | 55.23 | <b>57.34</b> | 59.67 | 58.39 | <b>61.10</b> | 64.33 |
| Fencing              | 41.62 | <b>48.71</b> | 54.04 | 47.75 | <b>52.81</b> | 57.15 | 52.01  | <b>55.66</b> | 59.31 | 54.17 | <b>58.51</b> | 63.57 | 57.28 | <b>62.61</b> | 69.70 |
| Gymnastics           | 37.11 | <b>42.12</b> | 46.04 | 42.32 | <b>45.90</b> | 49.02 | 45.95  | <b>48.52</b> | 51.09 | 48.01 | <b>51.14</b> | 54.71 | 50.99 | <b>54.91</b> | 59.92 |
| Handball             | 42.90 | <b>48.03</b> | 52.03 | 48.07 | <b>51.74</b> | 54.95 | 51.66  | <b>54.32</b> | 56.98 | 53.69 | <b>56.90</b> | 60.58 | 56.61 | <b>60.62</b> | 65.74 |
| Hockey Rink          | 45.23 | <b>48.30</b> | 50.88 | 49.71 | <b>51.92</b> | 53.93 | 52.81  | <b>54.43</b> | 56.04 | 54.93 | <b>56.94</b> | 59.15 | 57.97 | <b>60.55</b> | 63.62 |
| Korfball             | 37.53 | <b>43.57</b> | 48.09 | 42.58 | <b>46.91</b> | 50.61 | 46.09  | <b>49.22</b> | 52.36 | 47.84 | <b>51.54</b> | 55.87 | 50.35 | <b>54.88</b> | 60.92 |
| Modern Pentathlon    | 31.70 | <b>42.21</b> | 50.10 | 41.57 | <b>48.95</b> | 55.25 | 48.43  | <b>53.63</b> | 58.83 | 52.01 | <b>58.31</b> | 65.69 | 57.16 | <b>65.05</b> | 75.56 |
| Motorsport           | NA    | NA           | NA    | NA    | NA           | NA    | NA     | NA           | NA    | NA    | NA           | NA    | NA    | NA           | NA    |
| Other combat sports  | 43.70 | <b>47.49</b> | 50.54 | 48.19 | <b>50.90</b> | 53.32 | 51.31  | <b>53.28</b> | 55.25 | 53.24 | <b>55.66</b> | 58.37 | 56.02 | <b>59.07</b> | 62.86 |
| Rowing               | 43.71 | <b>47.80</b> | 51.09 | 48.42 | <b>51.36</b> | 53.96 | 51.69  | <b>53.82</b> | 55.96 | 53.69 | <b>56.29</b> | 59.23 | 56.56 | <b>59.84</b> | 63.94 |
| Rugby                | 44.54 | <b>49.02</b> | 52.85 | 52.03 | <b>55.21</b> | 58.16 | 57.24  | <b>59.52</b> | 61.84 | 60.93 | <b>63.83</b> | 67.05 | 66.23 | <b>70.03</b> | 74.55 |
| Sailing              | 37.05 | <b>43.09</b> | 48.01 | 45.19 | <b>49.45</b> | 53.26 | 50.85  | <b>53.88</b> | 56.91 | 54.50 | <b>58.31</b> | 62.57 | 59.76 | <b>64.68</b> | 70.71 |
| Soccer               | 42.47 | <b>47.85</b> | 51.98 | 47.67 | <b>51.53</b> | 54.84 | 51.29  | <b>54.08</b> | 56.84 | 53.28 | <b>56.63</b> | 60.45 | 56.14 | <b>60.31</b> | 65.65 |
| Surf                 | NA    | NA           | NA    | NA    | NA           | NA    | NA     | NA           | NA    | NA    | NA           | NA    | NA    | NA           | NA    |
| Swimming             | 42.95 | <b>45.92</b> | 48.40 | 47.04 | <b>49.18</b> | 51.12 | 49.89  | <b>51.45</b> | 53.01 | 51.78 | <b>53.72</b> | 55.86 | 54.50 | <b>56.97</b> | 59.95 |
| Tennis               | 39.63 | <b>44.69</b> | 48.62 | 44.77 | <b>48.37</b> | 51.52 | 48.34  | <b>50.93</b> | 53.53 | 50.35 | <b>53.50</b> | 57.10 | 53.25 | <b>57.18</b> | 62.24 |
| Triathlon            | 41.75 | <b>44.84</b> | 47.36 | 45.60 | <b>47.81</b> | 49.80 | 48.27  | <b>49.88</b> | 51.50 | 49.97 | <b>51.95</b> | 54.17 | 52.41 | <b>54.93</b> | 58.02 |
| Volleyball           | 44.57 | <b>50.06</b> | 54.30 | 49.90 | <b>53.82</b> | 57.23 | 53.60  | <b>56.44</b> | 59.27 | 55.64 | <b>59.05</b> | 62.98 | 58.57 | <b>62.81</b> | 68.30 |
| Wrestling and Judo   | 44.26 | <b>46.81</b> | 48.95 | 48.43 | <b>50.27</b> | 51.93 | 51.33  | <b>52.68</b> | 53.99 | 53.39 | <b>55.09</b> | 56.89 | 56.37 | <b>58.55</b> | 61.06 |

NA: data not presented for n &lt; 8.

Table 12 – Thigh muscle circumference (cm) percentiles by sport and sex

| Sport                | 0.05  |              |       | 0.25  |              |       | Median |              |       | 0.75  |              |       | 0.95  |              |       |
|----------------------|-------|--------------|-------|-------|--------------|-------|--------|--------------|-------|-------|--------------|-------|-------|--------------|-------|
|                      | Low   | Estimate     | High  | Low   | Estimate     | High  | Low    | Estimate     | High  | Low   | Estimate     | High  | Low   | Estimate     | High  |
| <b>Females</b>       |       |              |       |       |              |       |        |              |       |       |              |       |       |              |       |
| Archery and Shooting | NA    | NA           | NA    | NA    | NA           | NA    | NA     | NA           | NA    | NA    | NA           | NA    | NA    | NA           | NA    |
| Athletics            | 39.20 | <b>40.47</b> | 41.74 | 42.29 | <b>43.56</b> | 44.83 | 44.44  | <b>45.71</b> | 46.97 | 46.59 | <b>47.85</b> | 49.12 | 49.67 | <b>50.94</b> | 52.21 |
| Basketball           | 39.13 | <b>40.15</b> | 41.17 | 42.22 | <b>43.24</b> | 44.25 | 44.37  | <b>45.38</b> | 46.40 | 46.52 | <b>47.53</b> | 48.55 | 49.60 | <b>50.62</b> | 51.64 |
| Fencing              | NA    | NA           | NA    | NA    | NA           | NA    | NA     | NA           | NA    | NA    | NA           | NA    | NA    | NA           | NA    |
| Gymnastics           | 37.70 | <b>39.21</b> | 40.68 | 40.80 | <b>42.30</b> | 43.77 | 42.95  | <b>44.44</b> | 45.91 | 45.09 | <b>46.59</b> | 48.06 | 48.18 | <b>49.68</b> | 51.16 |
| Handball             | NA    | NA           | NA    | NA    | NA           | NA    | NA     | NA           | NA    | NA    | NA           | NA    | NA    | NA           | NA    |
| Hockey Rink          | NA    | NA           | NA    | NA    | NA           | NA    | NA     | NA           | NA    | NA    | NA           | NA    | NA    | NA           | NA    |
| Korfball             | 31.36 | <b>33.44</b> | 35.57 | 34.45 | <b>36.53</b> | 38.66 | 36.60  | <b>38.68</b> | 40.80 | 38.75 | <b>40.82</b> | 42.95 | 41.83 | <b>43.91</b> | 46.05 |
| Modern Pentathlon    | 35.29 | <b>37.60</b> | 39.76 | 38.38 | <b>40.69</b> | 42.84 | 40.54  | <b>42.83</b> | 44.99 | 42.68 | <b>44.98</b> | 47.14 | 45.76 | <b>48.07</b> | 50.23 |
| Motorsport           | NA    | NA           | NA    | NA    | NA           | NA    | NA     | NA           | NA    | NA    | NA           | NA    | NA    | NA           | NA    |
| Other combat sports  | 35.85 | <b>37.88</b> | 39.86 | 38.94 | <b>40.97</b> | 42.94 | 41.09  | <b>43.12</b> | 45.09 | 43.24 | <b>45.27</b> | 47.24 | 46.32 | <b>48.36</b> | 50.33 |
| Rowing               | 37.53 | <b>39.78</b> | 41.99 | 40.63 | <b>42.87</b> | 45.07 | 42.78  | <b>45.01</b> | 47.22 | 44.92 | <b>47.16</b> | 49.37 | 48.01 | <b>50.25</b> | 52.46 |
| Rugby                | NA    | NA           | NA    | NA    | NA           | NA    | NA     | NA           | NA    | NA    | NA           | NA    | NA    | NA           | NA    |
| Sailing              | NA    | NA           | NA    | NA    | NA           | NA    | NA     | NA           | NA    | NA    | NA           | NA    | NA    | NA           | NA    |
| Soccer               | 37.36 | <b>38.73</b> | 40.07 | 40.46 | <b>41.82</b> | 43.16 | 42.61  | <b>43.97</b> | 45.30 | 44.75 | <b>46.12</b> | 47.45 | 47.84 | <b>49.21</b> | 50.55 |
| Surf                 | NA    | NA           | NA    | NA    | NA           | NA    | NA     | NA           | NA    | NA    | NA           | NA    | NA    | NA           | NA    |
| Swimming             | 37.06 | <b>38.27</b> | 39.54 | 40.15 | <b>41.36</b> | 42.62 | 42.30  | <b>43.51</b> | 44.77 | 44.45 | <b>45.65</b> | 46.92 | 47.53 | <b>48.74</b> | 50.01 |
| Tennis               | 32.50 | <b>34.50</b> | 36.48 | 35.59 | <b>37.59</b> | 39.57 | 37.74  | <b>39.74</b> | 41.71 | 39.89 | <b>41.89</b> | 43.86 | 42.97 | <b>44.98</b> | 46.96 |
| Triathlon            | 35.45 | <b>37.83</b> | 40.23 | 38.55 | <b>40.92</b> | 43.32 | 40.70  | <b>43.07</b> | 45.46 | 42.84 | <b>45.21</b> | 47.61 | 45.93 | <b>48.30</b> | 50.71 |
| Volleyball           | 38.58 | <b>40.18</b> | 41.74 | 41.68 | <b>43.27</b> | 44.83 | 43.83  | <b>45.41</b> | 46.97 | 45.97 | <b>47.56</b> | 49.12 | 49.06 | <b>50.65</b> | 52.22 |
| Wrestling and Judo   | 36.93 | <b>38.32</b> | 39.70 | 40.03 | <b>41.41</b> | 42.79 | 42.18  | <b>43.55</b> | 44.93 | 44.32 | <b>45.70</b> | 47.08 | 47.41 | <b>48.79</b> | 50.18 |
| <b>Males</b>         |       |              |       |       |              |       |        |              |       |       |              |       |       |              |       |
| Archery and Shooting | 24.18 | <b>36.14</b> | 44.87 | 33.99 | <b>42.42</b> | 49.52 | 40.82  | <b>46.79</b> | 52.76 | 44.05 | <b>51.15</b> | 59.58 | 48.70 | <b>57.44</b> | 69.40 |
| Athletics            | 38.38 | <b>44.10</b> | 48.61 | 44.69 | <b>48.76</b> | 52.34 | 49.07  | <b>52.00</b> | 54.93 | 51.66 | <b>55.24</b> | 59.31 | 55.38 | <b>59.90</b> | 65.62 |
| Basketball           | 40.79 | <b>44.22</b> | 47.10 | 45.81 | <b>48.27</b> | 50.50 | 49.30  | <b>51.08</b> | 52.87 | 51.66 | <b>53.90</b> | 56.36 | 55.07 | <b>57.94</b> | 61.37 |
| Fencing              | 37.79 | <b>45.71</b> | 51.67 | 44.74 | <b>50.38</b> | 55.22 | 49.57  | <b>53.63</b> | 57.68 | 52.04 | <b>56.88</b> | 62.52 | 55.59 | <b>61.55</b> | 69.47 |
| Gymnastics           | 30.12 | <b>37.14</b> | 42.62 | 37.62 | <b>42.57</b> | 46.90 | 42.83  | <b>46.34</b> | 49.87 | 45.81 | <b>50.11</b> | 55.09 | 50.09 | <b>55.54</b> | 62.59 |
| Handball             | 34.76 | <b>41.52</b> | 46.77 | 41.77 | <b>46.56</b> | 50.73 | 46.65  | <b>50.06</b> | 53.48 | 49.40 | <b>53.57</b> | 58.36 | 53.36 | <b>58.61</b> | 65.36 |
| Hockey Rink          | 39.62 | <b>42.94</b> | 45.73 | 44.50 | <b>46.89</b> | 49.06 | 47.90  | <b>49.64</b> | 51.37 | 50.21 | <b>52.38</b> | 54.77 | 53.54 | <b>56.33</b> | 59.66 |
| Korfball             | 27.41 | <b>37.53</b> | 45.03 | 36.20 | <b>43.34</b> | 49.41 | 42.32  | <b>47.39</b> | 52.45 | 45.36 | <b>51.43</b> | 58.57 | 49.74 | <b>57.25</b> | 67.37 |
| Modern Pentathlon    | 28.57 | <b>39.58</b> | 47.89 | 39.03 | <b>46.75</b> | 53.38 | 46.30  | <b>51.73</b> | 57.19 | 50.12 | <b>56.71</b> | 64.46 | 55.60 | <b>63.88</b> | 74.92 |
| Motorsport           | NA    | NA           | NA    | NA    | NA           | NA    | NA     | NA           | NA    | NA    | NA           | NA    | NA    | NA           | NA    |
| Other combat sports  | 38.96 | <b>43.50</b> | 47.17 | 44.43 | <b>47.67</b> | 50.55 | 48.23  | <b>50.57</b> | 52.91 | 50.58 | <b>53.46</b> | 56.71 | 53.97 | <b>57.63</b> | 62.18 |
| Rowing               | 38.96 | <b>43.68</b> | 47.46 | 44.50 | <b>47.86</b> | 50.84 | 48.35  | <b>50.77</b> | 53.19 | 50.70 | <b>53.67</b> | 57.04 | 54.08 | <b>57.86</b> | 62.57 |
| Rugby                | 41.15 | <b>44.65</b> | 47.62 | 46.94 | <b>49.44</b> | 51.73 | 50.96  | <b>52.77</b> | 54.58 | 53.82 | <b>56.11</b> | 58.61 | 57.92 | <b>60.90</b> | 64.40 |
| Sailing              | 31.77 | <b>37.77</b> | 42.66 | 39.94 | <b>44.17</b> | 47.94 | 45.62  | <b>48.62</b> | 51.61 | 49.29 | <b>53.06</b> | 57.29 | 54.57 | <b>59.46</b> | 65.46 |
| Soccer               | 37.54 | <b>44.13</b> | 49.22 | 44.04 | <b>48.73</b> | 52.81 | 48.56  | <b>51.93</b> | 55.31 | 51.06 | <b>55.13</b> | 59.83 | 54.65 | <b>59.74</b> | 66.33 |
| Surf                 | NA    | NA           | NA    | NA    | NA           | NA    | NA     | NA           | NA    | NA    | NA           | NA    | NA    | NA           | NA    |
| Swimming             | 38.14 | <b>41.80</b> | 44.84 | 43.25 | <b>45.87</b> | 48.24 | 46.81  | <b>48.71</b> | 50.60 | 49.17 | <b>51.54</b> | 54.16 | 52.57 | <b>55.61</b> | 59.27 |
| Tennis               | 31.72 | <b>38.81</b> | 44.29 | 39.13 | <b>44.13</b> | 48.47 | 44.27  | <b>47.82</b> | 51.37 | 47.17 | <b>51.52</b> | 56.52 | 51.35 | <b>56.83</b> | 63.92 |
| Triathlon            | 36.24 | <b>40.56</b> | 44.06 | 41.73 | <b>44.80</b> | 47.54 | 45.54  | <b>47.75</b> | 49.96 | 47.96 | <b>50.70</b> | 53.78 | 51.44 | <b>54.95</b> | 59.26 |
| Volleyball           | 40.11 | <b>46.22</b> | 50.96 | 46.12 | <b>50.48</b> | 54.28 | 50.29  | <b>53.44</b> | 56.60 | 52.61 | <b>56.41</b> | 60.77 | 55.93 | <b>60.67</b> | 66.78 |
| Wrestling and Judo   | 41.19 | <b>43.74</b> | 45.93 | 45.42 | <b>47.26</b> | 48.95 | 48.36  | <b>49.71</b> | 51.05 | 50.47 | <b>52.15</b> | 53.99 | 53.49 | <b>55.67</b> | 58.22 |

NA: data not presented for n &lt; 8.

Table 13 – Calf circumference (cm) percentiles by sport and sex

| Sport                | 0.05  |              |       | 0.25  |              |       | Median |              |       | 0.75  |              |       | 0.95  |              |       |
|----------------------|-------|--------------|-------|-------|--------------|-------|--------|--------------|-------|-------|--------------|-------|-------|--------------|-------|
|                      | Low   | Estimate     | High  | Low   | Estimate     | High  | Low    | Estimate     | High  | Low   | Estimate     | High  | Low   | Estimate     | High  |
| <b>Females</b>       |       |              |       |       |              |       |        |              |       |       |              |       |       |              |       |
| Archery and Shooting | NA    | NA           | NA    | NA    | NA           | NA    | NA     | NA           | NA    | NA    | NA           | NA    | NA    | NA           | NA    |
| Athletics            | 30.07 | <b>32.27</b> | 34.02 | 32.48 | <b>34.06</b> | 35.45 | 34.16  | <b>35.30</b> | 36.44 | 35.15 | <b>36.54</b> | 38.12 | 36.58 | <b>38.33</b> | 40.54 |
| Basketball           | 31.02 | <b>33.30</b> | 35.17 | 34.03 | <b>35.65</b> | 37.12 | 36.11  | <b>37.29</b> | 38.47 | 37.47 | <b>38.93</b> | 40.56 | 39.42 | <b>41.29</b> | 43.56 |
| Fencing              | NA    | NA           | NA    | NA    | NA           | NA    | NA     | NA           | NA    | NA    | NA           | NA    | NA    | NA           | NA    |
| Gymnastics           | 28.20 | <b>30.80</b> | 32.80 | 30.70 | <b>32.55</b> | 34.16 | 32.43  | <b>33.77</b> | 35.10 | 33.37 | <b>34.98</b> | 36.84 | 34.74 | <b>36.73</b> | 39.33 |
| Handball             | NA    | NA           | NA    | NA    | NA           | NA    | NA     | NA           | NA    | NA    | NA           | NA    | NA    | NA           | NA    |
| Hockey Rink          | NA    | NA           | NA    | NA    | NA           | NA    | NA     | NA           | NA    | NA    | NA           | NA    | NA    | NA           | NA    |
| Korfball             | 28.96 | <b>32.52</b> | 35.09 | 31.63 | <b>34.17</b> | 36.30 | 33.49  | <b>35.32</b> | 37.14 | 34.33 | <b>36.46</b> | 39.00 | 35.54 | <b>38.11</b> | 41.67 |
| Modern Pentathlon    | 19.21 | <b>27.41</b> | 33.07 | 25.57 | <b>31.20</b> | 35.79 | 29.99  | <b>33.84</b> | 37.69 | 31.88 | <b>36.48</b> | 42.11 | 34.61 | <b>40.27</b> | 48.47 |
| Motorsport           | NA    | NA           | NA    | NA    | NA           | NA    | NA     | NA           | NA    | NA    | NA           | NA    | NA    | NA           | NA    |
| Other combat sports  | 28.71 | <b>32.63</b> | 35.49 | 31.79 | <b>34.57</b> | 36.92 | 33.92  | <b>35.92</b> | 37.92 | 34.92 | <b>37.27</b> | 40.06 | 36.36 | <b>39.21</b> | 43.14 |
| Rowing               | 27.59 | <b>32.25</b> | 35.55 | 31.06 | <b>34.34</b> | 37.06 | 33.48  | <b>35.79</b> | 38.11 | 34.53 | <b>37.25</b> | 40.53 | 36.04 | <b>39.34</b> | 44.00 |
| Rugby                | NA    | NA           | NA    | NA    | NA           | NA    | NA     | NA           | NA    | NA    | NA           | NA    | NA    | NA           | NA    |
| Sailing              | NA    | NA           | NA    | NA    | NA           | NA    | NA     | NA           | NA    | NA    | NA           | NA    | NA    | NA           | NA    |
| Soccer               | 27.43 | <b>30.85</b> | 33.52 | 31.06 | <b>33.48</b> | 35.59 | 33.58  | <b>35.31</b> | 37.04 | 35.02 | <b>37.13</b> | 39.56 | 37.10 | <b>39.76</b> | 43.19 |
| Surf                 | NA    | NA           | NA    | NA    | NA           | NA    | NA     | NA           | NA    | NA    | NA           | NA    | NA    | NA           | NA    |
| Swimming             | 29.85 | <b>32.02</b> | 33.75 | 32.24 | <b>33.80</b> | 35.18 | 33.91  | <b>35.04</b> | 36.17 | 34.90 | <b>36.28</b> | 37.84 | 36.33 | <b>38.06</b> | 40.23 |
| Tennis               | 29.06 | <b>32.83</b> | 35.58 | 32.01 | <b>34.69</b> | 36.96 | 34.05  | <b>35.98</b> | 37.91 | 35.01 | <b>37.27</b> | 39.96 | 36.38 | <b>39.13</b> | 42.90 |
| Triathlon            | 28.02 | <b>32.38</b> | 35.44 | 31.11 | <b>34.19</b> | 36.74 | 33.25  | <b>35.44</b> | 37.64 | 34.15 | <b>36.70</b> | 39.78 | 35.45 | <b>38.51</b> | 42.87 |
| Volleyball           | 28.86 | <b>32.92</b> | 36.00 | 32.66 | <b>35.53</b> | 38.00 | 35.29  | <b>37.34</b> | 39.40 | 36.69 | <b>39.16</b> | 42.03 | 38.69 | <b>41.77</b> | 45.83 |
| Wrestling and Judo   | 28.12 | <b>31.10</b> | 33.43 | 31.20 | <b>33.33</b> | 35.18 | 33.35  | <b>34.87</b> | 36.39 | 34.56 | <b>36.42</b> | 38.54 | 36.31 | <b>38.64</b> | 41.62 |
| <b>Males</b>         |       |              |       |       |              |       |        |              |       |       |              |       |       |              |       |
| Archery and Shooting | 28.56 | <b>32.25</b> | 35.27 | 31.64 | <b>34.46</b> | 37.01 | 33.78  | <b>36.00</b> | 38.22 | 35.00 | <b>37.54</b> | 40.37 | 36.74 | <b>39.76</b> | 43.45 |
| Athletics            | 31.04 | <b>33.50</b> | 35.56 | 33.83 | <b>35.67</b> | 37.34 | 35.78  | <b>37.18</b> | 38.58 | 37.01 | <b>38.68</b> | 40.52 | 38.79 | <b>40.85</b> | 43.32 |
| Basketball           | 32.20 | <b>34.34</b> | 36.18 | 35.40 | <b>36.97</b> | 38.42 | 37.62  | <b>38.80</b> | 39.97 | 39.18 | <b>40.62</b> | 42.20 | 41.42 | <b>43.25</b> | 45.39 |
| Fencing              | 29.94 | <b>33.17</b> | 35.83 | 32.89 | <b>35.34</b> | 37.55 | 34.95  | <b>36.85</b> | 38.75 | 36.15 | <b>38.36</b> | 40.81 | 37.87 | <b>40.53</b> | 43.76 |
| Gymnastics           | 28.46 | <b>31.32</b> | 33.68 | 31.58 | <b>33.70</b> | 35.62 | 33.75  | <b>35.36</b> | 36.97 | 35.09 | <b>37.02</b> | 39.14 | 37.04 | <b>39.40</b> | 42.26 |
| Handball             | 31.11 | <b>33.93</b> | 36.26 | 34.12 | <b>36.22</b> | 38.11 | 36.21  | <b>37.81</b> | 39.41 | 37.50 | <b>39.40</b> | 41.49 | 39.36 | <b>41.68</b> | 44.50 |
| Hockey Rink          | 31.44 | <b>33.43</b> | 35.13 | 34.44 | <b>35.90</b> | 37.24 | 36.52  | <b>37.61</b> | 38.70 | 37.98 | <b>39.33</b> | 40.78 | 40.09 | <b>41.79</b> | 43.78 |
| Korfball             | 29.97 | <b>33.37</b> | 36.17 | 32.90 | <b>35.50</b> | 37.84 | 34.94  | <b>36.98</b> | 39.01 | 36.11 | <b>38.45</b> | 41.05 | 37.79 | <b>40.58</b> | 43.99 |
| Modern Pentathlon    | 29.32 | <b>32.41</b> | 34.94 | 32.28 | <b>34.60</b> | 36.70 | 34.34  | <b>36.13</b> | 37.93 | 35.56 | <b>37.66</b> | 39.98 | 37.32 | <b>39.86</b> | 42.94 |
| Motorsport           | NA    | NA           | NA    | NA    | NA           | NA    | NA     | NA           | NA    | NA    | NA           | NA    | NA    | NA           | NA    |
| Other combat sports  | 30.96 | <b>33.28</b> | 35.23 | 33.83 | <b>35.55</b> | 37.11 | 35.83  | <b>37.12</b> | 38.42 | 37.13 | <b>38.70</b> | 40.42 | 39.02 | <b>40.97</b> | 43.29 |
| Rowing               | 29.20 | <b>32.04</b> | 34.41 | 32.66 | <b>34.75</b> | 36.65 | 35.06  | <b>36.64</b> | 38.21 | 36.62 | <b>38.52</b> | 40.61 | 38.86 | <b>41.24</b> | 44.07 |
| Rugby                | 32.87 | <b>35.03</b> | 36.91 | 36.53 | <b>38.11</b> | 39.56 | 39.07  | <b>40.24</b> | 41.41 | 40.92 | <b>42.38</b> | 43.95 | 43.57 | <b>45.45</b> | 47.61 |
| Sailing              | 30.68 | <b>32.82</b> | 34.64 | 33.56 | <b>35.13</b> | 36.58 | 35.55  | <b>36.74</b> | 37.93 | 36.90 | <b>38.35</b> | 39.92 | 38.84 | <b>40.66</b> | 42.80 |
| Soccer               | 29.40 | <b>32.55</b> | 35.14 | 32.64 | <b>34.99</b> | 37.11 | 34.89  | <b>36.69</b> | 38.49 | 36.27 | <b>38.39</b> | 40.74 | 38.24 | <b>40.84</b> | 43.98 |
| Surf                 | NA    | NA           | NA    | NA    | NA           | NA    | NA     | NA           | NA    | NA    | NA           | NA    | NA    | NA           | NA    |
| Swimming             | 31.42 | <b>33.06</b> | 34.46 | 33.75 | <b>34.95</b> | 36.06 | 35.36  | <b>36.27</b> | 37.17 | 36.48 | <b>37.58</b> | 38.79 | 38.08 | <b>39.47</b> | 41.11 |
| Tennis               | 30.22 | <b>32.74</b> | 34.82 | 32.90 | <b>34.78</b> | 36.48 | 34.76  | <b>36.19</b> | 37.63 | 35.91 | <b>37.61</b> | 39.49 | 37.56 | <b>39.64</b> | 42.16 |
| Triathlon            | 31.00 | <b>32.72</b> | 34.17 | 33.20 | <b>34.48</b> | 35.64 | 34.73  | <b>35.70</b> | 36.66 | 35.76 | <b>36.92</b> | 38.19 | 37.23 | <b>38.68</b> | 40.39 |
| Volleyball           | 31.95 | <b>34.83</b> | 37.21 | 34.90 | <b>37.06</b> | 39.01 | 36.94  | <b>38.60</b> | 40.26 | 38.19 | <b>40.15</b> | 42.31 | 39.99 | <b>42.37</b> | 45.25 |
| Wrestling and Judo   | 30.21 | <b>32.01</b> | 33.56 | 33.23 | <b>34.55</b> | 35.77 | 35.34  | <b>36.32</b> | 37.30 | 36.87 | <b>38.08</b> | 39.40 | 39.07 | <b>40.63</b> | 42.43 |

NA: data not presented for n &lt; 8.

Table 14 – Calf muscle circumference (cm) percentiles by sport and sex

| Sport                | 0.05  |              |       | 0.25  |              |       | Median |              |       | 0.75  |              |       | 0.95  |              |       |
|----------------------|-------|--------------|-------|-------|--------------|-------|--------|--------------|-------|-------|--------------|-------|-------|--------------|-------|
|                      | Low   | Estimate     | High  | Low   | Estimate     | High  | Low    | Estimate     | High  | Low   | Estimate     | High  | Low   | Estimate     | High  |
| <b>Females</b>       |       |              |       |       |              |       |        |              |       |       |              |       |       |              |       |
| Archery and Shooting | NA    | NA           | NA    | NA    | NA           | NA    | NA     | NA           | NA    | NA    | NA           | NA    | NA    | NA           | NA    |
| Athletics            | 27.26 | <b>29.66</b> | 31.54 | 29.87 | <b>31.57</b> | 33.06 | 31.68  | <b>32.90</b> | 34.11 | 32.74 | <b>34.23</b> | 35.93 | 34.26 | <b>36.14</b> | 38.54 |
| Basketball           | 24.98 | <b>27.44</b> | 29.44 | 28.26 | <b>30.00</b> | 31.55 | 30.54  | <b>31.78</b> | 33.01 | 32.00 | <b>33.55</b> | 35.29 | 34.11 | <b>36.11</b> | 38.57 |
| Fencing              | NA    | NA           | NA    | NA    | NA           | NA    | NA     | NA           | NA    | NA    | NA           | NA    | NA    | NA           | NA    |
| Gymnastics           | 23.48 | <b>26.43</b> | 28.65 | 26.32 | <b>28.39</b> | 30.16 | 28.29  | <b>29.75</b> | 31.21 | 29.35 | <b>31.11</b> | 33.18 | 30.86 | <b>33.08</b> | 36.02 |
| Handball             | NA    | NA           | NA    | NA    | NA           | NA    | NA     | NA           | NA    | NA    | NA           | NA    | NA    | NA           | NA    |
| Hockey Rink          | NA    | NA           | NA    | NA    | NA           | NA    | NA     | NA           | NA    | NA    | NA           | NA    | NA    | NA           | NA    |
| Korfball             | 23.61 | <b>27.64</b> | 30.43 | 26.67 | <b>29.46</b> | 31.73 | 28.79  | <b>30.72</b> | 32.64 | 29.70 | <b>31.98</b> | 34.77 | 31.00 | <b>33.79</b> | 37.82 |
| Modern Pentathlon    | 14.80 | <b>23.92</b> | 29.91 | 21.77 | <b>27.89</b> | 32.70 | 26.62  | <b>30.64</b> | 34.64 | 28.56 | <b>33.40</b> | 39.49 | 31.35 | <b>37.36</b> | 46.46 |
| Motorsport           | NA    | NA           | NA    | NA    | NA           | NA    | NA     | NA           | NA    | NA    | NA           | NA    | NA    | NA           | NA    |
| Other combat sports  | 25.37 | <b>28.81</b> | 31.24 | 28.01 | <b>30.42</b> | 32.42 | 29.85  | <b>31.54</b> | 33.23 | 30.67 | <b>32.66</b> | 35.07 | 31.84 | <b>34.27</b> | 37.71 |
| Rowing               | 24.98 | <b>28.67</b> | 31.21 | 27.64 | <b>30.21</b> | 32.30 | 29.49  | <b>31.28</b> | 33.06 | 30.25 | <b>32.34</b> | 34.91 | 31.35 | <b>33.88</b> | 37.57 |
| Rugby                | NA    | NA           | NA    | NA    | NA           | NA    | NA     | NA           | NA    | NA    | NA           | NA    | NA    | NA           | NA    |
| Sailing              | NA    | NA           | NA    | NA    | NA           | NA    | NA     | NA           | NA    | NA    | NA           | NA    | NA    | NA           | NA    |
| Soccer               | 23.14 | <b>26.48</b> | 29.05 | 26.66 | <b>29.00</b> | 31.02 | 29.10  | <b>30.75</b> | 32.39 | 30.47 | <b>32.49</b> | 34.84 | 32.44 | <b>35.01</b> | 38.35 |
| Surf                 | NA    | NA           | NA    | NA    | NA           | NA    | NA     | NA           | NA    | NA    | NA           | NA    | NA    | NA           | NA    |
| Swimming             | 25.77 | <b>28.03</b> | 29.81 | 28.26 | <b>29.86</b> | 31.27 | 29.99  | <b>31.14</b> | 32.29 | 31.01 | <b>32.42</b> | 34.02 | 32.47 | <b>34.26</b> | 36.52 |
| Tennis               | 22.65 | <b>26.70</b> | 29.55 | 25.79 | <b>28.61</b> | 30.94 | 27.98  | <b>29.94</b> | 31.91 | 28.95 | <b>31.27</b> | 34.09 | 30.34 | <b>33.19</b> | 37.23 |
| Triathlon            | 23.41 | <b>28.74</b> | 32.29 | 27.17 | <b>30.82</b> | 33.75 | 29.78  | <b>32.27</b> | 34.77 | 30.79 | <b>33.72</b> | 37.38 | 32.25 | <b>35.81</b> | 41.13 |
| Volleyball           | 24.68 | <b>28.45</b> | 31.25 | 28.17 | <b>30.81</b> | 33.05 | 30.60  | <b>32.44</b> | 34.29 | 31.84 | <b>34.08</b> | 36.72 | 33.64 | <b>36.44</b> | 40.21 |
| Wrestling and Judo   | 20.14 | <b>24.14</b> | 27.18 | 24.33 | <b>27.11</b> | 29.50 | 27.24  | <b>29.17</b> | 31.10 | 28.85 | <b>31.23</b> | 34.02 | 31.16 | <b>34.20</b> | 38.20 |
| <b>Males</b>         |       |              |       |       |              |       |        |              |       |       |              |       |       |              |       |
| Archery and Shooting | 25.99 | <b>29.78</b> | 32.70 | 29.01 | <b>31.80</b> | 34.22 | 31.11  | <b>33.20</b> | 35.29 | 32.17 | <b>34.60</b> | 37.39 | 33.70 | <b>36.61</b> | 40.40 |
| Athletics            | 29.73 | <b>32.30</b> | 34.38 | 32.55 | <b>34.42</b> | 36.08 | 34.52  | <b>35.90</b> | 37.27 | 35.71 | <b>37.37</b> | 39.24 | 37.42 | <b>39.49</b> | 42.07 |
| Basketball           | 29.94 | <b>32.05</b> | 33.83 | 33.01 | <b>34.54</b> | 35.94 | 35.15  | <b>36.28</b> | 37.40 | 36.61 | <b>38.01</b> | 39.54 | 38.72 | <b>40.50</b> | 42.61 |
| Fencing              | 27.73 | <b>31.27</b> | 34.02 | 30.83 | <b>33.41</b> | 35.67 | 32.98  | <b>34.90</b> | 36.82 | 34.13 | <b>36.39</b> | 38.97 | 35.78 | <b>38.53</b> | 42.06 |
| Gymnastics           | 26.52 | <b>29.53</b> | 31.93 | 29.69 | <b>31.86</b> | 33.79 | 31.89  | <b>33.49</b> | 35.08 | 33.18 | <b>35.11</b> | 37.28 | 35.04 | <b>37.44</b> | 40.45 |
| Handball             | 29.07 | <b>31.87</b> | 34.10 | 31.94 | <b>33.97</b> | 35.77 | 33.93  | <b>35.43</b> | 36.93 | 35.09 | <b>36.89</b> | 38.92 | 36.76 | <b>38.98</b> | 41.78 |
| Hockey Rink          | 28.09 | <b>30.33</b> | 32.22 | 31.43 | <b>33.04</b> | 34.51 | 33.75  | <b>34.93</b> | 36.10 | 35.34 | <b>36.81</b> | 38.42 | 37.64 | <b>39.52</b> | 41.76 |
| Korfball             | 28.83 | <b>32.33</b> | 35.05 | 31.69 | <b>34.27</b> | 36.52 | 33.68  | <b>35.62</b> | 37.55 | 34.71 | <b>36.97</b> | 39.54 | 36.19 | <b>38.90</b> | 42.40 |
| Modern Pentathlon    | 27.83 | <b>31.03</b> | 33.55 | 30.77 | <b>33.11</b> | 35.17 | 32.82  | <b>34.56</b> | 36.30 | 33.94 | <b>36.00</b> | 38.34 | 35.56 | <b>38.08</b> | 41.29 |
| Motorsport           | NA    | NA           | NA    | NA    | NA           | NA    | NA     | NA           | NA    | NA    | NA           | NA    | NA    | NA           | NA    |
| Other combat sports  | 24.31 | <b>28.19</b> | 31.32 | 29.12 | <b>31.88</b> | 34.34 | 32.46  | <b>34.45</b> | 36.43 | 34.56 | <b>37.02</b> | 39.78 | 37.57 | <b>40.71</b> | 44.59 |
| Rowing               | 27.43 | <b>30.29</b> | 32.62 | 30.80 | <b>32.87</b> | 34.72 | 33.15  | <b>34.66</b> | 36.17 | 34.61 | <b>36.45</b> | 38.52 | 36.70 | <b>39.03</b> | 41.90 |
| Rugby                | 30.03 | <b>32.05</b> | 33.77 | 33.36 | <b>34.81</b> | 36.15 | 35.67  | <b>36.74</b> | 37.80 | 37.32 | <b>38.66</b> | 40.11 | 39.70 | <b>41.42</b> | 43.44 |
| Sailing              | 26.52 | <b>29.18</b> | 31.38 | 30.06 | <b>31.97</b> | 33.69 | 32.52  | <b>33.91</b> | 35.29 | 34.12 | <b>35.84</b> | 37.75 | 36.43 | <b>38.63</b> | 41.29 |
| Soccer               | 27.31 | <b>30.86</b> | 33.66 | 30.84 | <b>33.41</b> | 35.67 | 33.29  | <b>35.18</b> | 37.06 | 34.69 | <b>36.95</b> | 39.52 | 36.70 | <b>39.50</b> | 43.05 |
| Surf                 | NA    | NA           | NA    | NA    | NA           | NA    | NA     | NA           | NA    | NA    | NA           | NA    | NA    | NA           | NA    |
| Swimming             | 29.63 | <b>31.28</b> | 32.66 | 31.91 | <b>33.11</b> | 34.20 | 33.50  | <b>34.38</b> | 35.27 | 34.57 | <b>35.66</b> | 36.86 | 36.11 | <b>37.49</b> | 39.14 |
| Tennis               | 28.27 | <b>30.86</b> | 32.93 | 30.91 | <b>32.79</b> | 34.47 | 32.74  | <b>34.13</b> | 35.53 | 33.80 | <b>35.48</b> | 37.36 | 35.34 | <b>37.41</b> | 39.99 |
| Triathlon            | 29.63 | <b>31.35</b> | 32.77 | 31.78 | <b>33.03</b> | 34.16 | 33.27  | <b>34.20</b> | 35.12 | 34.24 | <b>35.36</b> | 36.61 | 35.62 | <b>37.04</b> | 38.76 |
| Volleyball           | 30.26 | <b>33.22</b> | 35.58 | 33.16 | <b>35.32</b> | 37.24 | 35.18  | <b>36.79</b> | 38.39 | 36.33 | <b>38.25</b> | 40.41 | 37.99 | <b>40.35</b> | 43.32 |
| Wrestling and Judo   | 27.89 | <b>29.83</b> | 31.48 | 31.11 | <b>32.51</b> | 33.79 | 33.35  | <b>34.37</b> | 35.39 | 34.96 | <b>36.24</b> | 37.63 | 37.26 | <b>38.92</b> | 40.85 |

NA: data not presented for n &lt; 8.

Table 15 – Abdominal circumference (cm) percentiles by sport and sex

| Sport                | 0.05  |              |       | 0.25  |              |       | Median |              |       | 0.75  |              |        | 0.95  |               |        |
|----------------------|-------|--------------|-------|-------|--------------|-------|--------|--------------|-------|-------|--------------|--------|-------|---------------|--------|
|                      | Low   | Estimate     | High  | Low   | Estimate     | High  | Low    | Estimate     | High  | Low   | Estimate     | High   | Low   | Estimate      | High   |
| <b>Females</b>       |       |              |       |       |              |       |        |              |       |       |              |        |       |               |        |
| Archery and Shooting | NA    | NA           | NA    | NA    | NA           | NA    | NA     | NA           | NA    | NA    | NA           | NA     | NA    | NA            | NA     |
| Athletics            | 59.84 | <b>64.43</b> | 68.23 | 65.15 | <b>68.54</b> | 71.60 | 68.85  | <b>71.39</b> | 73.94 | 71.19 | <b>74.25</b> | 77.64  | 74.56 | <b>78.36</b>  | 82.95  |
| Basketball           | 63.58 | <b>68.29</b> | 72.26 | 70.12 | <b>73.56</b> | 76.69 | 74.67  | <b>77.22</b> | 79.76 | 77.75 | <b>80.88</b> | 84.31  | 82.17 | <b>86.15</b>  | 90.86  |
| Fencing              | NA    | NA           | NA    | NA    | NA           | NA    | NA     | NA           | NA    | NA    | NA           | NA     | NA    | NA            | NA     |
| Gymnastics           | 56.81 | <b>62.74</b> | 67.59 | 62.98 | <b>67.36</b> | 71.31 | 67.26  | <b>70.57</b> | 73.89 | 69.84 | <b>73.79</b> | 78.17  | 73.56 | <b>78.41</b>  | 84.34  |
| Handball             | NA    | NA           | NA    | NA    | NA           | NA    | NA     | NA           | NA    | NA    | NA           | NA     | NA    | NA            | NA     |
| Hockey Rink          | NA    | NA           | NA    | NA    | NA           | NA    | NA     | NA           | NA    | NA    | NA           | NA     | NA    | NA            | NA     |
| Korfball             | 60.79 | <b>69.90</b> | 77.20 | 68.39 | <b>75.24</b> | 81.36 | 73.67  | <b>78.96</b> | 84.25 | 76.56 | <b>82.68</b> | 89.53  | 80.72 | <b>88.02</b>  | 97.13  |
| Modern Pentathlon    | 53.90 | <b>65.55</b> | 74.84 | 63.44 | <b>72.18</b> | 79.96 | 70.06  | <b>76.79</b> | 83.52 | 73.62 | <b>81.40</b> | 90.14  | 78.74 | <b>88.03</b>  | 99.67  |
| Motorsport           | NA    | NA           | NA    | NA    | NA           | NA    | NA     | NA           | NA    | NA    | NA           | NA     | NA    | NA            | NA     |
| Other combat sports  | 62.22 | <b>69.99</b> | 76.25 | 69.09 | <b>74.91</b> | 80.11 | 73.87  | <b>78.33</b> | 82.79 | 76.56 | <b>81.75</b> | 87.57  | 80.42 | <b>86.68</b>  | 94.45  |
| Rowing               | 58.63 | <b>68.66</b> | 76.70 | 66.73 | <b>74.31</b> | 81.06 | 72.37  | <b>78.23</b> | 84.10 | 75.40 | <b>82.16</b> | 89.73  | 79.77 | <b>87.80</b>  | 97.84  |
| Rugby                | NA    | NA           | NA    | NA    | NA           | NA    | NA     | NA           | NA    | NA    | NA           | NA     | NA    | NA            | NA     |
| Sailing              | NA    | NA           | NA    | NA    | NA           | NA    | NA     | NA           | NA    | NA    | NA           | NA     | NA    | NA            | NA     |
| Soccer               | 61.01 | <b>66.41</b> | 70.86 | 67.04 | <b>71.02</b> | 74.61 | 71.23  | <b>74.22</b> | 77.21 | 73.83 | <b>77.42</b> | 81.40  | 77.58 | <b>82.03</b>  | 87.44  |
| Surf                 | NA    | NA           | NA    | NA    | NA           | NA    | NA     | NA           | NA    | NA    | NA           | NA     | NA    | NA            | NA     |
| Swimming             | 59.67 | <b>64.95</b> | 69.33 | 65.93 | <b>69.81</b> | 73.31 | 70.28  | <b>73.18</b> | 76.08 | 73.05 | <b>76.56</b> | 80.43  | 77.04 | <b>81.41</b>  | 86.69  |
| Tennis               | 62.12 | <b>71.13</b> | 78.35 | 69.90 | <b>76.64</b> | 82.65 | 75.30  | <b>80.47</b> | 85.65 | 78.29 | <b>84.30</b> | 91.05  | 82.60 | <b>89.82</b>  | 98.82  |
| Triathlon            | 56.07 | <b>66.63</b> | 75.13 | 64.30 | <b>72.30</b> | 79.49 | 70.03  | <b>76.25</b> | 82.52 | 73.06 | <b>80.19</b> | 88.25  | 77.42 | <b>85.87</b>  | 96.48  |
| Volleyball           | 61.73 | <b>69.44</b> | 75.69 | 69.48 | <b>75.18</b> | 80.28 | 74.87  | <b>79.17</b> | 83.47 | 78.06 | <b>83.16</b> | 88.85  | 82.65 | <b>88.90</b>  | 96.61  |
| Wrestling and Judo   | 57.97 | <b>64.23</b> | 69.36 | 64.91 | <b>69.50</b> | 73.63 | 69.72  | <b>73.16</b> | 76.60 | 72.69 | <b>76.82</b> | 81.41  | 76.96 | <b>82.09</b>  | 88.35  |
| <b>Males</b>         |       |              |       |       |              |       |        |              |       |       |              |        |       |               |        |
| Archery and Shooting | 49.48 | <b>66.83</b> | 79.61 | 63.56 | <b>75.85</b> | 86.31 | 73.34  | <b>82.12</b> | 90.96 | 78.00 | <b>88.40</b> | 100.75 | 84.70 | <b>97.42</b>  | 114.83 |
| Athletics            | 62.27 | <b>68.01</b> | 72.59 | 68.50 | <b>72.63</b> | 76.28 | 72.84  | <b>75.84</b> | 78.85 | 75.40 | <b>79.05</b> | 83.18  | 79.09 | <b>83.67</b>  | 89.42  |
| Basketball           | 65.70 | <b>70.70</b> | 74.90 | 73.01 | <b>76.60</b> | 79.86 | 78.10  | <b>80.70</b> | 83.31 | 81.55 | <b>84.80</b> | 88.40  | 86.51 | <b>90.70</b>  | 95.71  |
| Fencing              | 56.09 | <b>67.37</b> | 75.85 | 65.96 | <b>74.00</b> | 80.89 | 72.82  | <b>78.60</b> | 84.39 | 76.32 | <b>83.21</b> | 91.25  | 81.35 | <b>89.84</b>  | 101.11 |
| Gymnastics           | 58.20 | <b>66.27</b> | 72.59 | 66.60 | <b>72.36</b> | 77.41 | 72.44  | <b>76.60</b> | 80.76 | 75.79 | <b>80.83</b> | 86.60  | 80.60 | <b>86.92</b>  | 95.00  |
| Handball             | 60.08 | <b>70.04</b> | 77.80 | 70.34 | <b>77.42</b> | 83.61 | 77.47  | <b>82.56</b> | 87.65 | 81.51 | <b>87.69</b> | 94.77  | 87.32 | <b>95.08</b>  | 105.03 |
| Hockey Rink          | 65.80 | <b>70.98</b> | 75.31 | 73.45 | <b>77.15</b> | 80.52 | 78.76  | <b>81.45</b> | 84.13 | 82.38 | <b>85.74</b> | 89.45  | 87.58 | <b>91.92</b>  | 97.09  |
| Korfball             | 56.28 | <b>67.66</b> | 76.19 | 65.92 | <b>74.05</b> | 81.02 | 72.61  | <b>78.50</b> | 84.38 | 75.97 | <b>82.94</b> | 91.08  | 80.80 | <b>89.34</b>  | 100.71 |
| Modern Pentathlon    | 56.11 | <b>66.00</b> | 73.53 | 65.21 | <b>72.26</b> | 78.34 | 71.53  | <b>76.61</b> | 81.69 | 74.88 | <b>80.97</b> | 88.02  | 79.70 | <b>87.23</b>  | 97.11  |
| Motorsport           | NA    | NA           | NA    | NA    | NA           | NA    | NA     | NA           | NA    | NA    | NA           | NA     | NA    | NA            | NA     |
| Other combat sports  | 63.15 | <b>68.67</b> | 73.13 | 69.59 | <b>73.56</b> | 77.10 | 74.07  | <b>76.97</b> | 79.86 | 76.83 | <b>80.37</b> | 84.34  | 80.80 | <b>85.26</b>  | 90.79  |
| Rowing               | 61.61 | <b>69.03</b> | 74.97 | 70.29 | <b>75.58</b> | 80.27 | 76.32  | <b>80.14</b> | 83.96 | 80.01 | <b>84.70</b> | 89.99  | 85.31 | <b>91.25</b>  | 98.68  |
| Rugby                | 63.86 | <b>71.21</b> | 77.46 | 76.21 | <b>81.43</b> | 86.21 | 84.79  | <b>88.54</b> | 92.28 | 90.87 | <b>95.64</b> | 100.86 | 99.61 | <b>105.86</b> | 113.21 |
| Sailing              | 61.38 | <b>69.02</b> | 75.26 | 71.63 | <b>77.05</b> | 81.90 | 78.75  | <b>82.64</b> | 86.52 | 83.37 | <b>88.22</b> | 93.64  | 90.01 | <b>96.25</b>  | 103.89 |
| Soccer               | 59.77 | <b>68.72</b> | 75.66 | 68.55 | <b>74.94</b> | 80.51 | 74.65  | <b>79.27</b> | 83.89 | 78.02 | <b>83.59</b> | 89.99  | 82.88 | <b>89.82</b>  | 98.76  |
| Surf                 | NA    | NA           | NA    | NA    | NA           | NA    | NA     | NA           | NA    | NA    | NA           | NA     | NA    | NA            | NA     |
| Swimming             | 63.41 | <b>68.45</b> | 72.63 | 70.42 | <b>74.03</b> | 77.29 | 75.29  | <b>77.91</b> | 80.53 | 78.53 | <b>81.79</b> | 85.40  | 83.19 | <b>87.37</b>  | 92.41  |
| Tennis               | 61.96 | <b>69.47</b> | 75.34 | 69.56 | <b>74.94</b> | 79.66 | 74.84  | <b>78.75</b> | 82.65 | 77.84 | <b>82.55</b> | 87.93  | 82.15 | <b>88.03</b>  | 95.53  |
| Triathlon            | 63.19 | <b>68.04</b> | 72.01 | 69.22 | <b>72.72</b> | 75.86 | 73.42  | <b>75.97</b> | 78.53 | 76.09 | <b>79.22</b> | 82.72  | 79.93 | <b>83.90</b>  | 88.76  |
| Volleyball           | 64.47 | <b>73.69</b> | 80.83 | 73.51 | <b>80.09</b> | 85.83 | 79.79  | <b>84.54</b> | 89.30 | 83.26 | <b>89.00</b> | 95.58  | 88.26 | <b>95.40</b>  | 104.62 |
| Wrestling and Judo   | 62.97 | <b>67.21</b> | 70.79 | 69.98 | <b>73.04</b> | 75.80 | 74.86  | <b>77.10</b> | 79.28 | 78.35 | <b>81.15</b> | 84.16  | 83.35 | <b>86.99</b>  | 91.18  |

NA: data not presented for n &lt; 8.



Table 16 – Hip circumference (cm) percentiles by sport and sex

| Sport                | 0.05  |              |        | 0.25  |               |        | Median |               |        | 0.75   |               |        | 0.95   |               |        |
|----------------------|-------|--------------|--------|-------|---------------|--------|--------|---------------|--------|--------|---------------|--------|--------|---------------|--------|
|                      | Low   | Estimate     | High   | Low   | Estimate      | High   | Low    | Estimate      | High   | Low    | Estimate      | High   | Low    | Estimate      | High   |
| <b>Females</b>       |       |              |        |       |               |        |        |               |        |        |               |        |        |               |        |
| Archery and Shooting | NA    | NA           | NA     | NA    | NA            | NA     | NA     | NA            | NA     | NA     | NA            | NA     | NA     | NA            | NA     |
| Athletics            | 80.60 | <b>84.11</b> | 87.47  | 85.93 | <b>88.95</b>  | 91.91  | 89.64  | <b>92.31</b>  | 94.99  | 92.72  | <b>95.68</b>  | 98.69  | 97.16  | <b>100.52</b> | 104.03 |
| Basketball           | 89.25 | <b>92.40</b> | 95.41  | 94.78 | <b>97.44</b>  | 100.04 | 98.62  | <b>100.94</b> | 103.26 | 101.83 | <b>104.44</b> | 107.10 | 106.46 | <b>109.47</b> | 112.62 |
| Fencing              | NA    | NA           | NA     | NA    | NA            | NA     | NA     | NA            | NA     | NA     | NA            | NA     | NA     | NA            | NA     |
| Gymnastics           | 79.56 | <b>83.60</b> | 87.48  | 85.06 | <b>88.58</b>  | 92.04  | 88.89  | <b>92.05</b>  | 95.21  | 92.06  | <b>95.51</b>  | 99.03  | 96.62  | <b>100.50</b> | 104.54 |
| Handball             | NA    | NA           | NA     | NA    | NA            | NA     | NA     | NA            | NA     | NA     | NA            | NA     | NA     | NA            | NA     |
| Hockey Rink          | NA    | NA           | NA     | NA    | NA            | NA     | NA     | NA            | NA     | NA     | NA            | NA     | NA     | NA            | NA     |
| Korfball             | 80.01 | <b>85.18</b> | 90.19  | 85.47 | <b>90.11</b>  | 94.68  | 89.27  | <b>93.54</b>  | 97.81  | 92.40  | <b>96.97</b>  | 101.61 | 96.90  | <b>101.90</b> | 107.08 |
| Modern Pentathlon    | 80.63 | <b>86.04</b> | 91.28  | 86.11 | <b>90.98</b>  | 95.78  | 89.92  | <b>94.42</b>  | 98.92  | 93.05  | <b>97.85</b>  | 102.73 | 97.56  | <b>102.80</b> | 108.21 |
| Motorsport           | NA    | NA           | NA     | NA    | NA            | NA     | NA     | NA            | NA     | NA     | NA            | NA     | NA     | NA            | NA     |
| Other combat sports  | 81.12 | <b>85.93</b> | 90.51  | 86.54 | <b>90.83</b>  | 94.99  | 90.31  | <b>94.24</b>  | 98.10  | 93.42  | <b>97.64</b>  | 101.87 | 97.89  | <b>102.54</b> | 107.29 |
| Rowing               | 82.66 | <b>88.09</b> | 93.36  | 88.13 | <b>93.03</b>  | 97.86  | 91.93  | <b>96.46</b>  | 100.99 | 95.05  | <b>99.89</b>  | 104.79 | 99.55  | <b>104.82</b> | 110.26 |
| Rugby                | NA    | NA           | NA     | NA    | NA            | NA     | NA     | NA            | NA     | NA     | NA            | NA     | NA     | NA            | NA     |
| Sailing              | NA    | NA           | NA     | NA    | NA            | NA     | NA     | NA            | NA     | NA     | NA            | NA     | NA     | NA            | NA     |
| Soccer               | 83.52 | <b>87.30</b> | 90.92  | 89.05 | <b>92.31</b>  | 95.51  | 92.89  | <b>95.79</b>  | 98.70  | 96.08  | <b>99.27</b>  | 102.54 | 100.66 | <b>104.29</b> | 108.06 |
| Surf                 | NA    | NA           | NA     | NA    | NA            | NA     | NA     | NA            | NA     | NA     | NA            | NA     | NA     | NA            | NA     |
| Swimming             | 82.49 | <b>85.92</b> | 89.21  | 87.81 | <b>90.76</b>  | 93.64  | 91.52  | <b>94.12</b>  | 96.72  | 94.59  | <b>97.48</b>  | 100.42 | 99.02  | <b>102.31</b> | 105.75 |
| Tennis               | 84.83 | <b>89.81</b> | 94.63  | 90.28 | <b>94.74</b>  | 99.12  | 94.07  | <b>98.16</b>  | 102.25 | 97.20  | <b>101.59</b> | 106.04 | 101.69 | <b>106.51</b> | 111.49 |
| Triathlon            | 78.88 | <b>84.53</b> | 90.06  | 84.34 | <b>89.45</b>  | 94.54  | 88.13  | <b>92.87</b>  | 97.66  | 91.25  | <b>96.28</b>  | 101.45 | 95.73  | <b>101.20</b> | 106.91 |
| Volleyball           | 88.24 | <b>92.62</b> | 96.76  | 93.86 | <b>97.71</b>  | 101.42 | 97.77  | <b>101.24</b> | 104.65 | 101.00 | <b>104.78</b> | 108.56 | 105.66 | <b>109.87</b> | 114.18 |
| Wrestling and Judo   | 82.11 | <b>85.89</b> | 89.52  | 87.55 | <b>90.82</b>  | 94.03  | 91.33  | <b>94.25</b>  | 97.17  | 94.47  | <b>97.68</b>  | 100.96 | 98.99  | <b>102.62</b> | 106.40 |
| <b>Males</b>         |       |              |        |       |               |        |        |               |        |        |               |        |        |               |        |
| Archery and Shooting | 79.74 | <b>87.90</b> | 94.55  | 86.43 | <b>92.66</b>  | 98.27  | 91.08  | <b>95.97</b>  | 100.86 | 93.66  | <b>99.27</b>  | 105.50 | 97.39  | <b>104.03</b> | 112.19 |
| Athletics            | 83.42 | <b>88.31</b> | 92.37  | 88.88 | <b>92.52</b>  | 95.82  | 92.68  | <b>95.45</b>  | 98.21  | 95.08  | <b>98.37</b>  | 102.01 | 98.52  | <b>102.58</b> | 107.47 |
| Basketball           | 86.43 | <b>90.66</b> | 94.29  | 92.63 | <b>95.75</b>  | 98.63  | 96.94  | <b>99.29</b>  | 101.64 | 99.95  | <b>102.83</b> | 105.95 | 104.28 | <b>107.91</b> | 112.15 |
| Fencing              | 78.82 | <b>87.03</b> | 93.72  | 86.26 | <b>92.44</b>  | 98.00  | 91.43  | <b>96.21</b>  | 100.98 | 94.41  | <b>99.97</b>  | 106.16 | 98.70  | <b>105.39</b> | 113.60 |
| Gymnastics           | 78.19 | <b>84.09</b> | 88.97  | 84.50 | <b>88.90</b>  | 92.88  | 88.89  | <b>92.24</b>  | 95.59  | 91.61  | <b>95.59</b>  | 99.98  | 95.51  | <b>100.39</b> | 106.30 |
| Handball             | 84.23 | <b>90.97</b> | 96.53  | 91.30 | <b>96.33</b>  | 100.87 | 96.22  | <b>100.05</b> | 103.88 | 99.23  | <b>103.77</b> | 108.80 | 103.57 | <b>109.13</b> | 115.87 |
| Hockey Rink          | 86.10 | <b>89.93</b> | 93.21  | 91.76 | <b>94.58</b>  | 97.18  | 95.70  | <b>97.82</b>  | 99.94  | 98.46  | <b>101.06</b> | 103.88 | 102.43 | <b>105.71</b> | 109.54 |
| Korfball             | 77.25 | <b>85.30</b> | 91.85  | 84.32 | <b>90.41</b>  | 95.88  | 89.23  | <b>93.96</b>  | 98.69  | 92.03  | <b>97.51</b>  | 103.60 | 96.06  | <b>102.62</b> | 110.67 |
| Modern Pentathlon    | 78.05 | <b>85.26</b> | 91.15  | 84.91 | <b>90.32</b>  | 95.18  | 89.67  | <b>93.83</b>  | 97.99  | 92.48  | <b>97.35</b>  | 102.75 | 96.51  | <b>102.40</b> | 109.61 |
| Motorsport           | NA    | NA           | NA     | NA    | NA            | NA     | NA     | NA            | NA     | NA     | NA            | NA     | NA     | NA            | NA     |
| Other combat sports  | 83.41 | <b>87.72</b> | 91.33  | 88.62 | <b>91.81</b>  | 94.73  | 92.23  | <b>94.66</b>  | 97.09  | 94.59  | <b>97.51</b>  | 100.71 | 97.99  | <b>101.60</b> | 105.91 |
| Rowing               | 82.97 | <b>88.29</b> | 92.74  | 89.28 | <b>93.23</b>  | 96.82  | 93.66  | <b>96.66</b>  | 99.65  | 96.50  | <b>100.09</b> | 104.04 | 100.57 | <b>105.02</b> | 110.35 |
| Rugby                | 86.08 | <b>91.45</b> | 96.08  | 95.11 | <b>99.01</b>  | 102.60 | 101.38 | <b>104.26</b> | 107.14 | 105.91 | <b>109.51</b> | 113.41 | 112.44 | <b>117.07</b> | 122.43 |
| Sailing              | 81.73 | <b>87.05</b> | 91.55  | 88.91 | <b>92.82</b>  | 96.40  | 93.90  | <b>96.83</b>  | 99.77  | 97.26  | <b>100.84</b> | 104.76 | 102.11 | <b>106.61</b> | 111.94 |
| Soccer               | 80.63 | <b>87.25</b> | 92.70  | 87.31 | <b>92.27</b>  | 96.74  | 91.96  | <b>95.75</b>  | 99.55  | 94.76  | <b>99.24</b>  | 104.19 | 98.80  | <b>104.25</b> | 110.87 |
| Surf                 | NA    | NA           | NA     | NA    | NA            | NA     | NA     | NA            | NA     | NA     | NA            | NA     | NA     | NA            | NA     |
| Swimming             | 82.85 | <b>86.74</b> | 90.06  | 88.29 | <b>91.16</b>  | 93.80  | 92.06  | <b>94.23</b>  | 96.40  | 94.66  | <b>97.30</b>  | 100.17 | 98.40  | <b>101.72</b> | 105.60 |
| Tennis               | 80.79 | <b>86.40</b> | 91.04  | 86.61 | <b>90.81</b>  | 94.61  | 90.66  | <b>93.88</b>  | 97.10  | 93.14  | <b>96.95</b>  | 101.14 | 96.72  | <b>101.36</b> | 106.96 |
| Triathlon            | 77.69 | <b>82.40</b> | 86.37  | 83.72 | <b>87.20</b>  | 90.37  | 87.91  | <b>90.54</b>  | 93.16  | 90.70  | <b>93.87</b>  | 97.35  | 94.71  | <b>98.68</b>  | 103.39 |
| Volleyball           | 90.64 | <b>96.01</b> | 100.45 | 95.98 | <b>100.03</b> | 103.68 | 99.70  | <b>102.82</b> | 105.93 | 101.95 | <b>105.61</b> | 109.65 | 105.19 | <b>109.62</b> | 115.00 |
| Wrestling and Judo   | 81.70 | <b>85.15</b> | 88.16  | 87.44 | <b>89.98</b>  | 92.33  | 91.43  | <b>93.33</b>  | 95.23  | 94.33  | <b>96.68</b>  | 99.22  | 98.51  | <b>101.51</b> | 104.96 |

NA: data not presented for n &lt; 8.
