# Supplementary material for: Reference Values for Body Composition and Anthropometric Measurements in Athletes
Source: PubMed Central journal article supplement (PMC4022746; doi:10.1371/journal.pone.0097846), 2014-05-15
Supplement: pone.0097846.s002.pdf [file pone.0097846.s002.pdf]

## Supporting Information 2 (SI2):

### Dual Energy X-ray Absorptiometry variables percentiles by sport and sex

#### Contents

|                                                                                                               |    |
|---------------------------------------------------------------------------------------------------------------|----|
| Table 1 – Whole-body bone mineral content (g) percentiles by sport and sex .....                              | 1  |
| Table 2 – Whole-body bone mineral density ( $\text{g}/\text{cm}^3$ ) percentiles by sport and sex .....       | 2  |
| Table 3 – Whole-body fat mass (kg) percentiles by sport and sex.....                                          | 3  |
| Table 4 – Whole-body fat mass index ( $\text{kg}/\text{m}^2$ ) percentiles by sport and sex .....             | 4  |
| Table 5 – Whole body fat mass (%) percentiles by sport and sex .....                                          | 5  |
| Table 6 – Whole-body fat-free mass (kg) percentiles by sport and sex .....                                    | 6  |
| Table 7 – Whole-body fat-free mass index ( $\text{kg}/\text{m}^2$ ) percentiles by sport and sex .....        | 7  |
| Table 8 – Whole-body lean soft tissue (kg) percentiles by sport and sex .....                                 | 8  |
| Table 9 – Subtotal* bone mineral content (g) percentiles by sport and sex .....                               | 9  |
| Table 10 – Subtotal* fat mass (kg) percentiles by sport and sex.....                                          | 10 |
| Table 11 – Subtotal* fat mass (%) percentiles by sport and sex.....                                           | 11 |
| Table 12 – Subtotal* fat-free mass (kg) percentiles by sport and sex .....                                    | 12 |
| Table 13 – Subtotal* lean soft tissue (kg) percentiles by sport and sex .....                                 | 13 |
| Table 14 – Appendicular* bone mineral content (g) percentiles by sport and sex .....                          | 14 |
| Table 15 – Appendicular* fat-mass (kg) percentiles by sport and sex.....                                      | 15 |
| Table 16 – Appendicular* fat mass (%) percentiles by sport and sex.....                                       | 16 |
| Table 17 – Appendicular* fat-free mass (kg) percentiles by sport and sex .....                                | 17 |
| Table 18 – Appendicular* lean soft tissue (kg) percentiles by sport and sex .....                             | 18 |
| Table 19 – Appendicular* lean soft tissue index ( $\text{kg}/\text{m}^2$ ) percentiles by sport and sex ..... | 19 |
| Table 20 – Trunk bone mineral content (g) percentiles by sport and sex.....                                   | 20 |
| Table 21 – Trunk fat mass (kg) percentiles by sport and sex .....                                             | 21 |
| Table 22 – Trunk fat mass (%) percentiles by sport and sex .....                                              | 22 |
| Table 23 – Trunk fat-free mass (kg) percentiles by sport and sex.....                                         | 23 |
| Table 24 – Trunk lean soft tissue (kg) percentiles by sport and sex.....                                      | 24 |

Table 1 – Whole-body bone mineral content (g) percentiles by sport and sex

| Sport                | 0.05 |          |      | 0.25 |          |      | Median |          |      | 0.75 |          |      | 0.95 |          |      |
|----------------------|------|----------|------|------|----------|------|--------|----------|------|------|----------|------|------|----------|------|
|                      | Low  | Estimate | High | Low  | Estimate | High | Low    | Estimate | High | Low  | Estimate | High | Low  | Estimate | High |
| <b>Females</b>       |      |          |      |      |          |      |        |          |      |      |          |      |      |          |      |
| Archery and Shooting | NA   | NA       | NA   | NA   | NA       | NA   | NA     | NA       | NA   | NA   | NA       | NA   | NA   | NA       | NA   |
| Athletics            | 967  | 1692     | 2264 | 1741 | 2257     | 2711 | 2279   | 2650     | 3022 | 2590 | 3043     | 3560 | 3037 | 3609     | 4334 |
| Basketball           | 1265 | 1757     | 2163 | 1958 | 2305     | 2618 | 2440   | 2686     | 2934 | 2756 | 3067     | 3416 | 3211 | 3615     | 4109 |
| Fencing              | NA   | NA       | NA   | NA   | NA       | NA   | NA     | NA       | NA   | NA   | NA       | NA   | NA   | NA       | NA   |
| Gymnastics           | 280  | 1182     | 1879 | 1169 | 1810     | 2365 | 1787   | 2246     | 2703 | 2125 | 2682     | 3321 | 2612 | 3310     | 4211 |
| Handball             | NA   | NA       | NA   | NA   | NA       | NA   | NA     | NA       | NA   | NA   | NA       | NA   | NA   | NA       | NA   |
| Hockey Rink          | NA   | NA       | NA   | NA   | NA       | NA   | NA     | NA       | NA   | NA   | NA       | NA   | NA   | NA       | NA   |
| Korfball             | NA   | NA       | NA   | NA   | NA       | NA   | NA     | NA       | NA   | NA   | NA       | NA   | NA   | NA       | NA   |
| Modern Pentathlon    | NA   | NA       | NA   | NA   | NA       | NA   | NA     | NA       | NA   | NA   | NA       | NA   | NA   | NA       | NA   |
| Motorsport           | NA   | NA       | NA   | NA   | NA       | NA   | NA     | NA       | NA   | NA   | NA       | NA   | NA   | NA       | NA   |
| Other combat sports  | NA   | NA       | NA   | NA   | NA       | NA   | NA     | NA       | NA   | NA   | NA       | NA   | NA   | NA       | NA   |
| Rowing               | NA   | NA       | NA   | NA   | NA       | NA   | NA     | NA       | NA   | NA   | NA       | NA   | NA   | NA       | NA   |
| Rugby                | NA   | NA       | NA   | NA   | NA       | NA   | NA     | NA       | NA   | NA   | NA       | NA   | NA   | NA       | NA   |
| Sailing              | NA   | NA       | NA   | NA   | NA       | NA   | NA     | NA       | NA   | NA   | NA       | NA   | NA   | NA       | NA   |
| Soccer               | NA   | NA       | NA   | NA   | NA       | NA   | NA     | NA       | NA   | NA   | NA       | NA   | NA   | NA       | NA   |
| Surf                 | NA   | NA       | NA   | NA   | NA       | NA   | NA     | NA       | NA   | NA   | NA       | NA   | NA   | NA       | NA   |
| Swimming             | 731  | 1326     | 1801 | 1444 | 1863     | 2233 | 1939   | 2237     | 2534 | 2240 | 2610     | 3030 | 2672 | 3147     | 3743 |
| Tennis               | NA   | NA       | NA   | NA   | NA       | NA   | NA     | NA       | NA   | NA   | NA       | NA   | NA   | NA       | NA   |
| Triathlon            | 169  | 1148     | 1902 | 1084 | 1782     | 2388 | 1720   | 2223     | 2725 | 2058 | 2663     | 3362 | 2544 | 3298     | 4277 |
| Volleyball           | 1027 | 1731     | 2288 | 1778 | 2281     | 2723 | 2300   | 2663     | 3026 | 2603 | 3045     | 3548 | 3038 | 3595     | 4299 |
| Wrestling and Judo   | 822  | 1577     | 2171 | 1614 | 2152     | 2624 | 2165   | 2552     | 2938 | 2480 | 2951     | 3489 | 2932 | 3526     | 4281 |
| <b>Males</b>         |      |          |      |      |          |      |        |          |      |      |          |      |      |          |      |
| Archery and Shooting | NA   | NA       | NA   | NA   | NA       | NA   | NA     | NA       | NA   | NA   | NA       | NA   | NA   | NA       | NA   |
| Athletics            | 1656 | 2214     | 2686 | 2210 | 2638     | 3030 | 2596   | 2933     | 3270 | 2835 | 3227     | 3655 | 3179 | 3651     | 4210 |
| Basketball           | 2092 | 2453     | 2765 | 2673 | 2937     | 3180 | 3078   | 3273     | 3468 | 3366 | 3609     | 3872 | 3781 | 4093     | 4454 |
| Fencing              | NA   | NA       | NA   | NA   | NA       | NA   | NA     | NA       | NA   | NA   | NA       | NA   | NA   | NA       | NA   |
| Gymnastics           | NA   | NA       | NA   | NA   | NA       | NA   | NA     | NA       | NA   | NA   | NA       | NA   | NA   | NA       | NA   |
| Handball             | 2112 | 2500     | 2831 | 2681 | 2967     | 3227 | 3077   | 3291     | 3502 | 3352 | 3615     | 3898 | 3748 | 4081     | 4467 |
| Hockey Rink          | NA   | NA       | NA   | NA   | NA       | NA   | NA     | NA       | NA   | NA   | NA       | NA   | NA   | NA       | NA   |
| Korfball             | NA   | NA       | NA   | NA   | NA       | NA   | NA     | NA       | NA   | NA   | NA       | NA   | NA   | NA       | NA   |
| Modern Pentathlon    | NA   | NA       | NA   | NA   | NA       | NA   | NA     | NA       | NA   | NA   | NA       | NA   | NA   | NA       | NA   |
| Motorsport           | NA   | NA       | NA   | NA   | NA       | NA   | NA     | NA       | NA   | NA   | NA       | NA   | NA   | NA       | NA   |
| Other combat sports  | 1523 | 2045     | 2484 | 2071 | 2466     | 2828 | 2452   | 2760     | 3068 | 2691 | 3053     | 3449 | 3035 | 3475     | 3997 |
| Rowing               | NA   | NA       | NA   | NA   | NA       | NA   | NA     | NA       | NA   | NA   | NA       | NA   | NA   | NA       | NA   |
| Rugby                | 2240 | 2590     | 2891 | 2768 | 3025     | 3261 | 3135   | 3327     | 3519 | 3393 | 3629     | 3886 | 3764 | 4064     | 4414 |
| Sailing              | NA   | NA       | NA   | NA   | NA       | NA   | NA     | NA       | NA   | NA   | NA       | NA   | NA   | NA       | NA   |
| Soccer               | 1953 | 2305     | 2606 | 2425 | 2686     | 2925 | 2752   | 2950     | 3147 | 2975 | 3214     | 3475 | 3294 | 3595     | 3947 |
| Surf                 | NA   | NA       | NA   | NA   | NA       | NA   | NA     | NA       | NA   | NA   | NA       | NA   | NA   | NA       | NA   |
| Swimming             | 1504 | 1856     | 2157 | 2025 | 2283     | 2520 | 2388   | 2580     | 2771 | 2640 | 2877     | 3134 | 3002 | 3304     | 3656 |
| Tennis               | 1371 | 1870     | 2293 | 1869 | 2251     | 2601 | 2214   | 2515     | 2816 | 2429 | 2779     | 3161 | 2737 | 3159     | 3659 |
| Triathlon            | 1586 | 1861     | 2096 | 1998 | 2199     | 2384 | 2284   | 2434     | 2584 | 2483 | 2668     | 2870 | 2771 | 3006     | 3281 |
| Volleyball           | 2300 | 2854     | 3323 | 2928 | 3345     | 3728 | 3364   | 3687     | 4010 | 3645 | 4028     | 4446 | 4050 | 4519     | 5073 |
| Wrestling and Judo   | 1999 | 2312     | 2581 | 2497 | 2726     | 2936 | 2844   | 3013     | 3183 | 3090 | 3301     | 3529 | 3445 | 3715     | 4028 |

NA: data not presented for n &lt; 8.

Table 2 – Whole-body bone mineral density (g/cm<sup>3</sup>) percentiles by sport and sex

| Sport                | 0.05  |              |       | 0.25  |              |       | Median |              |       | 0.75  |              |       | 0.95  |              |       |
|----------------------|-------|--------------|-------|-------|--------------|-------|--------|--------------|-------|-------|--------------|-------|-------|--------------|-------|
|                      | Low   | Estimate     | High  | Low   | Estimate     | High  | Low    | Estimate     | High  | Low   | Estimate     | High  | Low   | Estimate     | High  |
| <b>Females</b>       |       |              |       |       |              |       |        |              |       |       |              |       |       |              |       |
| Archery and Shooting | NA    | NA           | NA    | NA    | NA           | NA    | NA     | NA           | NA    | NA    | NA           | NA    | NA    | NA           | NA    |
| Athletics            | 0.863 | <b>0.997</b> | 1.115 | 1.015 | <b>1.121</b> | 1.221 | 1.137  | <b>1.216</b> | 1.301 | 1.211 | <b>1.319</b> | 1.457 | 1.327 | <b>1.483</b> | 1.714 |
| Basketball           | 0.883 | <b>0.979</b> | 1.063 | 1.026 | <b>1.100</b> | 1.169 | 1.139  | <b>1.193</b> | 1.249 | 1.217 | <b>1.293</b> | 1.387 | 1.338 | <b>1.453</b> | 1.612 |
| Fencing              | NA    | NA           | NA    | NA    | NA           | NA    | NA     | NA           | NA    | NA    | NA           | NA    | NA    | NA           | NA    |
| Gymnastics           | 0.781 | <b>0.908</b> | 1.013 | 0.911 | <b>1.007</b> | 1.095 | 1.014  | <b>1.083</b> | 1.156 | 1.071 | <b>1.164</b> | 1.287 | 1.157 | <b>1.291</b> | 1.501 |
| Handball             | NA    | NA           | NA    | NA    | NA           | NA    | NA     | NA           | NA    | NA    | NA           | NA    | NA    | NA           | NA    |
| Hockey Rink          | NA    | NA           | NA    | NA    | NA           | NA    | NA     | NA           | NA    | NA    | NA           | NA    | NA    | NA           | NA    |
| Korfball             | NA    | NA           | NA    | NA    | NA           | NA    | NA     | NA           | NA    | NA    | NA           | NA    | NA    | NA           | NA    |
| Modern Pentathlon    | NA    | NA           | NA    | NA    | NA           | NA    | NA     | NA           | NA    | NA    | NA           | NA    | NA    | NA           | NA    |
| Motorsport           | NA    | NA           | NA    | NA    | NA           | NA    | NA     | NA           | NA    | NA    | NA           | NA    | NA    | NA           | NA    |
| Other combat sports  | NA    | NA           | NA    | NA    | NA           | NA    | NA     | NA           | NA    | NA    | NA           | NA    | NA    | NA           | NA    |
| Rowing               | NA    | NA           | NA    | NA    | NA           | NA    | NA     | NA           | NA    | NA    | NA           | NA    | NA    | NA           | NA    |
| Rugby                | NA    | NA           | NA    | NA    | NA           | NA    | NA     | NA           | NA    | NA    | NA           | NA    | NA    | NA           | NA    |
| Sailing              | NA    | NA           | NA    | NA    | NA           | NA    | NA     | NA           | NA    | NA    | NA           | NA    | NA    | NA           | NA    |
| Soccer               | NA    | NA           | NA    | NA    | NA           | NA    | NA     | NA           | NA    | NA    | NA           | NA    | NA    | NA           | NA    |
| Surf                 | NA    | NA           | NA    | NA    | NA           | NA    | NA     | NA           | NA    | NA    | NA           | NA    | NA    | NA           | NA    |
| Swimming             | 0.847 | <b>0.932</b> | 1.001 | 0.953 | <b>1.015</b> | 1.070 | 1.034  | <b>1.077</b> | 1.121 | 1.084 | <b>1.143</b> | 1.217 | 1.159 | <b>1.245</b> | 1.369 |
| Tennis               | NA    | NA           | NA    | NA    | NA           | NA    | NA     | NA           | NA    | NA    | NA           | NA    | NA    | NA           | NA    |
| Triathlon            | 0.767 | <b>0.888</b> | 0.985 | 0.883 | <b>0.973</b> | 1.053 | 0.974  | <b>1.036</b> | 1.102 | 1.020 | <b>1.104</b> | 1.216 | 1.091 | <b>1.210</b> | 1.401 |
| Volleyball           | 0.861 | <b>0.981</b> | 1.084 | 0.997 | <b>1.090</b> | 1.177 | 1.104  | <b>1.173</b> | 1.246 | 1.169 | <b>1.262</b> | 1.380 | 1.269 | <b>1.403</b> | 1.599 |
| Wrestling and Judo   | 0.876 | <b>1.003</b> | 1.112 | 1.016 | <b>1.115</b> | 1.207 | 1.127  | <b>1.200</b> | 1.278 | 1.193 | <b>1.292</b> | 1.417 | 1.295 | <b>1.436</b> | 1.643 |
| <b>Males</b>         |       |              |       |       |              |       |        |              |       |       |              |       |       |              |       |
| Archery and Shooting | NA    | NA           | NA    | NA    | NA           | NA    | NA     | NA           | NA    | NA    | NA           | NA    | NA    | NA           | NA    |
| Athletics            | 1.030 | <b>1.137</b> | 1.237 | 1.147 | <b>1.236</b> | 1.325 | 1.235  | <b>1.310</b> | 1.390 | 1.295 | <b>1.388</b> | 1.497 | 1.387 | <b>1.509</b> | 1.666 |
| Basketball           | 1.026 | <b>1.097</b> | 1.161 | 1.152 | <b>1.208</b> | 1.261 | 1.248  | <b>1.291</b> | 1.336 | 1.322 | <b>1.381</b> | 1.447 | 1.436 | <b>1.520</b> | 1.624 |
| Fencing              | NA    | NA           | NA    | NA    | NA           | NA    | NA     | NA           | NA    | NA    | NA           | NA    | NA    | NA           | NA    |
| Gymnastics           | NA    | NA           | NA    | NA    | NA           | NA    | NA     | NA           | NA    | NA    | NA           | NA    | NA    | NA           | NA    |
| Handball             | 1.095 | <b>1.165</b> | 1.228 | 1.207 | <b>1.263</b> | 1.316 | 1.292  | <b>1.335</b> | 1.380 | 1.355 | <b>1.412</b> | 1.476 | 1.451 | <b>1.530</b> | 1.627 |
| Hockey Rink          | NA    | NA           | NA    | NA    | NA           | NA    | NA     | NA           | NA    | NA    | NA           | NA    | NA    | NA           | NA    |
| Korfball             | NA    | NA           | NA    | NA    | NA           | NA    | NA     | NA           | NA    | NA    | NA           | NA    | NA    | NA           | NA    |
| Modern Pentathlon    | NA    | NA           | NA    | NA    | NA           | NA    | NA     | NA           | NA    | NA    | NA           | NA    | NA    | NA           | NA    |
| Motorsport           | NA    | NA           | NA    | NA    | NA           | NA    | NA     | NA           | NA    | NA    | NA           | NA    | NA    | NA           | NA    |
| Other combat sports  | 0.989 | <b>1.085</b> | 1.174 | 1.100 | <b>1.180</b> | 1.258 | 1.185  | <b>1.250</b> | 1.319 | 1.243 | <b>1.325</b> | 1.421 | 1.331 | <b>1.440</b> | 1.581 |
| Rowing               | NA    | NA           | NA    | NA    | NA           | NA    | NA     | NA           | NA    | NA    | NA           | NA    | NA    | NA           | NA    |
| Rugby                | 1.121 | <b>1.192</b> | 1.256 | 1.238 | <b>1.294</b> | 1.348 | 1.326  | <b>1.371</b> | 1.416 | 1.393 | <b>1.452</b> | 1.518 | 1.495 | <b>1.577</b> | 1.676 |
| Sailing              | NA    | NA           | NA    | NA    | NA           | NA    | NA     | NA           | NA    | NA    | NA           | NA    | NA    | NA           | NA    |
| Soccer               | 1.096 | <b>1.170</b> | 1.236 | 1.204 | <b>1.263</b> | 1.319 | 1.285  | <b>1.332</b> | 1.380 | 1.344 | <b>1.405</b> | 1.473 | 1.435 | <b>1.517</b> | 1.618 |
| Surf                 | NA    | NA           | NA    | NA    | NA           | NA    | NA     | NA           | NA    | NA    | NA           | NA    | NA    | NA           | NA    |
| Swimming             | 0.926 | <b>0.993</b> | 1.054 | 1.037 | <b>1.089</b> | 1.139 | 1.121  | <b>1.161</b> | 1.202 | 1.184 | <b>1.238</b> | 1.301 | 1.279 | <b>1.357</b> | 1.456 |
| Tennis               | 0.948 | <b>1.042</b> | 1.128 | 1.051 | <b>1.128</b> | 1.203 | 1.129  | <b>1.192</b> | 1.258 | 1.181 | <b>1.260</b> | 1.352 | 1.260 | <b>1.364</b> | 1.499 |
| Triathlon            | 0.947 | <b>1.005</b> | 1.057 | 1.044 | <b>1.088</b> | 1.130 | 1.116  | <b>1.150</b> | 1.184 | 1.170 | <b>1.215</b> | 1.267 | 1.251 | <b>1.315</b> | 1.395 |
| Volleyball           | 1.109 | <b>1.204</b> | 1.293 | 1.227 | <b>1.306</b> | 1.383 | 1.317  | <b>1.382</b> | 1.450 | 1.381 | <b>1.462</b> | 1.556 | 1.477 | <b>1.586</b> | 1.723 |
| Wrestling and Judo   | 1.097 | <b>1.166</b> | 1.230 | 1.219 | <b>1.274</b> | 1.327 | 1.311  | <b>1.354</b> | 1.399 | 1.382 | <b>1.440</b> | 1.505 | 1.491 | <b>1.572</b> | 1.672 |

NA: data not presented for n &lt; 8.

Table 3 – Whole-body fat mass (kg) percentiles by sport and sex

| Sport                | 0.05 |              |       | 0.25  |              |       | Median |              |       | 0.75  |              |       | 0.95  |              |       |
|----------------------|------|--------------|-------|-------|--------------|-------|--------|--------------|-------|-------|--------------|-------|-------|--------------|-------|
|                      | Low  | Estimate     | High  | Low   | Estimate     | High  | Low    | Estimate     | High  | Low   | Estimate     | High  | Low   | Estimate     | High  |
| <b>Females</b>       |      |              |       |       |              |       |        |              |       |       |              |       |       |              |       |
| Archery and Shooting | NA   | NA           | NA    | NA    | NA           | NA    | NA     | NA           | NA    | NA    | NA           | NA    | NA    | NA           | NA    |
| Athletics            | 5.42 | <b>7.64</b>  | 9.95  | 7.33  | <b>9.41</b>  | 11.68 | 9.05   | <b>10.87</b> | 13.05 | 10.12 | <b>12.56</b> | 16.11 | 11.87 | <b>15.46</b> | 21.82 |
| Basketball           | 8.41 | <b>10.91</b> | 13.49 | 11.52 | <b>13.91</b> | 16.47 | 14.32  | <b>16.46</b> | 18.92 | 16.45 | <b>19.49</b> | 23.53 | 20.08 | <b>24.84</b> | 32.21 |
| Fencing              | NA   | NA           | NA    | NA    | NA           | NA    | NA     | NA           | NA    | NA    | NA           | NA    | NA    | NA           | NA    |
| Gymnastics           | 4.47 | <b>7.34</b>  | 10.61 | 6.66  | <b>9.51</b>  | 12.89 | 8.80   | <b>11.39</b> | 14.75 | 10.07 | <b>13.64</b> | 19.47 | 12.22 | <b>17.68</b> | 29.05 |
| Handball             | NA   | NA           | NA    | NA    | NA           | NA    | NA     | NA           | NA    | NA    | NA           | NA    | NA    | NA           | NA    |
| Hockey Rink          | NA   | NA           | NA    | NA    | NA           | NA    | NA     | NA           | NA    | NA    | NA           | NA    | NA    | NA           | NA    |
| Korfball             | NA   | NA           | NA    | NA    | NA           | NA    | NA     | NA           | NA    | NA    | NA           | NA    | NA    | NA           | NA    |
| Modern Pentathlon    | NA   | NA           | NA    | NA    | NA           | NA    | NA     | NA           | NA    | NA    | NA           | NA    | NA    | NA           | NA    |
| Motorsport           | NA   | NA           | NA    | NA    | NA           | NA    | NA     | NA           | NA    | NA    | NA           | NA    | NA    | NA           | NA    |
| Other combat sports  | NA   | NA           | NA    | NA    | NA           | NA    | NA     | NA           | NA    | NA    | NA           | NA    | NA    | NA           | NA    |
| Rowing               | NA   | NA           | NA    | NA    | NA           | NA    | NA     | NA           | NA    | NA    | NA           | NA    | NA    | NA           | NA    |
| Rugby                | NA   | NA           | NA    | NA    | NA           | NA    | NA     | NA           | NA    | NA    | NA           | NA    | NA    | NA           | NA    |
| Sailing              | NA   | NA           | NA    | NA    | NA           | NA    | NA     | NA           | NA    | NA    | NA           | NA    | NA    | NA           | NA    |
| Soccer               | NA   | NA           | NA    | NA    | NA           | NA    | NA     | NA           | NA    | NA    | NA           | NA    | NA    | NA           | NA    |
| Surf                 | NA   | NA           | NA    | NA    | NA           | NA    | NA     | NA           | NA    | NA    | NA           | NA    | NA    | NA           | NA    |
| Swimming             | 8.17 | <b>10.29</b> | 12.35 | 10.26 | <b>12.13</b> | 14.06 | 12.02  | <b>13.61</b> | 15.40 | 13.16 | <b>15.26</b> | 18.04 | 15.00 | <b>17.99</b> | 22.66 |
| Tennis               | NA   | NA           | NA    | NA    | NA           | NA    | NA     | NA           | NA    | NA    | NA           | NA    | NA    | NA           | NA    |
| Triathlon            | 3.02 | <b>6.08</b>  | 10.09 | 5.18  | <b>8.51</b>  | 12.92 | 7.53   | <b>10.75</b> | 15.34 | 8.94  | <b>13.58</b> | 22.31 | 11.45 | <b>19.00</b> | 38.25 |
| Volleyball           | 6.30 | <b>10.05</b> | 14.34 | 9.58  | <b>13.39</b> | 17.86 | 12.82  | <b>16.33</b> | 20.82 | 14.94 | <b>19.93</b> | 27.84 | 18.61 | <b>26.54</b> | 42.32 |
| Wrestling and Judo   | 4.97 | <b>8.01</b>  | 11.50 | 7.53  | <b>10.60</b> | 14.24 | 10.05  | <b>12.89</b> | 16.53 | 11.66 | <b>15.66</b> | 22.05 | 14.45 | <b>20.73</b> | 33.39 |
| <b>Males</b>         |      |              |       |       |              |       |        |              |       |       |              |       |       |              |       |
| Archery and Shooting | NA   | NA           | NA    | NA    | NA           | NA    | NA     | NA           | NA    | NA    | NA           | NA    | NA    | NA           | NA    |
| Athletics            | 2.75 | <b>4.88</b>  | 7.43  | 4.31  | <b>6.49</b>  | 9.19  | 5.89   | <b>7.92</b>  | 10.65 | 6.83  | <b>9.67</b>  | 14.56 | 8.45  | <b>12.87</b> | 22.83 |
| Basketball           | 5.23 | <b>6.89</b>  | 8.67  | 7.65  | <b>9.34</b>  | 11.19 | 9.96   | <b>11.54</b> | 13.36 | 11.90 | <b>14.26</b> | 17.40 | 15.35 | <b>19.33</b> | 25.45 |
| Fencing              | NA   | NA           | NA    | NA    | NA           | NA    | NA     | NA           | NA    | NA    | NA           | NA    | NA    | NA           | NA    |
| Gymnastics           | NA   | NA           | NA    | NA    | NA           | NA    | NA     | NA           | NA    | NA    | NA           | NA    | NA    | NA           | NA    |
| Handball             | 4.89 | <b>7.05</b>  | 9.52  | 7.73  | <b>10.06</b> | 12.75 | 10.63  | <b>12.89</b> | 15.62 | 13.02 | <b>16.50</b> | 21.47 | 17.44 | <b>23.54</b> | 33.94 |
| Hockey Rink          | NA   | NA           | NA    | NA    | NA           | NA    | NA     | NA           | NA    | NA    | NA           | NA    | NA    | NA           | NA    |
| Korfball             | NA   | NA           | NA    | NA    | NA           | NA    | NA     | NA           | NA    | NA    | NA           | NA    | NA    | NA           | NA    |
| Modern Pentathlon    | NA   | NA           | NA    | NA    | NA           | NA    | NA     | NA           | NA    | NA    | NA           | NA    | NA    | NA           | NA    |
| Motorsport           | NA   | NA           | NA    | NA    | NA           | NA    | NA     | NA           | NA    | NA    | NA           | NA    | NA    | NA           | NA    |
| Other combat sports  | 2.91 | <b>5.24</b>  | 8.11  | 4.77  | <b>7.25</b>  | 10.35 | 6.72   | <b>9.08</b>  | 12.27 | 7.97  | <b>11.38</b> | 17.29 | 10.17 | <b>15.74</b> | 28.31 |
| Rowing               | NA   | NA           | NA    | NA    | NA           | NA    | NA     | NA           | NA    | NA    | NA           | NA    | NA    | NA           | NA    |
| Rugby                | 4.20 | <b>6.69</b>  | 9.79  | 7.75  | <b>10.80</b> | 14.56 | 11.86  | <b>15.08</b> | 19.18 | 15.62 | <b>21.05</b> | 29.36 | 23.22 | <b>34.01</b> | 54.17 |
| Sailing              | NA   | NA           | NA    | NA    | NA           | NA    | NA     | NA           | NA    | NA    | NA           | NA    | NA    | NA           | NA    |
| Soccer               | 3.81 | <b>5.35</b>  | 7.03  | 5.58  | <b>7.12</b>  | 8.85  | 7.27   | <b>8.68</b>  | 10.38 | 8.53  | <b>10.59</b> | 13.52 | 10.73 | <b>14.09</b> | 19.79 |
| Surf                 | NA   | NA           | NA    | NA    | NA           | NA    | NA     | NA           | NA    | NA    | NA           | NA    | NA    | NA           | NA    |
| Swimming             | 3.54 | <b>4.89</b>  | 6.37  | 5.31  | <b>6.71</b>  | 8.28  | 7.04   | <b>8.36</b>  | 9.93  | 8.45  | <b>10.42</b> | 13.16 | 10.97 | <b>14.31</b> | 19.76 |
| Tennis               | 3.15 | <b>6.49</b>  | 10.99 | 5.61  | <b>9.36</b>  | 14.42 | 8.37   | <b>12.07</b> | 17.41 | 10.10 | <b>15.56</b> | 25.98 | 13.25 | <b>22.44</b> | 46.20 |
| Triathlon            | 4.30 | <b>5.38</b>  | 6.49  | 5.68  | <b>6.69</b>  | 7.77  | 6.89   | <b>7.79</b>  | 8.81  | 7.82  | <b>9.07</b>  | 10.69 | 9.36  | <b>11.28</b> | 14.13 |
| Volleyball           | 5.39 | <b>8.16</b>  | 11.22 | 7.87  | <b>10.60</b> | 13.73 | 10.23  | <b>12.71</b> | 15.80 | 11.77 | <b>15.25</b> | 20.54 | 14.41 | <b>19.80</b> | 29.98 |
| Wrestling and Judo   | 3.90 | <b>5.10</b>  | 6.38  | 5.65  | <b>6.86</b>  | 8.18  | 7.32   | <b>8.43</b>  | 9.72  | 8.70  | <b>10.36</b> | 12.58 | 11.14 | <b>13.94</b> | 18.24 |

NA: data not presented for n &lt; 8.

Table 4 – Whole-body fat mass index (kg/m<sup>2</sup>) percentiles by sport and sex

| Sport                | 0.05 |          |      | 0.25 |          |      | Median |          |      | 0.75 |          |       | 0.95 |          |       |
|----------------------|------|----------|------|------|----------|------|--------|----------|------|------|----------|-------|------|----------|-------|
|                      | Low  | Estimate | High | Low  | Estimate | High | Low    | Estimate | High | Low  | Estimate | High  | Low  | Estimate | High  |
| <b>Females</b>       |      |          |      |      |          |      |        |          |      |      |          |       |      |          |       |
| Archery and Shooting | NA   | NA       | NA   | NA   | NA       | NA   | NA     | NA       | NA   | NA   | NA       | NA    | NA   | NA       | NA    |
| Athletics            | 1.07 | 1.53     | 1.99 | 1.49 | 1.90     | 2.33 | 1.87   | 2.21     | 2.61 | 2.09 | 2.56     | 3.28  | 2.45 | 3.18     | 4.56  |
| Basketball           | 1.50 | 1.90     | 2.31 | 2.16 | 2.54     | 2.94 | 2.79   | 3.12     | 3.49 | 3.30 | 3.82     | 4.50  | 4.22 | 5.12     | 6.50  |
| Fencing              | NA   | NA       | NA   | NA   | NA       | NA   | NA     | NA       | NA   | NA   | NA       | NA    | NA   | NA       | NA    |
| Gymnastics           | NA   | NA       | NA   | NA   | NA       | NA   | NA     | NA       | NA   | NA   | NA       | NA    | NA   | NA       | NA    |
| Handball             | 1.49 | 2.06     | 2.67 | 2.35 | 2.93     | 3.57 | 3.22   | 3.75     | 4.36 | 3.94 | 4.79     | 5.99  | 5.26 | 6.82     | 9.45  |
| Hockey Rink          | NA   | NA       | NA   | NA   | NA       | NA   | NA     | NA       | NA   | NA   | NA       | NA    | NA   | NA       | NA    |
| Korfball             | NA   | NA       | NA   | NA   | NA       | NA   | NA     | NA       | NA   | NA   | NA       | NA    | NA   | NA       | NA    |
| Modern Pentathlon    | NA   | NA       | NA   | NA   | NA       | NA   | NA     | NA       | NA   | NA   | NA       | NA    | NA   | NA       | NA    |
| Motorsport           | NA   | NA       | NA   | NA   | NA       | NA   | NA     | NA       | NA   | NA   | NA       | NA    | NA   | NA       | NA    |
| Other combat sports  | 1.05 | 1.65     | 2.28 | 1.62 | 2.20     | 2.84 | 2.19   | 2.69     | 3.30 | 2.55 | 3.29     | 4.47  | 3.17 | 4.40     | 6.90  |
| Rowing               | NA   | NA       | NA   | NA   | NA       | NA   | NA     | NA       | NA   | NA   | NA       | NA    | NA   | NA       | NA    |
| Rugby                | 1.31 | 2.00     | 2.80 | 2.42 | 3.22     | 4.14 | 3.70   | 4.49     | 5.44 | 4.86 | 6.25     | 8.32  | 7.19 | 10.07    | 15.34 |
| Sailing              | NA   | NA       | NA   | NA   | NA       | NA   | NA     | NA       | NA   | NA   | NA       | NA    | NA   | NA       | NA    |
| Soccer               | 1.36 | 1.77     | 2.18 | 1.90 | 2.28     | 2.67 | 2.40   | 2.71     | 3.07 | 2.76 | 3.23     | 3.87  | 3.37 | 4.15     | 5.41  |
| Surf                 | NA   | NA       | NA   | NA   | NA       | NA   | NA     | NA       | NA   | NA   | NA       | NA    | NA   | NA       | NA    |
| Swimming             | 1.21 | 1.59     | 1.97 | 1.77 | 2.13     | 2.51 | 2.31   | 2.62     | 2.96 | 2.73 | 3.21     | 3.86  | 3.48 | 4.31     | 5.66  |
| Tennis               | 1.02 | 1.90     | 2.96 | 1.80 | 2.75     | 3.89 | 2.67   | 3.55     | 4.71 | 3.23 | 4.58     | 6.98  | 4.25 | 6.63     | 12.31 |
| Triathlon            | 1.46 | 1.75     | 2.02 | 1.88 | 2.13     | 2.38 | 2.25   | 2.45     | 2.67 | 2.52 | 2.82     | 3.19  | 2.97 | 3.44     | 4.12  |
| Volleyball           | 1.39 | 2.01     | 2.66 | 2.05 | 2.64     | 3.28 | 2.69   | 3.20     | 3.80 | 3.11 | 3.86     | 4.98  | 3.84 | 5.07     | 7.36  |
| Wrestling and Judo   | 1.41 | 1.76     | 2.11 | 1.98 | 2.31     | 2.64 | 2.51   | 2.78     | 3.09 | 2.93 | 3.36     | 3.91  | 3.67 | 4.40     | 5.49  |
| <b>Males</b>         |      |          |      |      |          |      |        |          |      |      |          |       |      |          |       |
| Archery and Shooting | NA   | NA       | NA   | NA   | NA       | NA   | NA     | NA       | NA   | NA   | NA       | NA    | NA   | NA       | NA    |
| Athletics            | 0.72 | 1.69     | 3.08 | 1.71 | 2.99     | 4.74 | 3.12   | 4.46     | 6.38 | 4.20 | 6.65     | 11.66 | 6.45 | 11.80    | 27.71 |
| Basketball           | 1.90 | 2.84     | 3.90 | 3.25 | 4.27     | 5.43 | 4.72   | 5.68     | 6.83 | 5.94 | 7.54     | 9.92  | 8.27 | 11.35    | 16.97 |
| Fencing              | NA   | NA       | NA   | NA   | NA       | NA   | NA     | NA       | NA   | NA   | NA       | NA    | NA   | NA       | NA    |
| Gymnastics           | 0.64 | 1.89     | 3.93 | 1.73 | 3.49     | 6.14 | 3.42   | 5.35     | 8.39 | 4.67 | 8.21     | 16.62 | 7.30 | 15.17    | 44.49 |
| Handball             | NA   | NA       | NA   | NA   | NA       | NA   | NA     | NA       | NA   | NA   | NA       | NA    | NA   | NA       | NA    |
| Hockey Rink          | NA   | NA       | NA   | NA   | NA       | NA   | NA     | NA       | NA   | NA   | NA       | NA    | NA   | NA       | NA    |
| Korfball             | NA   | NA       | NA   | NA   | NA       | NA   | NA     | NA       | NA   | NA   | NA       | NA    | NA   | NA       | NA    |
| Modern Pentathlon    | NA   | NA       | NA   | NA   | NA       | NA   | NA     | NA       | NA   | NA   | NA       | NA    | NA   | NA       | NA    |
| Motorsport           | NA   | NA       | NA   | NA   | NA       | NA   | NA     | NA       | NA   | NA   | NA       | NA    | NA   | NA       | NA    |
| Other combat sports  | NA   | NA       | NA   | NA   | NA       | NA   | NA     | NA       | NA   | NA   | NA       | NA    | NA   | NA       | NA    |
| Rowing               | NA   | NA       | NA   | NA   | NA       | NA   | NA     | NA       | NA   | NA   | NA       | NA    | NA   | NA       | NA    |
| Rugby                | NA   | NA       | NA   | NA   | NA       | NA   | NA     | NA       | NA   | NA   | NA       | NA    | NA   | NA       | NA    |
| Sailing              | NA   | NA       | NA   | NA   | NA       | NA   | NA     | NA       | NA   | NA   | NA       | NA    | NA   | NA       | NA    |
| Soccer               | NA   | NA       | NA   | NA   | NA       | NA   | NA     | NA       | NA   | NA   | NA       | NA    | NA   | NA       | NA    |
| Surf                 | NA   | NA       | NA   | NA   | NA       | NA   | NA     | NA       | NA   | NA   | NA       | NA    | NA   | NA       | NA    |
| Swimming             | 1.41 | 2.50     | 3.84 | 2.69 | 3.97     | 5.50 | 4.23   | 5.46     | 7.05 | 5.43 | 7.53     | 11.08 | 7.77 | 11.94    | 21.24 |
| Tennis               | NA   | NA       | NA   | NA   | NA       | NA   | NA     | NA       | NA   | NA   | NA       | NA    | NA   | NA       | NA    |
| Triathlon            | 0.35 | 1.43     | 3.59 | 1.19 | 2.94     | 5.98 | 2.77   | 4.85     | 8.53 | 3.94 | 8.01     | 19.84 | 6.58 | 16.47    | 66.76 |
| Volleyball           | 1.21 | 2.61     | 4.53 | 2.62 | 4.38     | 6.68 | 4.48   | 6.26     | 8.75 | 5.87 | 8.96     | 14.95 | 8.66 | 15.00    | 32.33 |
| Wrestling and Judo   | 0.91 | 2.18     | 4.04 | 2.15 | 3.84     | 6.17 | 3.92   | 5.70     | 8.28 | 5.26 | 8.45     | 15.08 | 8.03 | 14.89    | 35.70 |

NA: data not presented for n &lt; 8.

Table 5 – Whole body fat mass (%) percentiles by sport and sex

| Sport                | 0.05  |          |       | 0.25  |          |       | Median |          |       | 0.75  |          |       | 0.95  |          |       |
|----------------------|-------|----------|-------|-------|----------|-------|--------|----------|-------|-------|----------|-------|-------|----------|-------|
|                      | Low   | Estimate | High  | Low   | Estimate | High  | Low    | Estimate | High  | Low   | Estimate | High  | Low   | Estimate | High  |
| <b>Females</b>       |       |          |       |       |          |       |        |          |       |       |          |       |       |          |       |
| Archery and Shooting | NA    | NA       | NA    | NA    | NA       | NA    | NA     | NA       | NA    | NA    | NA       | NA    | NA    | NA       | NA    |
| Athletics            | 7.23  | 12.49    | 16.31 | 12.38 | 15.95    | 18.94 | 15.95  | 18.36    | 20.76 | 17.78 | 20.76    | 24.34 | 20.40 | 24.23    | 29.48 |
| Basketball           | 13.59 | 17.96    | 21.44 | 19.38 | 22.40    | 25.06 | 23.41  | 25.49    | 27.58 | 25.93 | 28.58    | 31.60 | 29.55 | 33.03    | 37.40 |
| Fencing              | NA    | NA       | NA    | NA    | NA       | NA    | NA     | NA       | NA    | NA    | NA       | NA    | NA    | NA       | NA    |
| Gymnastics           | 7.57  | 15.35    | 20.80 | 14.44 | 19.70    | 24.00 | 19.22  | 22.72    | 26.23 | 21.45 | 25.75    | 31.01 | 24.65 | 30.10    | 37.88 |
| Handball             | NA    | NA       | NA    | NA    | NA       | NA    | NA     | NA       | NA    | NA    | NA       | NA    | NA    | NA       | NA    |
| Hockey Rink          | NA    | NA       | NA    | NA    | NA       | NA    | NA     | NA       | NA    | NA    | NA       | NA    | NA    | NA       | NA    |
| Korfball             | NA    | NA       | NA    | NA    | NA       | NA    | NA     | NA       | NA    | NA    | NA       | NA    | NA    | NA       | NA    |
| Modern Pentathlon    | NA    | NA       | NA    | NA    | NA       | NA    | NA     | NA       | NA    | NA    | NA       | NA    | NA    | NA       | NA    |
| Motorsport           | NA    | NA       | NA    | NA    | NA       | NA    | NA     | NA       | NA    | NA    | NA       | NA    | NA    | NA       | NA    |
| Other combat sports  | NA    | NA       | NA    | NA    | NA       | NA    | NA     | NA       | NA    | NA    | NA       | NA    | NA    | NA       | NA    |
| Rowing               | NA    | NA       | NA    | NA    | NA       | NA    | NA     | NA       | NA    | NA    | NA       | NA    | NA    | NA       | NA    |
| Rugby                | NA    | NA       | NA    | NA    | NA       | NA    | NA     | NA       | NA    | NA    | NA       | NA    | NA    | NA       | NA    |
| Sailing              | NA    | NA       | NA    | NA    | NA       | NA    | NA     | NA       | NA    | NA    | NA       | NA    | NA    | NA       | NA    |
| Soccer               | NA    | NA       | NA    | NA    | NA       | NA    | NA     | NA       | NA    | NA    | NA       | NA    | NA    | NA       | NA    |
| Surf                 | NA    | NA       | NA    | NA    | NA       | NA    | NA     | NA       | NA    | NA    | NA       | NA    | NA    | NA       | NA    |
| Swimming             | 15.25 | 18.73    | 21.40 | 19.00 | 21.42    | 23.50 | 21.60  | 23.29    | 24.97 | 23.07 | 25.15    | 27.58 | 25.18 | 27.84    | 31.33 |
| Tennis               | NA    | NA       | NA    | NA    | NA       | NA    | NA     | NA       | NA    | NA    | NA       | NA    | NA    | NA       | NA    |
| Triathlon            | 1.25  | 11.46    | 18.26 | 9.96  | 16.67    | 21.98 | 16.00  | 20.28    | 24.56 | 18.59 | 23.90    | 30.61 | 22.31 | 29.10    | 39.31 |
| Volleyball           | 11.61 | 18.17    | 22.95 | 17.99 | 22.47    | 26.21 | 22.43  | 25.46    | 28.48 | 24.70 | 28.44    | 32.92 | 27.96 | 32.74    | 39.30 |
| Wrestling and Judo   | 5.84  | 14.10    | 19.99 | 13.80 | 19.36    | 23.94 | 19.32  | 23.01    | 26.68 | 22.07 | 26.66    | 32.21 | 26.01 | 31.92    | 40.16 |
| <b>Males</b>         |       |          |       |       |          |       |        |          |       |       |          |       |       |          |       |
| Archery and Shooting | NA    | NA       | NA    | NA    | NA       | NA    | NA     | NA       | NA    | NA    | NA       | NA    | NA    | NA       | NA    |
| Athletics            | 1.17  | 6.46     | 9.96  | 5.75  | 9.20     | 11.92 | 8.93   | 11.11    | 13.29 | 10.30 | 13.02    | 16.47 | 12.26 | 15.77    | 21.05 |
| Basketball           | 5.42  | 8.53     | 11.04 | 10.09 | 12.22    | 14.09 | 13.33  | 14.78    | 16.21 | 15.45 | 17.34    | 19.45 | 18.51 | 21.02    | 24.12 |
| Fencing              | NA    | NA       | NA    | NA    | NA       | NA    | NA     | NA       | NA    | NA    | NA       | NA    | NA    | NA       | NA    |
| Gymnastics           | NA    | NA       | NA    | NA    | NA       | NA    | NA     | NA       | NA    | NA    | NA       | NA    | NA    | NA       | NA    |
| Handball             | 3.28  | 8.01     | 11.71 | 9.73  | 12.92    | 15.69 | 14.21  | 16.34    | 18.45 | 16.97 | 19.75    | 22.94 | 20.95 | 24.66    | 29.38 |
| Hockey Rink          | NA    | NA       | NA    | NA    | NA       | NA    | NA     | NA       | NA    | NA    | NA       | NA    | NA    | NA       | NA    |
| Korfball             | NA    | NA       | NA    | NA    | NA       | NA    | NA     | NA       | NA    | NA    | NA       | NA    | NA    | NA       | NA    |
| Modern Pentathlon    | NA    | NA       | NA    | NA    | NA       | NA    | NA     | NA       | NA    | NA    | NA       | NA    | NA    | NA       | NA    |
| Motorsport           | NA    | NA       | NA    | NA    | NA       | NA    | NA     | NA       | NA    | NA    | NA       | NA    | NA    | NA       | NA    |
| Other combat sports  | 2.09  | 7.81     | 11.75 | 7.28  | 11.08    | 14.15 | 10.90  | 13.36    | 15.82 | 12.56 | 15.63    | 19.43 | 14.96 | 18.90    | 24.62 |
| Rowing               | NA    | NA       | NA    | NA    | NA       | NA    | NA     | NA       | NA    | NA    | NA       | NA    | NA    | NA       | NA    |
| Rugby                | 1.93  | 7.75     | 12.35 | 10.19 | 14.10    | 17.51 | 15.92  | 18.51    | 21.10 | 19.52 | 22.92    | 26.84 | 24.68 | 29.26    | 35.10 |
| Sailing              | NA    | NA       | NA    | NA    | NA       | NA    | NA     | NA       | NA    | NA    | NA       | NA    | NA    | NA       | NA    |
| Soccer               | 4.34  | 7.51     | 9.93  | 8.19  | 10.34    | 12.18 | 10.87  | 12.31    | 13.75 | 12.43 | 14.28    | 16.43 | 14.68 | 17.11    | 20.28 |
| Surf                 | NA    | NA       | NA    | NA    | NA       | NA    | NA     | NA       | NA    | NA    | NA       | NA    | NA    | NA       | NA    |
| Swimming             | 3.65  | 6.92     | 9.49  | 8.09  | 10.31    | 12.23 | 11.17  | 12.66    | 14.14 | 13.08 | 15.02    | 17.23 | 15.83 | 18.41    | 21.67 |
| Tennis               | 0.00  | 9.16     | 15.19 | 7.96  | 13.92    | 18.58 | 13.51  | 17.22    | 20.94 | 15.87 | 20.53    | 26.48 | 19.26 | 25.29    | 34.46 |
| Triathlon            | 5.98  | 8.15     | 9.89  | 8.95  | 10.45    | 11.76 | 11.02  | 12.05    | 13.07 | 12.33 | 13.64    | 15.14 | 14.21 | 15.94    | 18.11 |
| Volleyball           | 4.05  | 8.99     | 12.54 | 8.98  | 12.29    | 15.03 | 12.41  | 14.59    | 16.77 | 14.14 | 16.88    | 20.19 | 16.64 | 20.18    | 25.12 |
| Wrestling and Judo   | 4.65  | 7.22     | 9.30  | 8.47  | 10.23    | 11.79 | 11.13  | 12.33    | 13.52 | 12.86 | 14.42    | 16.18 | 15.35 | 17.43    | 20.00 |

NA: data not presented for n &lt; 8.

Table 6 – Whole-body fat-free mass (kg) percentiles by sport and sex

| Sport                | 0.05  |          |       | 0.25  |          |       | Median |          |       | 0.75  |          |        | 0.95  |          |        |
|----------------------|-------|----------|-------|-------|----------|-------|--------|----------|-------|-------|----------|--------|-------|----------|--------|
|                      | Low   | Estimate | High  | Low   | Estimate | High  | Low    | Estimate | High  | Low   | Estimate | High   | Low   | Estimate | High   |
| <b>Females</b>       |       |          |       |       |          |       |        |          |       |       |          |        |       |          |        |
| Archery and Shooting | NA    | NA       | NA    | NA    | NA       | NA    | NA     | NA       | NA    | NA    | NA       | NA     | NA    | NA       | NA     |
| Athletics            | 37.93 | 40.59    | 43.26 | 43.16 | 45.81    | 48.47 | 46.79  | 49.44    | 52.09 | 50.41 | 53.07    | 55.73  | 55.63 | 58.29    | 60.96  |
| Basketball           | 37.57 | 39.36    | 41.19 | 42.80 | 44.58    | 46.40 | 46.43  | 48.21    | 50.03 | 50.05 | 51.84    | 53.66  | 55.27 | 57.06    | 58.89  |
| Fencing              | NA    | NA       | NA    | NA    | NA       | NA    | NA     | NA       | NA    | NA    | NA       | NA     | NA    | NA       | NA     |
| Gymnastics           | 26.48 | 29.58    | 32.63 | 31.71 | 34.80    | 37.84 | 35.35  | 38.43    | 41.47 | 38.97 | 42.06    | 45.10  | 44.18 | 47.28    | 50.33  |
| Handball             | NA    | NA       | NA    | NA    | NA       | NA    | NA     | NA       | NA    | NA    | NA       | NA     | NA    | NA       | NA     |
| Hockey Rink          | NA    | NA       | NA    | NA    | NA       | NA    | NA     | NA       | NA    | NA    | NA       | NA     | NA    | NA       | NA     |
| Korfball             | NA    | NA       | NA    | NA    | NA       | NA    | NA     | NA       | NA    | NA    | NA       | NA     | NA    | NA       | NA     |
| Modern Pentathlon    | NA    | NA       | NA    | NA    | NA       | NA    | NA     | NA       | NA    | NA    | NA       | NA     | NA    | NA       | NA     |
| Motorsport           | NA    | NA       | NA    | NA    | NA       | NA    | NA     | NA       | NA    | NA    | NA       | NA     | NA    | NA       | NA     |
| Other combat sports  | NA    | NA       | NA    | NA    | NA       | NA    | NA     | NA       | NA    | NA    | NA       | NA     | NA    | NA       | NA     |
| Rowing               | NA    | NA       | NA    | NA    | NA       | NA    | NA     | NA       | NA    | NA    | NA       | NA     | NA    | NA       | NA     |
| Rugby                | NA    | NA       | NA    | NA    | NA       | NA    | NA     | NA       | NA    | NA    | NA       | NA     | NA    | NA       | NA     |
| Sailing              | NA    | NA       | NA    | NA    | NA       | NA    | NA     | NA       | NA    | NA    | NA       | NA     | NA    | NA       | NA     |
| Soccer               | NA    | NA       | NA    | NA    | NA       | NA    | NA     | NA       | NA    | NA    | NA       | NA     | NA    | NA       | NA     |
| Surf                 | NA    | NA       | NA    | NA    | NA       | NA    | NA     | NA       | NA    | NA    | NA       | NA     | NA    | NA       | NA     |
| Swimming             | 33.84 | 36.11    | 38.39 | 39.06 | 41.33    | 43.60 | 42.70  | 44.96    | 47.22 | 46.32 | 48.59    | 50.86  | 51.54 | 53.81    | 56.09  |
| Tennis               | NA    | NA       | NA    | NA    | NA       | NA    | NA     | NA       | NA    | NA    | NA       | NA     | NA    | NA       | NA     |
| Triathlon            | 31.61 | 34.93    | 38.34 | 36.84 | 40.15    | 43.56 | 40.47  | 43.78    | 47.18 | 44.09 | 47.41    | 50.81  | 49.31 | 52.63    | 56.04  |
| Volleyball           | 37.28 | 39.91    | 42.60 | 42.51 | 45.13    | 47.82 | 46.14  | 48.76    | 51.44 | 49.77 | 52.39    | 55.07  | 54.98 | 57.61    | 60.30  |
| Wrestling and Judo   | 32.09 | 34.83    | 37.59 | 37.32 | 40.05    | 42.80 | 40.96  | 43.68    | 46.43 | 44.58 | 47.31    | 50.06  | 49.79 | 52.53    | 55.29  |
| <b>Males</b>         |       |          |       |       |          |       |        |          |       |       |          |        |       |          |        |
| Archery and Shooting | NA    | NA       | NA    | NA    | NA       | NA    | NA     | NA       | NA    | NA    | NA       | NA     | NA    | NA       | NA     |
| Athletics            | 0.00  | 21.95    | 45.58 | 19.87 | 42.02    | 60.61 | 40.89  | 55.97    | 71.06 | 51.34 | 69.92    | 92.07  | 66.37 | 89.99    | 122.31 |
| Basketball           | 29.25 | 41.25    | 51.15 | 47.74 | 56.09    | 63.58 | 60.58  | 66.40    | 72.22 | 69.22 | 76.71    | 85.06  | 81.65 | 91.55    | 103.55 |
| Fencing              | NA    | NA       | NA    | NA    | NA       | NA    | NA     | NA       | NA    | NA    | NA       | NA     | NA    | NA       | NA     |
| Gymnastics           | NA    | NA       | NA    | NA    | NA       | NA    | NA     | NA       | NA    | NA    | NA       | NA     | NA    | NA       | NA     |
| Handball             | 24.70 | 39.33    | 51.16 | 45.20 | 55.35    | 64.34 | 59.46  | 66.48    | 73.50 | 68.62 | 77.61    | 87.75  | 81.79 | 93.62    | 108.26 |
| Hockey Rink          | NA    | NA       | NA    | NA    | NA       | NA    | NA     | NA       | NA    | NA    | NA       | NA     | NA    | NA       | NA     |
| Korfball             | NA    | NA       | NA    | NA    | NA       | NA    | NA     | NA       | NA    | NA    | NA       | NA     | NA    | NA       | NA     |
| Modern Pentathlon    | NA    | NA       | NA    | NA    | NA       | NA    | NA     | NA       | NA    | NA    | NA       | NA     | NA    | NA       | NA     |
| Motorsport           | NA    | NA       | NA    | NA    | NA       | NA    | NA     | NA       | NA    | NA    | NA       | NA     | NA    | NA       | NA     |
| Other combat sports  | 0.00  | 21.12    | 42.12 | 20.75 | 40.15    | 56.55 | 40.20  | 53.37    | 66.58 | 50.23 | 66.59    | 86.03  | 64.66 | 85.62    | 114.02 |
| Rowing               | NA    | NA       | NA    | NA    | NA       | NA    | NA     | NA       | NA    | NA    | NA       | NA     | NA    | NA       | NA     |
| Rugby                | 24.99 | 39.50    | 51.28 | 45.99 | 56.04    | 64.97 | 60.59  | 67.54    | 74.49 | 70.10 | 79.03    | 89.08  | 83.79 | 95.57    | 110.08 |
| Sailing              | NA    | NA       | NA    | NA    | NA       | NA    | NA     | NA       | NA    | NA    | NA       | NA     | NA    | NA       | NA     |
| Soccer               | 17.15 | 33.39    | 46.22 | 37.84 | 49.06    | 58.88 | 52.23  | 59.95    | 67.68 | 61.02 | 70.85    | 82.07  | 73.68 | 86.52    | 102.76 |
| Surf                 | NA    | NA       | NA    | NA    | NA       | NA    | NA     | NA       | NA    | NA    | NA       | NA     | NA    | NA       | NA     |
| Swimming             | 20.09 | 33.51    | 44.38 | 38.95 | 48.23    | 56.49 | 52.06  | 58.47    | 64.91 | 60.48 | 68.70    | 78.02  | 72.59 | 83.43    | 96.88  |
| Tennis               | 0.00  | 18.51    | 41.74 | 16.48 | 38.29    | 56.54 | 37.25  | 52.04    | 66.82 | 47.54 | 65.79    | 87.59  | 62.34 | 85.57    | 117.48 |
| Triathlon            | 21.28 | 32.93    | 42.41 | 37.96 | 46.05    | 53.24 | 49.56  | 55.16    | 60.77 | 57.09 | 64.28    | 72.37  | 67.92 | 77.40    | 89.05  |
| Volleyball           | 8.45  | 35.70    | 56.37 | 37.59 | 56.37    | 72.42 | 57.85  | 70.74    | 83.58 | 69.01 | 85.11    | 103.84 | 85.06 | 105.78   | 132.99 |
| Wrestling and Judo   | 23.99 | 35.41    | 44.83 | 41.51 | 49.44    | 56.55 | 53.69  | 59.19    | 64.69 | 61.84 | 68.94    | 76.87  | 73.56 | 82.97    | 94.40  |

NA: data not presented for n &lt; 8.

Table 7 – Whole-body fat-free mass index (kg/m<sup>2</sup>) percentiles by sport and sex

| Sport                | 0.05  |          |       | 0.25  |          |       | Median |          |       | 0.75  |          |       | 0.95  |          |       |
|----------------------|-------|----------|-------|-------|----------|-------|--------|----------|-------|-------|----------|-------|-------|----------|-------|
|                      | Low   | Estimate | High  | Low   | Estimate | High  | Low    | Estimate | High  | Low   | Estimate | High  | Low   | Estimate | High  |
| <b>Females</b>       |       |          |       |       |          |       |        |          |       |       |          |       |       |          |       |
| Archery and Shooting | NA    | NA       | NA    | NA    | NA       | NA    | NA     | NA       | NA    | NA    | NA       | NA    | NA    | NA       | NA    |
| Athletics            | 13.27 | 14.81    | 16.31 | 14.88 | 16.23    | 17.61 | 16.11  | 17.30    | 18.57 | 16.99 | 18.43    | 20.11 | 18.34 | 20.20    | 22.55 |
| Basketball           | 12.55 | 13.56    | 14.51 | 13.93 | 14.77    | 15.62 | 14.97  | 15.68    | 16.44 | 15.75 | 16.65    | 17.66 | 16.96 | 18.14    | 19.59 |
| Fencing              | NA    | NA       | NA    | NA    | NA       | NA    | NA     | NA       | NA    | NA    | NA       | NA    | NA    | NA       | NA    |
| Gymnastics           | 11.48 | 12.82    | 14.14 | 12.73 | 13.92    | 15.14 | 13.68  | 14.74    | 15.87 | 14.34 | 15.60    | 17.06 | 15.35 | 16.93    | 18.92 |
| Handball             | NA    | NA       | NA    | NA    | NA       | NA    | NA     | NA       | NA    | NA    | NA       | NA    | NA    | NA       | NA    |
| Hockey Rink          | NA    | NA       | NA    | NA    | NA       | NA    | NA     | NA       | NA    | NA    | NA       | NA    | NA    | NA       | NA    |
| Korfball             | NA    | NA       | NA    | NA    | NA       | NA    | NA     | NA       | NA    | NA    | NA       | NA    | NA    | NA       | NA    |
| Modern Pentathlon    | NA    | NA       | NA    | NA    | NA       | NA    | NA     | NA       | NA    | NA    | NA       | NA    | NA    | NA       | NA    |
| Motorsport           | NA    | NA       | NA    | NA    | NA       | NA    | NA     | NA       | NA    | NA    | NA       | NA    | NA    | NA       | NA    |
| Other combat sports  | NA    | NA       | NA    | NA    | NA       | NA    | NA     | NA       | NA    | NA    | NA       | NA    | NA    | NA       | NA    |
| Rowing               | NA    | NA       | NA    | NA    | NA       | NA    | NA     | NA       | NA    | NA    | NA       | NA    | NA    | NA       | NA    |
| Rugby                | NA    | NA       | NA    | NA    | NA       | NA    | NA     | NA       | NA    | NA    | NA       | NA    | NA    | NA       | NA    |
| Sailing              | NA    | NA       | NA    | NA    | NA       | NA    | NA     | NA       | NA    | NA    | NA       | NA    | NA    | NA       | NA    |
| Soccer               | NA    | NA       | NA    | NA    | NA       | NA    | NA     | NA       | NA    | NA    | NA       | NA    | NA    | NA       | NA    |
| Surf                 | NA    | NA       | NA    | NA    | NA       | NA    | NA     | NA       | NA    | NA    | NA       | NA    | NA    | NA       | NA    |
| Swimming             | 12.84 | 14.00    | 15.10 | 14.18 | 15.18    | 16.17 | 15.20  | 16.05    | 16.95 | 15.93 | 16.97    | 18.16 | 17.05 | 18.40    | 20.06 |
| Tennis               | NA    | NA       | NA    | NA    | NA       | NA    | NA     | NA       | NA    | NA    | NA       | NA    | NA    | NA       | NA    |
| Triathlon            | 11.92 | 13.51    | 15.08 | 13.30 | 14.73    | 16.20 | 14.36  | 15.64    | 17.03 | 15.10 | 16.61    | 18.38 | 16.22 | 18.11    | 20.52 |
| Volleyball           | 12.38 | 13.74    | 15.05 | 13.79 | 14.98    | 16.18 | 14.87  | 15.91    | 17.02 | 15.64 | 16.90    | 18.35 | 16.82 | 18.43    | 20.45 |
| Wrestling and Judo   | 12.11 | 13.71    | 15.29 | 13.74 | 15.16    | 16.63 | 15.00  | 16.26    | 17.63 | 15.91 | 17.45    | 19.25 | 17.30 | 19.30    | 21.85 |
| <b>Males</b>         |       |          |       |       |          |       |        |          |       |       |          |       |       |          |       |
| Archery and Shooting | NA    | NA       | NA    | NA    | NA       | NA    | NA     | NA       | NA    | NA    | NA       | NA    | NA    | NA       | NA    |
| Athletics            | 14.45 | 16.83    | 19.05 | 16.41 | 18.43    | 20.45 | 17.93  | 19.62    | 21.48 | 18.84 | 20.90    | 23.47 | 20.22 | 22.88    | 26.66 |
| Basketball           | 15.26 | 16.39    | 17.42 | 16.87 | 17.79    | 18.68 | 18.10  | 18.84    | 19.61 | 19.00 | 19.94    | 21.03 | 20.37 | 21.65    | 23.26 |
| Fencing              | NA    | NA       | NA    | NA    | NA       | NA    | NA     | NA       | NA    | NA    | NA       | NA    | NA    | NA       | NA    |
| Gymnastics           | NA    | NA       | NA    | NA    | NA       | NA    | NA     | NA       | NA    | NA    | NA       | NA    | NA    | NA       | NA    |
| Handball             | 16.59 | 17.97    | 19.23 | 18.36 | 19.49    | 20.58 | 19.70  | 20.61    | 21.57 | 20.65 | 21.80    | 23.14 | 22.09 | 23.64    | 25.61 |
| Hockey Rink          | NA    | NA       | NA    | NA    | NA       | NA    | NA     | NA       | NA    | NA    | NA       | NA    | NA    | NA       | NA    |
| Korfball             | NA    | NA       | NA    | NA    | NA       | NA    | NA     | NA       | NA    | NA    | NA       | NA    | NA    | NA       | NA    |
| Modern Pentathlon    | NA    | NA       | NA    | NA    | NA       | NA    | NA     | NA       | NA    | NA    | NA       | NA    | NA    | NA       | NA    |
| Motorsport           | NA    | NA       | NA    | NA    | NA       | NA    | NA     | NA       | NA    | NA    | NA       | NA    | NA    | NA       | NA    |
| Other combat sports  | 14.09 | 16.38    | 18.51 | 16.11 | 18.04    | 19.98 | 17.68  | 19.30    | 21.07 | 18.64 | 20.64    | 23.13 | 20.12 | 22.74    | 26.44 |
| Rowing               | NA    | NA       | NA    | NA    | NA       | NA    | NA     | NA       | NA    | NA    | NA       | NA    | NA    | NA       | NA    |
| Rugby                | 15.69 | 17.47    | 19.14 | 18.10 | 19.60    | 21.08 | 19.99  | 21.23    | 22.54 | 21.37 | 22.99    | 24.89 | 23.54 | 25.79    | 28.71 |
| Sailing              | NA    | NA       | NA    | NA    | NA       | NA    | NA     | NA       | NA    | NA    | NA       | NA    | NA    | NA       | NA    |
| Soccer               | 16.35 | 17.88    | 19.28 | 18.12 | 19.38    | 20.60 | 19.46  | 20.49    | 21.57 | 20.38 | 21.66    | 23.16 | 21.77 | 23.47    | 25.67 |
| Surf                 | NA    | NA       | NA    | NA    | NA       | NA    | NA     | NA       | NA    | NA    | NA       | NA    | NA    | NA       | NA    |
| Swimming             | 15.24 | 16.54    | 17.73 | 16.91 | 17.97    | 19.00 | 18.18  | 19.04    | 19.94 | 19.08 | 20.18    | 21.44 | 20.46 | 21.92    | 23.79 |
| Tennis               | 13.91 | 16.37    | 18.68 | 15.96 | 18.05    | 20.16 | 17.56  | 19.32    | 21.26 | 18.51 | 20.68    | 23.39 | 19.98 | 22.80    | 26.84 |
| Triathlon            | 15.33 | 16.45    | 17.47 | 16.80 | 17.70    | 18.58 | 17.90  | 18.63    | 19.39 | 18.68 | 19.60    | 20.66 | 19.87 | 21.09    | 22.64 |
| Volleyball           | 15.85 | 17.75    | 19.46 | 17.67 | 19.23    | 20.76 | 19.05  | 20.34    | 21.71 | 19.92 | 21.51    | 23.41 | 21.25 | 23.31    | 26.09 |
| Wrestling and Judo   | 15.74 | 17.26    | 18.66 | 17.90 | 19.16    | 20.39 | 19.57  | 20.60    | 21.69 | 20.81 | 22.16    | 23.71 | 22.74 | 24.60    | 26.96 |

NA: data not presented for n &lt; 8.



Table 8 – Whole-body lean soft tissue (kg) percentiles by sport and sex

| Sport                | 0.05  |          |       | 0.25  |          |       | Median |          |       | 0.75  |          |       | 0.95  |          |       |
|----------------------|-------|----------|-------|-------|----------|-------|--------|----------|-------|-------|----------|-------|-------|----------|-------|
|                      | Low   | Estimate | High  | Low   | Estimate | High  | Low    | Estimate | High  | Low   | Estimate | High  | Low   | Estimate | High  |
| <b>Females</b>       |       |          |       |       |          |       |        |          |       |       |          |       |       |          |       |
| Archery and Shooting | NA    | NA       | NA    | NA    | NA       | NA    | NA     | NA       | NA    | NA    | NA       | NA    | NA    | NA       | NA    |
| Athletics            | 35.72 | 38.31    | 40.90 | 40.71 | 43.27    | 45.83 | 44.19  | 46.73    | 49.26 | 47.62 | 50.18    | 52.74 | 52.55 | 55.14    | 57.73 |
| Basketball           | 35.29 | 37.08    | 38.88 | 40.29 | 42.05    | 43.81 | 43.76  | 45.50    | 47.24 | 47.19 | 48.95    | 50.72 | 52.12 | 53.92    | 55.71 |
| Fencing              | NA    | NA       | NA    | NA    | NA       | NA    | NA     | NA       | NA    | NA    | NA       | NA    | NA    | NA       | NA    |
| Gymnastics           | 24.67 | 27.64    | 30.64 | 29.67 | 32.61    | 35.58 | 33.14  | 36.06    | 39.01 | 36.57 | 39.51    | 42.48 | 41.51 | 44.48    | 47.48 |
| Handball             | NA    | NA       | NA    | NA    | NA       | NA    | NA     | NA       | NA    | NA    | NA       | NA    | NA    | NA       | NA    |
| Hockey Rink          | NA    | NA       | NA    | NA    | NA       | NA    | NA     | NA       | NA    | NA    | NA       | NA    | NA    | NA       | NA    |
| Korfball             | NA    | NA       | NA    | NA    | NA       | NA    | NA     | NA       | NA    | NA    | NA       | NA    | NA    | NA       | NA    |
| Modern Pentathlon    | NA    | NA       | NA    | NA    | NA       | NA    | NA     | NA       | NA    | NA    | NA       | NA    | NA    | NA       | NA    |
| Motorsport           | NA    | NA       | NA    | NA    | NA       | NA    | NA     | NA       | NA    | NA    | NA       | NA    | NA    | NA       | NA    |
| Other combat sports  | NA    | NA       | NA    | NA    | NA       | NA    | NA     | NA       | NA    | NA    | NA       | NA    | NA    | NA       | NA    |
| Rowing               | NA    | NA       | NA    | NA    | NA       | NA    | NA     | NA       | NA    | NA    | NA       | NA    | NA    | NA       | NA    |
| Rugby                | NA    | NA       | NA    | NA    | NA       | NA    | NA     | NA       | NA    | NA    | NA       | NA    | NA    | NA       | NA    |
| Sailing              | NA    | NA       | NA    | NA    | NA       | NA    | NA     | NA       | NA    | NA    | NA       | NA    | NA    | NA       | NA    |
| Soccer               | NA    | NA       | NA    | NA    | NA       | NA    | NA     | NA       | NA    | NA    | NA       | NA    | NA    | NA       | NA    |
| Surf                 | NA    | NA       | NA    | NA    | NA       | NA    | NA     | NA       | NA    | NA    | NA       | NA    | NA    | NA       | NA    |
| Swimming             | 32.03 | 34.26    | 36.49 | 37.03 | 39.22    | 41.42 | 40.50  | 42.68    | 44.85 | 43.93 | 46.13    | 48.32 | 48.87 | 51.09    | 53.32 |
| Tennis               | NA    | NA       | NA    | NA    | NA       | NA    | NA     | NA       | NA    | NA    | NA       | NA    | NA    | NA       | NA    |
| Triathlon            | 29.83 | 32.84    | 36.37 | 34.83 | 37.81    | 41.31 | 38.30  | 41.26    | 44.74 | 41.73 | 44.71    | 48.21 | 46.67 | 49.68    | 53.21 |
| Volleyball           | 35.03 | 37.65    | 40.23 | 40.03 | 42.61    | 45.17 | 43.50  | 46.06    | 48.60 | 46.93 | 49.52    | 52.07 | 51.87 | 54.48    | 57.07 |
| Wrestling and Judo   | 29.96 | 32.65    | 35.32 | 34.96 | 37.62    | 40.25 | 38.43  | 41.07    | 43.68 | 41.86 | 44.52    | 47.16 | 46.80 | 49.49    | 52.16 |
| <b>Males</b>         |       |          |       |       |          |       |        |          |       |       |          |       |       |          |       |
| Archery and Shooting | NA    | NA       | NA    | NA    | NA       | NA    | NA     | NA       | NA    | NA    | NA       | NA    | NA    | NA       | NA    |
| Athletics            | 42.32 | 51.34    | 58.23 | 50.12 | 56.63    | 62.26 | 55.54  | 60.30    | 65.06 | 58.35 | 63.98    | 70.48 | 62.38 | 69.26    | 78.28 |
| Basketball           | 46.56 | 52.63    | 57.69 | 55.60 | 59.92    | 63.82 | 61.89  | 64.98    | 68.08 | 66.14 | 70.05    | 74.36 | 72.27 | 77.33    | 83.40 |
| Fencing              | NA    | NA       | NA    | NA    | NA       | NA    | NA     | NA       | NA    | NA    | NA       | NA    | NA    | NA       | NA    |
| Gymnastics           | NA    | NA       | NA    | NA    | NA       | NA    | NA     | NA       | NA    | NA    | NA       | NA    | NA    | NA       | NA    |
| Handball             | 46.37 | 53.24    | 58.88 | 55.60 | 60.50    | 64.88 | 62.03  | 65.54    | 69.06 | 66.20 | 70.58    | 75.48 | 72.20 | 77.84    | 84.71 |
| Hockey Rink          | NA    | NA       | NA    | NA    | NA       | NA    | NA     | NA       | NA    | NA    | NA       | NA    | NA    | NA       | NA    |
| Korfball             | NA    | NA       | NA    | NA    | NA       | NA    | NA     | NA       | NA    | NA    | NA       | NA    | NA    | NA       | NA    |
| Modern Pentathlon    | NA    | NA       | NA    | NA    | NA       | NA    | NA     | NA       | NA    | NA    | NA       | NA    | NA    | NA       | NA    |
| Motorsport           | NA    | NA       | NA    | NA    | NA       | NA    | NA     | NA       | NA    | NA    | NA       | NA    | NA    | NA       | NA    |
| Other combat sports  | 36.02 | 45.98    | 53.61 | 45.27 | 52.39    | 58.54 | 51.70  | 56.84    | 61.97 | 55.13 | 61.29    | 68.40 | 60.06 | 67.69    | 77.65 |
| Rowing               | NA    | NA       | NA    | NA    | NA       | NA    | NA     | NA       | NA    | NA    | NA       | NA    | NA    | NA       | NA    |
| Rugby                | 43.33 | 51.34    | 57.93 | 54.54 | 60.22    | 65.31 | 62.34  | 66.39    | 70.44 | 67.47 | 72.56    | 78.23 | 74.85 | 81.44    | 89.45 |
| Sailing              | NA    | NA       | NA    | NA    | NA       | NA    | NA     | NA       | NA    | NA    | NA       | NA    | NA    | NA       | NA    |
| Soccer               | 44.82 | 50.75    | 55.53 | 51.98 | 56.21    | 59.98 | 56.95  | 60.01    | 63.07 | 60.04 | 63.80    | 68.04 | 64.48 | 69.27    | 75.19 |
| Surf                 | NA    | NA       | NA    | NA    | NA       | NA    | NA     | NA       | NA    | NA    | NA       | NA    | NA    | NA       | NA    |
| Swimming             | 40.76 | 47.03    | 52.17 | 49.19 | 53.64    | 57.64 | 55.04  | 58.24    | 61.44 | 58.85 | 62.84    | 67.30 | 64.32 | 69.46    | 75.72 |
| Tennis               | 33.38 | 45.01    | 53.83 | 43.65 | 51.96    | 59.11 | 50.79  | 56.78    | 62.78 | 54.46 | 61.61    | 69.92 | 59.74 | 68.55    | 80.18 |
| Triathlon            | 43.39 | 47.50    | 50.90 | 48.96 | 51.91    | 54.56 | 52.82  | 54.97    | 57.11 | 55.37 | 58.03    | 60.98 | 59.03 | 62.43    | 66.54 |
| Volleyball           | 50.12 | 59.89    | 67.52 | 59.98 | 66.97    | 73.08 | 66.84  | 71.89    | 76.94 | 70.70 | 76.81    | 83.80 | 76.26 | 83.89    | 93.66 |
| Wrestling and Judo   | 40.13 | 46.08    | 51.04 | 48.92 | 53.16    | 56.98 | 55.04  | 58.07    | 61.11 | 59.16 | 62.99    | 67.22 | 65.10 | 70.06    | 76.02 |

NA: data not presented for n &lt; 8.

Table 9 – Subtotal\* bone mineral content (g) percentiles by sport and sex

| Sport                | 0.05 |          |      | 0.25 |          |      | Median |          |      | 0.75 |          |      | 0.95 |          |      |
|----------------------|------|----------|------|------|----------|------|--------|----------|------|------|----------|------|------|----------|------|
|                      | Low  | Estimate | High | Low  | Estimate | High | Low    | Estimate | High | Low  | Estimate | High | Low  | Estimate | High |
| <b>Females</b>       |      |          |      |      |          |      |        |          |      |      |          |      |      |          |      |
| Archery and Shooting | NA   | NA       | NA   | NA   | NA       | NA   | NA     | NA       | NA   | NA   | NA       | NA   | NA   | NA       | NA   |
| Athletics            | 1324 | 1844     | 2258 | 1810 | 2191     | 2529 | 2148   | 2432     | 2718 | 2336 | 2673     | 3056 | 2608 | 3020     | 3542 |
| Basketball           | 1655 | 2003     | 2297 | 2195 | 2443     | 2669 | 2571   | 2749     | 2928 | 2829 | 3055     | 3303 | 3202 | 3495     | 3843 |
| Fencing              | NA   | NA       | NA   | NA   | NA       | NA   | NA     | NA       | NA   | NA   | NA       | NA   | NA   | NA       | NA   |
| Gymnastics           | NA   | NA       | NA   | NA   | NA       | NA   | NA     | NA       | NA   | NA   | NA       | NA   | NA   | NA       | NA   |
| Handball             | 1723 | 2075     | 2367 | 2218 | 2469     | 2696 | 2561   | 2743     | 2925 | 2790 | 3017     | 3269 | 3119 | 3412     | 3763 |
| Hockey Rink          | NA   | NA       | NA   | NA   | NA       | NA   | NA     | NA       | NA   | NA   | NA       | NA   | NA   | NA       | NA   |
| Korfball             | NA   | NA       | NA   | NA   | NA       | NA   | NA     | NA       | NA   | NA   | NA       | NA   | NA   | NA       | NA   |
| Modern Pentathlon    | NA   | NA       | NA   | NA   | NA       | NA   | NA     | NA       | NA   | NA   | NA       | NA   | NA   | NA       | NA   |
| Motorsport           | NA   | NA       | NA   | NA   | NA       | NA   | NA     | NA       | NA   | NA   | NA       | NA   | NA   | NA       | NA   |
| Other combat sports  | 1145 | 1646     | 2043 | 1640 | 2004     | 2325 | 1984   | 2253     | 2521 | 2180 | 2503     | 2866 | 2463 | 2861     | 3361 |
| Rowing               | NA   | NA       | NA   | NA   | NA       | NA   | NA     | NA       | NA   | NA   | NA       | NA   | NA   | NA       | NA   |
| Rugby                | 1831 | 2143     | 2405 | 2281 | 2506     | 2709 | 2595   | 2757     | 2920 | 2806 | 3009     | 3233 | 3110 | 3371     | 3684 |
| Sailing              | NA   | NA       | NA   | NA   | NA       | NA   | NA     | NA       | NA   | NA   | NA       | NA   | NA   | NA       | NA   |
| Soccer               | 1604 | 1913     | 2167 | 1996 | 2218     | 2419 | 2268   | 2431     | 2593 | 2443 | 2643     | 2866 | 2694 | 2948     | 3257 |
| Surf                 | NA   | NA       | NA   | NA   | NA       | NA   | NA     | NA       | NA   | NA   | NA       | NA   | NA   | NA       | NA   |
| Swimming             | 1106 | 1434     | 1706 | 1572 | 1805     | 2015 | 1896   | 2063     | 2229 | 2110 | 2320     | 2553 | 2420 | 2691     | 3020 |
| Tennis               | 1050 | 1534     | 1917 | 1504 | 1858     | 2170 | 1820   | 2083     | 2346 | 1996 | 2309     | 2663 | 2250 | 2633     | 3117 |
| Triathlon            | 1232 | 1457     | 1645 | 1554 | 1715     | 1861 | 1778   | 1895     | 2011 | 1928 | 2074     | 2235 | 2144 | 2332     | 2557 |
| Volleyball           | 1911 | 2432     | 2851 | 2468 | 2846     | 3182 | 2855   | 3133     | 3412 | 3085 | 3421     | 3799 | 3416 | 3835     | 4355 |
| Wrestling and Judo   | 1551 | 1830     | 2066 | 1978 | 2178     | 2360 | 2276   | 2420     | 2564 | 2480 | 2662     | 2862 | 2774 | 3010     | 3290 |
| <b>Males</b>         |      |          |      |      |          |      |        |          |      |      |          |      |      |          |      |
| Archery and Shooting | NA   | NA       | NA   | NA   | NA       | NA   | NA     | NA       | NA   | NA   | NA       | NA   | NA   | NA       | NA   |
| Athletics            | 873  | 1344     | 1706 | 1355 | 1685     | 1972 | 1690   | 1923     | 2157 | 1875 | 2161     | 2492 | 2142 | 2502     | 2974 |
| Basketball           | 905  | 1314     | 1645 | 1469 | 1753     | 2006 | 1861   | 2059     | 2257 | 2112 | 2364     | 2649 | 2473 | 2803     | 3213 |
| Fencing              | NA   | NA       | NA   | NA   | NA       | NA   | NA     | NA       | NA   | NA   | NA       | NA   | NA   | NA       | NA   |
| Gymnastics           | 584  | 1036     | 1376 | 1005 | 1324     | 1595 | 1299   | 1523     | 1747 | 1451 | 1723     | 2040 | 1670 | 2011     | 2462 |
| Handball             | NA   | NA       | NA   | NA   | NA       | NA   | NA     | NA       | NA   | NA   | NA       | NA   | NA   | NA       | NA   |
| Hockey Rink          | NA   | NA       | NA   | NA   | NA       | NA   | NA     | NA       | NA   | NA   | NA       | NA   | NA   | NA       | NA   |
| Korfball             | NA   | NA       | NA   | NA   | NA       | NA   | NA     | NA       | NA   | NA   | NA       | NA   | NA   | NA       | NA   |
| Modern Pentathlon    | NA   | NA       | NA   | NA   | NA       | NA   | NA     | NA       | NA   | NA   | NA       | NA   | NA   | NA       | NA   |
| Motorsport           | NA   | NA       | NA   | NA   | NA       | NA   | NA     | NA       | NA   | NA   | NA       | NA   | NA   | NA       | NA   |
| Other combat sports  | NA   | NA       | NA   | NA   | NA       | NA   | NA     | NA       | NA   | NA   | NA       | NA   | NA   | NA       | NA   |
| Rowing               | NA   | NA       | NA   | NA   | NA       | NA   | NA     | NA       | NA   | NA   | NA       | NA   | NA   | NA       | NA   |
| Rugby                | NA   | NA       | NA   | NA   | NA       | NA   | NA     | NA       | NA   | NA   | NA       | NA   | NA   | NA       | NA   |
| Sailing              | NA   | NA       | NA   | NA   | NA       | NA   | NA     | NA       | NA   | NA   | NA       | NA   | NA   | NA       | NA   |
| Soccer               | NA   | NA       | NA   | NA   | NA       | NA   | NA     | NA       | NA   | NA   | NA       | NA   | NA   | NA       | NA   |
| Surf                 | NA   | NA       | NA   | NA   | NA       | NA   | NA     | NA       | NA   | NA   | NA       | NA   | NA   | NA       | NA   |
| Swimming             | 853  | 1146.1   | 1377 | 1187 | 1394     | 1575 | 1419   | 1566     | 1712 | 1556 | 1738     | 1944 | 1754 | 1985     | 2279 |
| Tennis               | NA   | NA       | NA   | NA   | NA       | NA   | NA     | NA       | NA   | NA   | NA       | NA   | NA   | NA       | NA   |
| Triathlon            | 629  | 1018     | 1310 | 969  | 1245     | 1482 | 1206   | 1403     | 1601 | 1325 | 1561     | 1838 | 1496 | 1788     | 2178 |
| Volleyball           | 928  | 1373     | 1716 | 1383 | 1696     | 1968 | 1699   | 1921     | 2143 | 1874 | 2145     | 2459 | 2125 | 2468     | 2914 |
| Wrestling and Judo   | 796  | 1255     | 1605 | 1255 | 1578     | 1856 | 1575   | 1802     | 2030 | 1749 | 2027     | 2349 | 1999 | 2349     | 2808 |

NA: data not presented for n &lt; 8.

\*Whole-body minus the head

Table 10 – Subtotal\* fat mass (kg) percentiles by sport and sex

| Sport                | 0.05 |          |       | 0.25  |          |       | Median |          |       | 0.75  |          |       | 0.95  |          |       |
|----------------------|------|----------|-------|-------|----------|-------|--------|----------|-------|-------|----------|-------|-------|----------|-------|
|                      | Low  | Estimate | High  | Low   | Estimate | High  | Low    | Estimate | High  | Low   | Estimate | High  | Low   | Estimate | High  |
| <b>Females</b>       |      |          |       |       |          |       |        |          |       |       |          |       |       |          |       |
| Archery and Shooting | NA   | NA       | NA    | NA    | NA       | NA    | NA     | NA       | NA    | NA    | NA       | NA    | NA    | NA       | NA    |
| Athletics            | 3.84 | 6.30     | 9.17  | 5.98  | 8.52     | 11.56 | 8.14   | 10.51    | 13.58 | 9.56  | 12.97    | 18.48 | 12.04 | 17.54    | 28.80 |
| Basketball           | 7.71 | 10.23    | 12.89 | 10.83 | 13.30    | 15.99 | 13.72  | 15.96    | 18.58 | 15.93 | 19.16    | 23.53 | 19.76 | 24.91    | 33.05 |
| Fencing              | NA   | NA       | NA    | NA    | NA       | NA    | NA     | NA       | NA    | NA    | NA       | NA    | NA    | NA       | NA    |
| Gymnastics           | 3.29 | 6.35     | 10.27 | 5.62  | 8.95     | 13.26 | 8.14   | 11.35    | 15.84 | 9.72  | 14.41    | 22.96 | 12.56 | 20.31    | 39.17 |
| Handball             | NA   | NA       | NA    | NA    | NA       | NA    | NA     | NA       | NA    | NA    | NA       | NA    | NA    | NA       | NA    |
| Hockey Rink          | NA   | NA       | NA    | NA    | NA       | NA    | NA     | NA       | NA    | NA    | NA       | NA    | NA    | NA       | NA    |
| Korfball             | NA   | NA       | NA    | NA    | NA       | NA    | NA     | NA       | NA    | NA    | NA       | NA    | NA    | NA       | NA    |
| Modern Pentathlon    | NA   | NA       | NA    | NA    | NA       | NA    | NA     | NA       | NA    | NA    | NA       | NA    | NA    | NA       | NA    |
| Motorsport           | NA   | NA       | NA    | NA    | NA       | NA    | NA     | NA       | NA    | NA    | NA       | NA    | NA    | NA       | NA    |
| Other combat sports  | NA   | NA       | NA    | NA    | NA       | NA    | NA     | NA       | NA    | NA    | NA       | NA    | NA    | NA       | NA    |
| Rowing               | NA   | NA       | NA    | NA    | NA       | NA    | NA     | NA       | NA    | NA    | NA       | NA    | NA    | NA       | NA    |
| Rugby                | NA   | NA       | NA    | NA    | NA       | NA    | NA     | NA       | NA    | NA    | NA       | NA    | NA    | NA       | NA    |
| Sailing              | NA   | NA       | NA    | NA    | NA       | NA    | NA     | NA       | NA    | NA    | NA       | NA    | NA    | NA       | NA    |
| Soccer               | NA   | NA       | NA    | NA    | NA       | NA    | NA     | NA       | NA    | NA    | NA       | NA    | NA    | NA       | NA    |
| Surf                 | NA   | NA       | NA    | NA    | NA       | NA    | NA     | NA       | NA    | NA    | NA       | NA    | NA    | NA       | NA    |
| Swimming             | 6.77 | 9.17     | 11.63 | 9.14  | 11.37    | 13.79 | 11.25  | 13.22    | 15.53 | 12.66 | 15.36    | 19.12 | 15.01 | 19.06    | 25.79 |
| Tennis               | NA   | NA       | NA    | NA    | NA       | NA    | NA     | NA       | NA    | NA    | NA       | NA    | NA    | NA       | NA    |
| Triathlon            | 1.97 | 4.99     | 9.68  | 4.05  | 7.79     | 13.40 | 6.70   | 10.61    | 16.81 | 8.40  | 14.46    | 27.78 | 11.63 | 22.57    | 57.24 |
| Volleyball           | 5.76 | 9.58     | 14.08 | 9.10  | 13.08    | 17.87 | 12.50  | 16.23    | 21.09 | 14.75 | 20.15    | 28.97 | 18.71 | 27.51    | 45.75 |
| Wrestling and Judo   | 4.00 | 7.11     | 10.95 | 6.65  | 10.02    | 14.21 | 9.49   | 12.71    | 17.04 | 11.37 | 16.13    | 24.29 | 14.76 | 22.73    | 40.44 |
| <b>Males</b>         |      |          |       |       |          |       |        |          |       |       |          |       |       |          |       |
| Archery and Shooting | NA   | NA       | NA    | NA    | NA       | NA    | NA     | NA       | NA    | NA    | NA       | NA    | NA    | NA       | NA    |
| Athletics            | 2.64 | 4.27     | 6.17  | 3.89  | 5.53     | 7.50  | 5.10   | 6.62     | 8.59  | 5.84  | 7.92     | 11.25 | 7.10  | 10.25    | 16.58 |
| Basketball           | 4.54 | 6.02     | 7.64  | 6.77  | 8.31     | 10.01 | 8.93   | 10.38    | 12.08 | 10.77 | 12.98    | 15.93 | 14.11 | 17.90    | 23.74 |
| Fencing              | NA   | NA       | NA    | NA    | NA       | NA    | NA     | NA       | NA    | NA    | NA       | NA    | NA    | NA       | NA    |
| Gymnastics           | NA   | NA       | NA    | NA    | NA       | NA    | NA     | NA       | NA    | NA    | NA       | NA    | NA    | NA       | NA    |
| Handball             | 4.22 | 6.15     | 8.41  | 6.81  | 8.96     | 11.48 | 9.50   | 11.63    | 14.25 | 11.79 | 15.10    | 19.88 | 16.08 | 21.99    | 32.10 |
| Hockey Rink          | NA   | NA       | NA    | NA    | NA       | NA    | NA     | NA       | NA    | NA    | NA       | NA    | NA    | NA       | NA    |
| Korfball             | NA   | NA       | NA    | NA    | NA       | NA    | NA     | NA       | NA    | NA    | NA       | NA    | NA    | NA       | NA    |
| Modern Pentathlon    | NA   | NA       | NA    | NA    | NA       | NA    | NA     | NA       | NA    | NA    | NA       | NA    | NA    | NA       | NA    |
| Motorsport           | NA   | NA       | NA    | NA    | NA       | NA    | NA     | NA       | NA    | NA    | NA       | NA    | NA    | NA       | NA    |
| Other combat sports  | 2.67 | 4.57     | 6.92  | 4.24  | 6.27     | 8.81  | 5.84   | 7.81     | 10.43 | 6.91  | 9.72     | 14.38 | 8.81  | 13.33    | 22.84 |
| Rowing               | NA   | NA       | NA    | NA    | NA       | NA    | NA     | NA       | NA    | NA    | NA       | NA    | NA    | NA       | NA    |
| Rugby                | 3.70 | 5.93     | 8.74  | 6.97  | 9.77     | 13.23 | 10.82  | 13.82    | 17.65 | 14.43 | 19.55    | 27.39 | 21.85 | 32.22    | 51.54 |
| Sailing              | NA   | NA       | NA    | NA    | NA       | NA    | NA     | NA       | NA    | NA    | NA       | NA    | NA    | NA       | NA    |
| Soccer               | 3.26 | 4.57     | 6.01  | 4.79  | 6.12     | 7.63  | 6.26   | 7.50     | 8.99  | 7.38  | 9.19     | 11.75 | 9.36  | 12.31    | 17.25 |
| Surf                 | NA   | NA       | NA    | NA    | NA       | NA    | NA     | NA       | NA    | NA    | NA       | NA    | NA    | NA       | NA    |
| Swimming             | 2.98 | 4.20     | 5.57  | 4.63  | 5.93     | 7.41  | 6.28   | 7.53     | 9.03  | 7.66  | 9.57     | 12.26 | 10.18 | 13.51    | 19.04 |
| Tennis               | 2.87 | 5.65     | 9.45  | 5.01  | 8.19     | 12.52 | 7.39   | 10.60    | 15.21 | 8.98  | 13.72    | 22.43 | 11.89 | 19.88    | 39.21 |
| Triathlon            | 3.70 | 4.62     | 5.56  | 4.91  | 5.77     | 6.68  | 5.97   | 6.73     | 7.59  | 6.78  | 7.85     | 9.23  | 8.14  | 9.79     | 12.23 |
| Volleyball           | 4.64 | 7.07     | 9.83  | 6.88  | 9.35     | 12.24 | 9.04   | 11.35    | 14.24 | 10.53 | 13.78    | 18.72 | 13.10 | 18.22    | 27.74 |
| Wrestling and Judo   | 3.28 | 4.34     | 5.49  | 4.83  | 5.92     | 7.13  | 6.32   | 7.35     | 8.55  | 7.57  | 9.12     | 11.19 | 9.84  | 12.45    | 16.47 |

NA: data not presented for n &lt; 8.

\*Whole-body minus the head

**Table 11 – Subtotal\* fat mass (%) percentiles by sport and sex**

| Sport                | 0.05  |              |       | 0.25  |              |       | Median |              |       | 0.75  |              |       | 0.95  |              |       |
|----------------------|-------|--------------|-------|-------|--------------|-------|--------|--------------|-------|-------|--------------|-------|-------|--------------|-------|
|                      | Low   | Estimate     | High  | Low   | Estimate     | High  | Low    | Estimate     | High  | Low   | Estimate     | High  | Low   | Estimate     | High  |
| <b>Females</b>       |       |              |       |       |              |       |        |              |       |       |              |       |       |              |       |
| Archery and Shooting | NA    | NA           | NA    | NA    | NA           | NA    | NA     | NA           | NA    | NA    | NA           | NA    | NA    | NA           | NA    |
| Athletics            | 4.84  | <b>11.33</b> | 16.00 | 11.24 | <b>15.62</b> | 19.24 | 15.70  | <b>18.60</b> | 21.49 | 17.95 | <b>21.58</b> | 25.95 | 21.19 | <b>25.87</b> | 32.35 |
| Basketball           | 13.33 | <b>18.03</b> | 21.76 | 19.58 | <b>22.82</b> | 25.66 | 23.93  | <b>26.15</b> | 28.37 | 26.64 | <b>29.48</b> | 32.71 | 30.53 | <b>34.27</b> | 38.97 |
| Fencing              | NA    | NA           | NA    | NA    | NA           | NA    | NA     | NA           | NA    | NA    | NA           | NA    | NA    | NA           | NA    |
| Gymnastics           | 6.64  | <b>15.32</b> | 21.37 | 14.34 | <b>20.19</b> | 24.95 | 19.70  | <b>23.57</b> | 27.44 | 22.18 | <b>26.95</b> | 32.79 | 25.76 | <b>31.81</b> | 40.50 |
| Handball             | NA    | NA           | NA    | NA    | NA           | NA    | NA     | NA           | NA    | NA    | NA           | NA    | NA    | NA           | NA    |
| Hockey Rink          | NA    | NA           | NA    | NA    | NA           | NA    | NA     | NA           | NA    | NA    | NA           | NA    | NA    | NA           | NA    |
| Korfball             | NA    | NA           | NA    | NA    | NA           | NA    | NA     | NA           | NA    | NA    | NA           | NA    | NA    | NA           | NA    |
| Modern Pentathlon    | NA    | NA           | NA    | NA    | NA           | NA    | NA     | NA           | NA    | NA    | NA           | NA    | NA    | NA           | NA    |
| Motorsport           | NA    | NA           | NA    | NA    | NA           | NA    | NA     | NA           | NA    | NA    | NA           | NA    | NA    | NA           | NA    |
| Other combat sports  | NA    | NA           | NA    | NA    | NA           | NA    | NA     | NA           | NA    | NA    | NA           | NA    | NA    | NA           | NA    |
| Rowing               | NA    | NA           | NA    | NA    | NA           | NA    | NA     | NA           | NA    | NA    | NA           | NA    | NA    | NA           | NA    |
| Rugby                | NA    | NA           | NA    | NA    | NA           | NA    | NA     | NA           | NA    | NA    | NA           | NA    | NA    | NA           | NA    |
| Sailing              | NA    | NA           | NA    | NA    | NA           | NA    | NA     | NA           | NA    | NA    | NA           | NA    | NA    | NA           | NA    |
| Soccer               | NA    | NA           | NA    | NA    | NA           | NA    | NA     | NA           | NA    | NA    | NA           | NA    | NA    | NA           | NA    |
| Surf                 | NA    | NA           | NA    | NA    | NA           | NA    | NA     | NA           | NA    | NA    | NA           | NA    | NA    | NA           | NA    |
| Swimming             | 14.53 | <b>18.56</b> | 21.63 | 18.89 | <b>21.68</b> | 24.08 | 21.92  | <b>23.86</b> | 25.79 | 23.63 | <b>26.03</b> | 28.82 | 26.08 | <b>29.15</b> | 33.19 |
| Tennis               | NA    | NA           | NA    | NA    | NA           | NA    | NA     | NA           | NA    | NA    | NA           | NA    | NA    | NA           | NA    |
| Triathlon            | 0.00  | <b>10.54</b> | 18.43 | 8.82  | <b>16.61</b> | 22.75 | 15.92  | <b>20.84</b> | 25.76 | 18.92 | <b>25.06</b> | 32.85 | 23.25 | <b>31.13</b> | 43.05 |
| Volleyball           | 11.36 | <b>18.38</b> | 23.51 | 18.21 | <b>22.99</b> | 27.00 | 22.98  | <b>26.20</b> | 29.43 | 25.41 | <b>29.40</b> | 34.20 | 28.90 | <b>34.01</b> | 41.05 |
| Wrestling and Judo   | 4.52  | <b>13.75</b> | 20.33 | 13.45 | <b>19.65</b> | 24.75 | 19.66  | <b>23.74</b> | 27.82 | 22.73 | <b>27.84</b> | 34.02 | 27.15 | <b>33.74</b> | 42.95 |
| <b>Males</b>         |       |              |       |       |              |       |        |              |       |       |              |       |       |              |       |
| Archery and Shooting | NA    | NA           | NA    | NA    | NA           | NA    | NA     | NA           | NA    | NA    | NA           | NA    | NA    | NA           | NA    |
| Athletics            | 0.00  | <b>5.48</b>  | 9.16  | 4.75  | <b>8.39</b>  | 11.24 | 8.14   | <b>10.42</b> | 12.69 | 9.59  | <b>12.45</b> | 16.08 | 11.68 | <b>15.37</b> | 20.96 |
| Basketball           | 4.52  | <b>7.81</b>  | 10.46 | 9.48  | <b>11.72</b> | 13.70 | 12.93  | <b>14.43</b> | 15.95 | 15.18 | <b>17.15</b> | 19.40 | 18.42 | <b>21.06</b> | 24.36 |
| Fencing              | NA    | NA           | NA    | NA    | NA           | NA    | NA     | NA           | NA    | NA    | NA           | NA    | NA    | NA           | NA    |
| Gymnastics           | NA    | NA           | NA    | NA    | NA           | NA    | NA     | NA           | NA    | NA    | NA           | NA    | NA    | NA           | NA    |
| Handball             | 2.20  | <b>7.22</b>  | 11.14 | 9.07  | <b>12.44</b> | 15.36 | 13.83  | <b>16.07</b> | 18.30 | 16.77 | <b>19.69</b> | 23.07 | 20.99 | <b>24.91</b> | 29.93 |
| Hockey Rink          | NA    | NA           | NA    | NA    | NA           | NA    | NA     | NA           | NA    | NA    | NA           | NA    | NA    | NA           | NA    |
| Korfball             | NA    | NA           | NA    | NA    | NA           | NA    | NA     | NA           | NA    | NA    | NA           | NA    | NA    | NA           | NA    |
| Modern Pentathlon    | NA    | NA           | NA    | NA    | NA           | NA    | NA     | NA           | NA    | NA    | NA           | NA    | NA    | NA           | NA    |
| Motorsport           | NA    | NA           | NA    | NA    | NA           | NA    | NA     | NA           | NA    | NA    | NA           | NA    | NA    | NA           | NA    |
| Other combat sports  | 0.81  | <b>6.90</b>  | 11.08 | 6.37  | <b>10.40</b> | 13.65 | 10.24  | <b>12.84</b> | 15.43 | 12.02 | <b>15.27</b> | 19.30 | 14.59 | <b>18.77</b> | 24.86 |
| Rowing               | NA    | NA           | NA    | NA    | NA           | NA    | NA     | NA           | NA    | NA    | NA           | NA    | NA    | NA           | NA    |
| Rugby                | 0.97  | <b>7.10</b>  | 11.92 | 9.68  | <b>13.79</b> | 17.36 | 15.73  | <b>18.44</b> | 21.14 | 19.51 | <b>23.09</b> | 27.19 | 24.95 | <b>29.78</b> | 35.90 |
| Sailing              | NA    | NA           | NA    | NA    | NA           | NA    | NA     | NA           | NA    | NA    | NA           | NA    | NA    | NA           | NA    |
| Soccer               | 3.17  | <b>6.55</b>  | 9.14  | 7.31  | <b>9.59</b>  | 11.56 | 10.18  | <b>11.71</b> | 13.23 | 11.86 | <b>13.82</b> | 16.11 | 14.28 | <b>16.87</b> | 20.25 |
| Surf                 | NA    | NA           | NA    | NA    | NA           | NA    | NA     | NA           | NA    | NA    | NA           | NA    | NA    | NA           | NA    |
| Swimming             | 2.66  | <b>6.10</b>  | 8.80  | 7.35  | <b>9.67</b>  | 11.70 | 10.61  | <b>12.16</b> | 13.71 | 12.62 | <b>14.64</b> | 16.97 | 15.51 | <b>18.21</b> | 21.65 |
| Tennis               | 0.00  | <b>8.37</b>  | 14.76 | 7.14  | <b>13.45</b> | 18.38 | 13.05  | <b>16.97</b> | 20.90 | 15.57 | <b>20.50</b> | 26.81 | 19.18 | <b>25.57</b> | 35.31 |
| Triathlon            | 4.82  | <b>7.20</b>  | 9.09  | 8.06  | <b>9.69</b>  | 11.12 | 10.31  | <b>11.42</b> | 12.53 | 11.73 | <b>13.15</b> | 14.78 | 13.76 | <b>15.64</b> | 18.02 |
| Volleyball           | 3.09  | <b>8.30</b>  | 12.05 | 8.33  | <b>11.81</b> | 14.70 | 11.96  | <b>14.25</b> | 16.54 | 13.80 | <b>16.68</b> | 20.17 | 16.45 | <b>20.19</b> | 25.41 |
| Wrestling and Judo   | 3.49  | <b>6.26</b>  | 8.48  | 7.63  | <b>9.51</b>  | 11.17 | 10.51  | <b>11.77</b> | 13.04 | 12.38 | <b>14.04</b> | 15.92 | 15.07 | <b>17.29</b> | 20.06 |

NA: data not presented for n < 8.

\*Whole-body minus the head

Table 12 – Subtotal\* fat-free mass (kg) percentiles by sport and sex

| Sport                | 0.05  |              |       | 0.25  |              |       | Median |              |       | 0.75  |              |       | 0.95  |              |       |
|----------------------|-------|--------------|-------|-------|--------------|-------|--------|--------------|-------|-------|--------------|-------|-------|--------------|-------|
|                      | Low   | Estimate     | High  | Low   | Estimate     | High  | Low    | Estimate     | High  | Low   | Estimate     | High  | Low   | Estimate     | High  |
| <b>Females</b>       |       |              |       |       |              |       |        |              |       |       |              |       |       |              |       |
| Archery and Shooting | NA    | NA           | NA    | NA    | NA           | NA    | NA     | NA           | NA    | NA    | NA           | NA    | NA    | NA           | NA    |
| Athletics            | 34.65 | <b>37.21</b> | 39.81 | 39.70 | <b>42.25</b> | 44.84 | 43.21  | <b>45.76</b> | 48.34 | 46.71 | <b>49.26</b> | 51.85 | 51.74 | <b>54.31</b> | 56.90 |
| Basketball           | 34.94 | <b>36.69</b> | 38.44 | 39.99 | <b>41.73</b> | 43.47 | 43.50  | <b>45.24</b> | 46.97 | 47.00 | <b>48.74</b> | 50.48 | 52.03 | <b>53.78</b> | 55.54 |
| Fencing              | NA    | NA           | NA    | NA    | NA           | NA    | NA     | NA           | NA    | NA    | NA           | NA    | NA    | NA           | NA    |
| Gymnastics           | 24.19 | <b>26.17</b> | 30.13 | 29.25 | <b>31.21</b> | 35.16 | 32.76  | <b>34.71</b> | 38.66 | 36.26 | <b>38.22</b> | 42.17 | 41.29 | <b>43.26</b> | 47.22 |
| Handball             | NA    | NA           | NA    | NA    | NA           | NA    | NA     | NA           | NA    | NA    | NA           | NA    | NA    | NA           | NA    |
| Hockey Rink          | NA    | NA           | NA    | NA    | NA           | NA    | NA     | NA           | NA    | NA    | NA           | NA    | NA    | NA           | NA    |
| Korfball             | NA    | NA           | NA    | NA    | NA           | NA    | NA     | NA           | NA    | NA    | NA           | NA    | NA    | NA           | NA    |
| Modern Pentathlon    | NA    | NA           | NA    | NA    | NA           | NA    | NA     | NA           | NA    | NA    | NA           | NA    | NA    | NA           | NA    |
| Motorsport           | NA    | NA           | NA    | NA    | NA           | NA    | NA     | NA           | NA    | NA    | NA           | NA    | NA    | NA           | NA    |
| Other combat sports  | NA    | NA           | NA    | NA    | NA           | NA    | NA     | NA           | NA    | NA    | NA           | NA    | NA    | NA           | NA    |
| Rowing               | NA    | NA           | NA    | NA    | NA           | NA    | NA     | NA           | NA    | NA    | NA           | NA    | NA    | NA           | NA    |
| Rugby                | NA    | NA           | NA    | NA    | NA           | NA    | NA     | NA           | NA    | NA    | NA           | NA    | NA    | NA           | NA    |
| Sailing              | NA    | NA           | NA    | NA    | NA           | NA    | NA     | NA           | NA    | NA    | NA           | NA    | NA    | NA           | NA    |
| Soccer               | NA    | NA           | NA    | NA    | NA           | NA    | NA     | NA           | NA    | NA    | NA           | NA    | NA    | NA           | NA    |
| Surf                 | NA    | NA           | NA    | NA    | NA           | NA    | NA     | NA           | NA    | NA    | NA           | NA    | NA    | NA           | NA    |
| Swimming             | 30.70 | <b>32.88</b> | 35.10 | 35.75 | <b>37.93</b> | 40.13 | 39.26  | <b>41.43</b> | 43.62 | 42.76 | <b>44.93</b> | 47.14 | 47.79 | <b>49.98</b> | 52.19 |
| Tennis               | NA    | NA           | NA    | NA    | NA           | NA    | NA     | NA           | NA    | NA    | NA           | NA    | NA    | NA           | NA    |
| Triathlon            | 28.27 | <b>31.10</b> | 34.78 | 33.32 | <b>36.14</b> | 39.81 | 36.83  | <b>39.65</b> | 43.30 | 40.33 | <b>43.15</b> | 46.82 | 45.36 | <b>48.19</b> | 51.87 |
| Volleyball           | 33.92 | <b>36.51</b> | 39.09 | 38.98 | <b>41.55</b> | 44.12 | 42.49  | <b>45.05</b> | 47.62 | 45.98 | <b>48.56</b> | 51.13 | 51.02 | <b>53.60</b> | 56.18 |
| Wrestling and Judo   | 29.45 | <b>32.11</b> | 34.76 | 34.50 | <b>37.15</b> | 39.80 | 38.01  | <b>40.65</b> | 43.29 | 41.51 | <b>44.16</b> | 46.81 | 46.54 | <b>49.20</b> | 51.86 |
| <b>Males</b>         |       |              |       |       |              |       |        |              |       |       |              |       |       |              |       |
| Archery and Shooting | NA    | NA           | NA    | NA    | NA           | NA    | NA     | NA           | NA    | NA    | NA           | NA    | NA    | NA           | NA    |
| Athletics            | 37.17 | <b>49.31</b> | 58.69 | 48.05 | <b>56.82</b> | 64.46 | 55.61  | <b>62.04</b> | 68.47 | 59.63 | <b>67.26</b> | 76.03 | 65.40 | <b>74.77</b> | 86.91 |
| Basketball           | 45.40 | <b>51.87</b> | 57.29 | 55.14 | <b>59.75</b> | 63.94 | 61.91  | <b>65.23</b> | 68.55 | 66.52 | <b>70.71</b> | 75.32 | 73.16 | <b>78.59</b> | 85.06 |
| Fencing              | NA    | NA           | NA    | NA    | NA           | NA    | NA     | NA           | NA    | NA    | NA           | NA    | NA    | NA           | NA    |
| Gymnastics           | NA    | NA           | NA    | NA    | NA           | NA    | NA     | NA           | NA    | NA    | NA           | NA    | NA    | NA           | NA    |
| Handball             | 45.12 | <b>52.37</b> | 58.36 | 54.99 | <b>60.17</b> | 64.82 | 61.85  | <b>65.58</b> | 69.32 | 66.34 | <b>71.00</b> | 76.18 | 72.81 | <b>78.80</b> | 86.04 |
| Hockey Rink          | NA    | NA           | NA    | NA    | NA           | NA    | NA     | NA           | NA    | NA    | NA           | NA    | NA    | NA           | NA    |
| Korfball             | NA    | NA           | NA    | NA    | NA           | NA    | NA     | NA           | NA    | NA    | NA           | NA    | NA    | NA           | NA    |
| Modern Pentathlon    | NA    | NA           | NA    | NA    | NA           | NA    | NA     | NA           | NA    | NA    | NA           | NA    | NA    | NA           | NA    |
| Motorsport           | NA    | NA           | NA    | NA    | NA           | NA    | NA     | NA           | NA    | NA    | NA           | NA    | NA    | NA           | NA    |
| Other combat sports  | 30.27 | <b>43.30</b> | 53.37 | 42.74 | <b>52.05</b> | 60.15 | 51.42  | <b>58.14</b> | 64.86 | 56.13 | <b>64.22</b> | 73.53 | 62.91 | <b>72.97</b> | 86.01 |
| Rowing               | NA    | NA           | NA    | NA    | NA           | NA    | NA     | NA           | NA    | NA    | NA           | NA    | NA    | NA           | NA    |
| Rugby                | 44.79 | <b>52.44</b> | 58.78 | 55.61 | <b>61.05</b> | 65.96 | 63.13  | <b>67.04</b> | 70.95 | 68.12 | <b>73.03</b> | 78.47 | 75.30 | <b>81.64</b> | 89.29 |
| Sailing              | NA    | NA           | NA    | NA    | NA           | NA    | NA     | NA           | NA    | NA    | NA           | NA    | NA    | NA           | NA    |
| Soccer               | 41.02 | <b>48.29</b> | 54.19 | 50.02 | <b>55.21</b> | 59.83 | 56.28  | <b>60.01</b> | 63.75 | 60.20 | <b>64.82</b> | 70.01 | 65.84 | <b>71.73</b> | 79.00 |
| Surf                 | NA    | NA           | NA    | NA    | NA           | NA    | NA     | NA           | NA    | NA    | NA           | NA    | NA    | NA           | NA    |
| Swimming             | 37.98 | <b>45.17</b> | 51.08 | 47.81 | <b>52.93</b> | 57.52 | 54.65  | <b>58.32</b> | 61.99 | 59.12 | <b>63.71</b> | 68.82 | 65.55 | <b>71.47</b> | 78.66 |
| Tennis               | 27.75 | <b>42.56</b> | 53.92 | 41.24 | <b>51.84</b> | 61.02 | 50.62  | <b>58.29</b> | 65.96 | 55.56 | <b>64.74</b> | 75.34 | 62.67 | <b>74.02</b> | 88.83 |
| Triathlon            | 37.59 | <b>43.50</b> | 48.38 | 45.75 | <b>49.97</b> | 53.76 | 51.43  | <b>54.46</b> | 57.49 | 55.16 | <b>58.95</b> | 63.17 | 60.54 | <b>65.42</b> | 71.33 |
| Volleyball           | 52.63 | <b>61.82</b> | 69.09 | 61.99 | <b>68.63</b> | 74.48 | 68.50  | <b>73.37</b> | 78.23 | 72.25 | <b>78.10</b> | 84.74 | 77.64 | <b>84.92</b> | 94.11 |
| Wrestling and Judo   | 38.56 | <b>45.01</b> | 50.38 | 48.22 | <b>52.80</b> | 56.93 | 54.93  | <b>58.21</b> | 61.49 | 59.49 | <b>63.63</b> | 68.20 | 66.04 | <b>71.42</b> | 77.86 |

NA: data not presented for n &lt; 8.

\*Whole-body minus the head

Table 13 – Subtotal\* lean soft tissue (kg) percentiles by sport and sex

| Sport                | 0.05  |              |       | 0.25  |              |       | Median |              |       | 0.75  |              |       | 0.95  |              |       |
|----------------------|-------|--------------|-------|-------|--------------|-------|--------|--------------|-------|-------|--------------|-------|-------|--------------|-------|
|                      | Low   | Estimate     | High  | Low   | Estimate     | High  | Low    | Estimate     | High  | Low   | Estimate     | High  | Low   | Estimate     | High  |
| <b>Females</b>       |       |              |       |       |              |       |        |              |       |       |              |       |       |              |       |
| Archery and Shooting | NA    | NA           | NA    | NA    | NA           | NA    | NA     | NA           | NA    | NA    | NA           | NA    | NA    | NA           | NA    |
| Athletics            | 33.41 | <b>35.90</b> | 38.41 | 38.23 | <b>40.70</b> | 43.19 | 41.58  | <b>44.03</b> | 46.51 | 44.90 | <b>47.37</b> | 49.86 | 49.68 | <b>52.17</b> | 54.68 |
| Basketball           | 33.42 | <b>35.14</b> | 36.84 | 38.24 | <b>39.94</b> | 41.61 | 41.59  | <b>43.28</b> | 44.93 | 44.91 | <b>46.61</b> | 48.29 | 49.69 | <b>51.41</b> | 53.11 |
| Fencing              | NA    | NA           | NA    | NA    | NA           | NA    | NA     | NA           | NA    | NA    | NA           | NA    | NA    | NA           | NA    |
| Gymnastics           | 23.47 | <b>26.30</b> | 29.18 | 28.30 | <b>31.10</b> | 33.95 | 31.65  | <b>34.44</b> | 37.27 | 34.97 | <b>37.77</b> | 40.62 | 39.74 | <b>42.57</b> | 45.45 |
| Handball             | NA    | NA           | NA    | NA    | NA           | NA    | NA     | NA           | NA    | NA    | NA           | NA    | NA    | NA           | NA    |
| Hockey Rink          | NA    | NA           | NA    | NA    | NA           | NA    | NA     | NA           | NA    | NA    | NA           | NA    | NA    | NA           | NA    |
| Korfball             | NA    | NA           | NA    | NA    | NA           | NA    | NA     | NA           | NA    | NA    | NA           | NA    | NA    | NA           | NA    |
| Modern Pentathlon    | NA    | NA           | NA    | NA    | NA           | NA    | NA     | NA           | NA    | NA    | NA           | NA    | NA    | NA           | NA    |
| Motorsport           | NA    | NA           | NA    | NA    | NA           | NA    | NA     | NA           | NA    | NA    | NA           | NA    | NA    | NA           | NA    |
| Other combat sports  | NA    | NA           | NA    | NA    | NA           | NA    | NA     | NA           | NA    | NA    | NA           | NA    | NA    | NA           | NA    |
| Rowing               | NA    | NA           | NA    | NA    | NA           | NA    | NA     | NA           | NA    | NA    | NA           | NA    | NA    | NA           | NA    |
| Rugby                | NA    | NA           | NA    | NA    | NA           | NA    | NA     | NA           | NA    | NA    | NA           | NA    | NA    | NA           | NA    |
| Sailing              | NA    | NA           | NA    | NA    | NA           | NA    | NA     | NA           | NA    | NA    | NA           | NA    | NA    | NA           | NA    |
| Soccer               | NA    | NA           | NA    | NA    | NA           | NA    | NA     | NA           | NA    | NA    | NA           | NA    | NA    | NA           | NA    |
| Surf                 | NA    | NA           | NA    | NA    | NA           | NA    | NA     | NA           | NA    | NA    | NA           | NA    | NA    | NA           | NA    |
| Swimming             | 29.73 | <b>31.89</b> | 34.02 | 34.55 | <b>36.69</b> | 38.79 | 37.90  | <b>40.02</b> | 42.12 | 41.22 | <b>43.36</b> | 45.47 | 46.00 | <b>48.16</b> | 50.29 |
| Tennis               | NA    | NA           | NA    | NA    | NA           | NA    | NA     | NA           | NA    | NA    | NA           | NA    | NA    | NA           | NA    |
| Triathlon            | 27.73 | <b>30.98</b> | 33.98 | 32.55 | <b>35.78</b> | 38.76 | 35.90  | <b>39.12</b> | 42.08 | 39.22 | <b>42.46</b> | 45.43 | 44.00 | <b>47.26</b> | 50.25 |
| Volleyball           | 32.69 | <b>35.20</b> | 37.71 | 37.52 | <b>40.00</b> | 42.48 | 40.87  | <b>43.34</b> | 45.80 | 44.19 | <b>46.67</b> | 49.15 | 48.97 | <b>51.47</b> | 53.98 |
| Wrestling and Judo   | 28.39 | <b>30.94</b> | 33.49 | 33.21 | <b>35.74</b> | 38.27 | 36.56  | <b>39.07</b> | 41.59 | 39.88 | <b>42.41</b> | 44.94 | 44.66 | <b>47.21</b> | 49.76 |
| <b>Males</b>         |       |              |       |       |              |       |        |              |       |       |              |       |       |              |       |
| Archery and Shooting | NA    | NA           | NA    | NA    | NA           | NA    | NA     | NA           | NA    | NA    | NA           | NA    | NA    | NA           | NA    |
| Athletics            | 40.54 | <b>48.91</b> | 55.39 | 47.87 | <b>53.98</b> | 59.29 | 52.96  | <b>57.50</b> | 62.00 | 55.67 | <b>61.02</b> | 67.09 | 59.57 | <b>66.08</b> | 74.42 |
| Basketball           | 44.22 | <b>50.03</b> | 54.89 | 52.91 | <b>57.06</b> | 60.82 | 58.95  | <b>61.94</b> | 64.93 | 63.07 | <b>66.83</b> | 70.97 | 68.99 | <b>73.85</b> | 79.66 |
| Fencing              | NA    | NA           | NA    | NA    | NA           | NA    | NA     | NA           | NA    | NA    | NA           | NA    | NA    | NA           | NA    |
| Gymnastics           | NA    | NA           | NA    | NA    | NA           | NA    | NA     | NA           | NA    | NA    | NA           | NA    | NA    | NA           | NA    |
| Handball             | 44.14 | <b>50.53</b> | 55.81 | 52.83 | <b>57.39</b> | 61.49 | 58.86  | <b>62.16</b> | 65.45 | 62.82 | <b>66.92</b> | 71.49 | 68.51 | <b>73.78</b> | 80.17 |
| Hockey Rink          | NA    | NA           | NA    | NA    | NA           | NA    | NA     | NA           | NA    | NA    | NA           | NA    | NA    | NA           | NA    |
| Korfball             | NA    | NA           | NA    | NA    | NA           | NA    | NA     | NA           | NA    | NA    | NA           | NA    | NA    | NA           | NA    |
| Modern Pentathlon    | NA    | NA           | NA    | NA    | NA           | NA    | NA     | NA           | NA    | NA    | NA           | NA    | NA    | NA           | NA    |
| Motorsport           | NA    | NA           | NA    | NA    | NA           | NA    | NA     | NA           | NA    | NA    | NA           | NA    | NA    | NA           | NA    |
| Other combat sports  | 33.91 | <b>43.42</b> | 50.79 | 42.86 | <b>49.70</b> | 55.67 | 49.08  | <b>54.07</b> | 59.06 | 52.47 | <b>58.44</b> | 65.29 | 57.35 | <b>64.73</b> | 74.24 |
| Rowing               | NA    | NA           | NA    | NA    | NA           | NA    | NA     | NA           | NA    | NA    | NA           | NA    | NA    | NA           | NA    |
| Rugby                | 43.16 | <b>50.23</b> | 56.09 | 53.11 | <b>58.15</b> | 62.69 | 60.02  | <b>63.65</b> | 67.27 | 64.61 | <b>69.15</b> | 74.19 | 71.21 | <b>77.06</b> | 84.14 |
| Sailing              | NA    | NA           | NA    | NA    | NA           | NA    | NA     | NA           | NA    | NA    | NA           | NA    | NA    | NA           | NA    |
| Soccer               | 42.22 | <b>47.82</b> | 52.37 | 49.04 | <b>53.06</b> | 56.66 | 53.78  | <b>56.71</b> | 59.64 | 56.76 | <b>60.36</b> | 64.38 | 61.05 | <b>65.60</b> | 71.20 |
| Surf                 | NA    | NA           | NA    | NA    | NA           | NA    | NA     | NA           | NA    | NA    | NA           | NA    | NA    | NA           | NA    |
| Swimming             | 38.90 | <b>44.82</b> | 49.71 | 46.93 | <b>51.16</b> | 54.97 | 52.52  | <b>55.57</b> | 58.63 | 56.17 | <b>59.98</b> | 64.21 | 61.44 | <b>66.32</b> | 72.25 |
| Tennis               | 31.42 | <b>42.51</b> | 51.02 | 41.37 | <b>49.34</b> | 56.27 | 48.28  | <b>54.10</b> | 59.92 | 51.92 | <b>58.85</b> | 66.83 | 57.17 | <b>65.69</b> | 76.77 |
| Triathlon            | 40.10 | <b>44.28</b> | 47.75 | 45.76 | <b>48.77</b> | 51.49 | 49.70  | <b>51.89</b> | 54.09 | 52.30 | <b>55.02</b> | 58.03 | 56.03 | <b>59.51</b> | 63.69 |
| Volleyball           | 49.60 | <b>58.14</b> | 64.89 | 58.28 | <b>64.44</b> | 69.88 | 64.31  | <b>68.83</b> | 73.34 | 67.78 | <b>73.21</b> | 79.38 | 72.76 | <b>79.52</b> | 88.05 |
| Wrestling and Judo   | 38.57 | <b>44.06</b> | 48.65 | 46.74 | <b>50.65</b> | 54.20 | 52.43  | <b>55.24</b> | 58.06 | 56.28 | <b>59.83</b> | 63.74 | 61.83 | <b>66.42</b> | 71.91 |

NA: data not presented for n &lt; 8.

\*Whole-body minus the head

Table 14 – Appendicular \* bone mineral content (g) percentiles by sport and sex

| Sport                | 0.05 |             |      | 0.25 |             |      | Median |             |      | 0.75 |             |      | 0.95 |             |      |
|----------------------|------|-------------|------|------|-------------|------|--------|-------------|------|------|-------------|------|------|-------------|------|
|                      | Low  | Estimate    | High | Low  | Estimate    | High | Low    | Estimate    | High | Low  | Estimate    | High | Low  | Estimate    | High |
| <b>Females</b>       |      |             |      |      |             |      |        |             |      |      |             |      |      |             |      |
| Archery and Shooting | NA   | NA          | NA   | NA   | NA          | NA   | NA     | NA          | NA   | NA   | NA          | NA   | NA   | NA          | NA   |
| Athletics            | 625  | <b>924</b>  | 1153 | 929  | <b>1139</b> | 1320 | 1139   | <b>1287</b> | 1435 | 1255 | <b>1436</b> | 1646 | 1421 | <b>1650</b> | 1950 |
| Basketball           | 613  | <b>875</b>  | 1087 | 972  | <b>1154</b> | 1316 | 1221   | <b>1348</b> | 1475 | 1381 | <b>1542</b> | 1725 | 1610 | <b>1822</b> | 2084 |
| Fencing              | NA   | NA          | NA   | NA   | NA          | NA   | NA     | NA          | NA   | NA   | NA          | NA   | NA   | NA          | NA   |
| Gymnastics           | 307  | <b>648</b>  | 901  | 625  | <b>862</b>  | 1064 | 846    | <b>1012</b> | 1177 | 959  | <b>1161</b> | 1398 | 1122 | <b>1376</b> | 1717 |
| Handball             | NA   | NA          | NA   | NA   | NA          | NA   | NA     | NA          | NA   | NA   | NA          | NA   | NA   | NA          | NA   |
| Hockey Rink          | NA   | NA          | NA   | NA   | NA          | NA   | NA     | NA          | NA   | NA   | NA          | NA   | NA   | NA          | NA   |
| Korfball             | NA   | NA          | NA   | NA   | NA          | NA   | NA     | NA          | NA   | NA   | NA          | NA   | NA   | NA          | NA   |
| Modern Pentathlon    | NA   | NA          | NA   | NA   | NA          | NA   | NA     | NA          | NA   | NA   | NA          | NA   | NA   | NA          | NA   |
| Motorsport           | NA   | NA          | NA   | NA   | NA          | NA   | NA     | NA          | NA   | NA   | NA          | NA   | NA   | NA          | NA   |
| Other combat sports  | NA   | NA          | NA   | NA   | NA          | NA   | NA     | NA          | NA   | NA   | NA          | NA   | NA   | NA          | NA   |
| Rowing               | NA   | NA          | NA   | NA   | NA          | NA   | NA     | NA          | NA   | NA   | NA          | NA   | NA   | NA          | NA   |
| Rugby                | NA   | NA          | NA   | NA   | NA          | NA   | NA     | NA          | NA   | NA   | NA          | NA   | NA   | NA          | NA   |
| Sailing              | NA   | NA          | NA   | NA   | NA          | NA   | NA     | NA          | NA   | NA   | NA          | NA   | NA   | NA          | NA   |
| Soccer               | NA   | NA          | NA   | NA   | NA          | NA   | NA     | NA          | NA   | NA   | NA          | NA   | NA   | NA          | NA   |
| Surf                 | NA   | NA          | NA   | NA   | NA          | NA   | NA     | NA          | NA   | NA   | NA          | NA   | NA   | NA          | NA   |
| Swimming             | 467  | <b>691</b>  | 865  | 722  | <b>879</b>  | 1015 | 900    | <b>1009</b> | 1118 | 1004 | <b>1140</b> | 1296 | 1153 | <b>1328</b> | 1551 |
| Tennis               | NA   | NA          | NA   | NA   | NA          | NA   | NA     | NA          | NA   | NA   | NA          | NA   | NA   | NA          | NA   |
| Triathlon            | 328  | <b>665</b>  | 913  | 623  | <b>859</b>  | 1059 | 828    | <b>994</b>  | 1160 | 929  | <b>1129</b> | 1365 | 1075 | <b>1324</b> | 1660 |
| Volleyball           | 611  | <b>911</b>  | 1140 | 915  | <b>1125</b> | 1307 | 1126   | <b>1274</b> | 1423 | 1242 | <b>1424</b> | 1634 | 1409 | <b>1638</b> | 1938 |
| Wrestling and Judo   | 503  | <b>811</b>  | 1045 | 810  | <b>1026</b> | 1211 | 1023   | <b>1175</b> | 1326 | 1139 | <b>1324</b> | 1540 | 1305 | <b>1539</b> | 1847 |
| <b>Males</b>         |      |             |      |      |             |      |        |             |      |      |             |      |      |             |      |
| Archery and Shooting | NA   | NA          | NA   | NA   | NA          | NA   | NA     | NA          | NA   | NA   | NA          | NA   | NA   | NA          | NA   |
| Athletics            | 718  | <b>1116</b> | 1430 | 1092 | <b>1382</b> | 1637 | 1352   | <b>1567</b> | 1781 | 1496 | <b>1752</b> | 2041 | 1704 | <b>2018</b> | 2415 |
| Basketball           | 997  | <b>1246</b> | 1456 | 1386 | <b>1563</b> | 1724 | 1657   | <b>1783</b> | 1910 | 1843 | <b>2003</b> | 2180 | 2110 | <b>2320</b> | 2570 |
| Fencing              | NA   | NA          | NA   | NA   | NA          | NA   | NA     | NA          | NA   | NA   | NA          | NA   | NA   | NA          | NA   |
| Gymnastics           | NA   | NA          | NA   | NA   | NA          | NA   | NA     | NA          | NA   | NA   | NA          | NA   | NA   | NA          | NA   |
| Handball             | 1038 | <b>1289</b> | 1498 | 1393 | <b>1572</b> | 1733 | 1639   | <b>1768</b> | 1897 | 1803 | <b>1964</b> | 2143 | 2038 | <b>2247</b> | 2498 |
| Hockey Rink          | NA   | NA          | NA   | NA   | NA          | NA   | NA     | NA          | NA   | NA   | NA          | NA   | NA   | NA          | NA   |
| Korfball             | NA   | NA          | NA   | NA   | NA          | NA   | NA     | NA          | NA   | NA   | NA          | NA   | NA   | NA          | NA   |
| Modern Pentathlon    | NA   | NA          | NA   | NA   | NA          | NA   | NA     | NA          | NA   | NA   | NA          | NA   | NA   | NA          | NA   |
| Motorsport           | NA   | NA          | NA   | NA   | NA          | NA   | NA     | NA          | NA   | NA   | NA          | NA   | NA   | NA          | NA   |
| Other combat sports  | 604  | <b>972</b>  | 1263 | 971  | <b>1237</b> | 1471 | 1226   | <b>1421</b> | 1615 | 1370 | <b>1605</b> | 1870 | 1578 | <b>1869</b> | 2237 |
| Rowing               | NA   | NA          | NA   | NA   | NA          | NA   | NA     | NA          | NA   | NA   | NA          | NA   | NA   | NA          | NA   |
| Rugby                | 1128 | <b>1361</b> | 1555 | 1465 | <b>1632</b> | 1781 | 1699   | <b>1820</b> | 1939 | 1857 | <b>2008</b> | 2173 | 2083 | <b>2278</b> | 2510 |
| Sailing              | NA   | NA          | NA   | NA   | NA          | NA   | NA     | NA          | NA   | NA   | NA          | NA   | NA   | NA          | NA   |
| Soccer               | 943  | <b>1166</b> | 1349 | 1227 | <b>1388</b> | 1532 | 1425   | <b>1542</b> | 1659 | 1552 | <b>1696</b> | 1857 | 1734 | <b>1918</b> | 2141 |
| Surf                 | NA   | NA          | NA   | NA   | NA          | NA   | NA     | NA          | NA   | NA   | NA          | NA   | NA   | NA          | NA   |
| Swimming             | 680  | <b>904</b>  | 1091 | 1000 | <b>1159</b> | 1303 | 1222   | <b>1336</b> | 1450 | 1369 | <b>1512</b> | 1672 | 1581 | <b>1767</b> | 1992 |
| Tennis               | 571  | <b>936</b>  | 1223 | 915  | <b>1181</b> | 1414 | 1155   | <b>1351</b> | 1547 | 1288 | <b>1521</b> | 1786 | 1478 | <b>1766</b> | 2131 |
| Triathlon            | 800  | <b>958</b>  | 1091 | 1027 | <b>1140</b> | 1243 | 1184   | <b>1266</b> | 1349 | 1290 | <b>1393</b> | 1506 | 1442 | <b>1574</b> | 1733 |
| Volleyball           | 1075 | <b>1478</b> | 1801 | 1510 | <b>1800</b> | 2058 | 1812   | <b>2024</b> | 2237 | 1991 | <b>2248</b> | 2539 | 2248 | <b>2571</b> | 2974 |
| Wrestling and Judo   | 926  | <b>1120</b> | 1282 | 1223 | <b>1361</b> | 1486 | 1429   | <b>1529</b> | 1628 | 1571 | <b>1697</b> | 1835 | 1775 | <b>1938</b> | 2132 |

NA: data not presented for n &lt; 8.

\* (right arm + left arm + right leg + left leg)

Table 15 – Appendicular \* fat-mass (kg) percentiles by sport and sex

| Sport                | 0.05 |          |      | 0.25 |          |       | Median |          |       | 0.75 |          |       | 0.95  |          |       |
|----------------------|------|----------|------|------|----------|-------|--------|----------|-------|------|----------|-------|-------|----------|-------|
|                      | Low  | Estimate | High | Low  | Estimate | High  | Low    | Estimate | High  | Low  | Estimate | High  | Low   | Estimate | High  |
| <b>Females</b>       |      |          |      |      |          |       |        |          |       |      |          |       |       |          |       |
| Archery and Shooting | NA   | NA       | NA   | NA   | NA       | NA    | NA     | NA       | NA    | NA   | NA       | NA    | NA    | NA       | NA    |
| Athletics            | 2.20 | 3.75     | 5.57 | 3.53 | 5.14     | 7.07  | 4.90   | 6.40     | 8.34  | 5.79 | 7.96     | 11.59 | 7.35  | 10.91    | 18.58 |
| Basketball           | 4.63 | 6.22     | 7.92 | 6.60 | 8.17     | 9.89  | 8.45   | 9.88     | 11.55 | 9.87 | 11.94    | 14.79 | 12.33 | 15.69    | 21.10 |
| Fencing              | NA   | NA       | NA   | NA   | NA       | NA    | NA     | NA       | NA    | NA   | NA       | NA    | NA    | NA       | NA    |
| Gymnastics           | 2.35 | 4.37     | 6.81 | 3.85 | 5.94     | 8.53  | 5.42   | 7.36     | 9.98  | 6.34 | 9.10     | 14.06 | 7.94  | 12.37    | 23.02 |
| Handball             | NA   | NA       | NA   | NA   | NA       | NA    | NA     | NA       | NA    | NA   | NA       | NA    | NA    | NA       | NA    |
| Hockey Rink          | NA   | NA       | NA   | NA   | NA       | NA    | NA     | NA       | NA    | NA   | NA       | NA    | NA    | NA       | NA    |
| Korfball             | NA   | NA       | NA   | NA   | NA       | NA    | NA     | NA       | NA    | NA   | NA       | NA    | NA    | NA       | NA    |
| Modern Pentathlon    | NA   | NA       | NA   | NA   | NA       | NA    | NA     | NA       | NA    | NA   | NA       | NA    | NA    | NA       | NA    |
| Motorsport           | NA   | NA       | NA   | NA   | NA       | NA    | NA     | NA       | NA    | NA   | NA       | NA    | NA    | NA       | NA    |
| Other combat sports  | NA   | NA       | NA   | NA   | NA       | NA    | NA     | NA       | NA    | NA   | NA       | NA    | NA    | NA       | NA    |
| Rowing               | NA   | NA       | NA   | NA   | NA       | NA    | NA     | NA       | NA    | NA   | NA       | NA    | NA    | NA       | NA    |
| Rugby                | NA   | NA       | NA   | NA   | NA       | NA    | NA     | NA       | NA    | NA   | NA       | NA    | NA    | NA       | NA    |
| Sailing              | NA   | NA       | NA   | NA   | NA       | NA    | NA     | NA       | NA    | NA   | NA       | NA    | NA    | NA       | NA    |
| Soccer               | NA   | NA       | NA   | NA   | NA       | NA    | NA     | NA       | NA    | NA   | NA       | NA    | NA    | NA       | NA    |
| Surf                 | NA   | NA       | NA   | NA   | NA       | NA    | NA     | NA       | NA    | NA   | NA       | NA    | NA    | NA       | NA    |
| Swimming             | 4.19 | 5.62     | 7.06 | 5.59 | 6.90     | 8.28  | 6.82   | 7.95     | 9.26  | 7.63 | 9.16     | 11.31 | 8.96  | 11.24    | 15.07 |
| Tennis               | NA   | NA       | NA   | NA   | NA       | NA    | NA     | NA       | NA    | NA   | NA       | NA    | NA    | NA       | NA    |
| Triathlon            | 1.01 | 2.75     | 5.46 | 2.17 | 4.32     | 7.56  | 3.69   | 5.91     | 9.47  | 4.62 | 8.09     | 16.10 | 6.40  | 12.71    | 34.56 |
| Volleyball           | 3.15 | 5.50     | 8.31 | 5.16 | 7.64     | 10.67 | 7.28   | 9.61     | 12.69 | 8.66 | 12.08    | 17.89 | 11.11 | 16.79    | 29.33 |
| Wrestling and Judo   | 2.34 | 4.32     | 6.78 | 4.00 | 6.15     | 8.84  | 5.81   | 7.86     | 10.63 | 6.99 | 10.05    | 15.45 | 9.12  | 14.30    | 26.45 |
| <b>Males</b>         |      |          |      |      |          |       |        |          |       |      |          |       |       |          |       |
| Archery and Shooting | NA   | NA       | NA   | NA   | NA       | NA    | NA     | NA       | NA    | NA   | NA       | NA    | NA    | NA       | NA    |
| Athletics            | 1.33 | 2.07     | 2.99 | 1.95 | 2.74     | 3.74  | 2.56   | 3.34     | 4.37  | 2.99 | 4.06     | 5.71  | 3.74  | 5.39     | 8.41  |
| Basketball           | 2.68 | 3.49     | 4.38 | 3.95 | 4.80     | 5.75  | 5.17   | 5.99     | 6.95  | 6.24 | 7.48     | 9.10  | 8.19  | 10.29    | 13.42 |
| Fencing              | NA   | NA       | NA   | NA   | NA       | NA    | NA     | NA       | NA    | NA   | NA       | NA    | NA    | NA       | NA    |
| Gymnastics           | NA   | NA       | NA   | NA   | NA       | NA    | NA     | NA       | NA    | NA   | NA       | NA    | NA    | NA       | NA    |
| Handball             | 2.35 | 3.29     | 4.38 | 3.68 | 4.72     | 5.93  | 5.02   | 6.06     | 7.32  | 6.20 | 7.79     | 10.00 | 8.39  | 11.17    | 15.64 |
| Hockey Rink          | NA   | NA       | NA   | NA   | NA       | NA    | NA     | NA       | NA    | NA   | NA       | NA    | NA    | NA       | NA    |
| Korfball             | NA   | NA       | NA   | NA   | NA       | NA    | NA     | NA       | NA    | NA   | NA       | NA    | NA    | NA       | NA    |
| Modern Pentathlon    | NA   | NA       | NA   | NA   | NA       | NA    | NA     | NA       | NA    | NA   | NA       | NA    | NA    | NA       | NA    |
| Motorsport           | NA   | NA       | NA   | NA   | NA       | NA    | NA     | NA       | NA    | NA   | NA       | NA    | NA    | NA       | NA    |
| Other combat sports  | 1.55 | 2.42     | 3.50 | 2.34 | 3.29     | 4.46  | 3.12   | 4.06     | 5.28  | 3.70 | 5.02     | 7.04  | 4.72  | 6.81     | 10.63 |
| Rowing               | NA   | NA       | NA   | NA   | NA       | NA    | NA     | NA       | NA    | NA   | NA       | NA    | NA    | NA       | NA    |
| Rugby                | 2.49 | 3.70     | 5.17 | 4.30 | 5.75     | 7.50  | 6.28   | 7.82     | 9.72  | 8.14 | 10.62    | 14.20 | 11.81 | 16.51    | 24.49 |
| Sailing              | NA   | NA       | NA   | NA   | NA       | NA    | NA     | NA       | NA    | NA   | NA       | NA    | NA    | NA       | NA    |
| Soccer               | 1.63 | 2.26     | 2.97 | 2.41 | 3.07     | 3.83  | 3.16   | 3.80     | 4.57  | 3.77 | 4.71     | 5.99  | 4.87  | 6.40     | 8.84  |
| Surf                 | NA   | NA       | NA   | NA   | NA       | NA    | NA     | NA       | NA    | NA   | NA       | NA    | NA    | NA       | NA    |
| Swimming             | 1.92 | 2.55     | 3.25 | 2.80 | 3.46     | 4.19  | 3.64   | 4.26     | 5.00  | 4.34 | 5.26     | 6.49  | 5.60  | 7.12     | 9.45  |
| Tennis               | 1.76 | 3.03     | 4.74 | 2.84 | 4.31     | 6.27  | 3.97   | 5.50     | 7.60  | 4.82 | 7.01     | 10.62 | 6.37  | 9.96     | 17.19 |
| Triathlon            | 1.76 | 2.23     | 2.72 | 2.42 | 2.88     | 3.39  | 3.02   | 3.45     | 3.94  | 3.52 | 4.13     | 4.92  | 4.37  | 5.35     | 6.78  |
| Volleyball           | 2.37 | 3.48     | 4.77 | 3.49 | 4.64     | 6.03  | 4.55   | 5.68     | 7.09  | 5.36 | 6.95     | 9.26  | 6.78  | 9.29     | 13.60 |
| Wrestling and Judo   | 1.88 | 2.44     | 3.05 | 2.73 | 3.32     | 3.97  | 3.55   | 4.11     | 4.76  | 4.25 | 5.08     | 6.17  | 5.52  | 6.91     | 8.98  |

NA: data not presented for n &lt; 8.

\* (right arm + left arm + right leg + left leg)



Table 16 – Appendicular \* fat mass (%) percentiles by sport and sex

| Sport                | 0.05  |              |       | 0.25  |              |       | Median |              |       | 0.75  |              |       | 0.95  |              |       |
|----------------------|-------|--------------|-------|-------|--------------|-------|--------|--------------|-------|-------|--------------|-------|-------|--------------|-------|
|                      | Low   | Estimate     | High  | Low   | Estimate     | High  | Low    | Estimate     | High  | Low   | Estimate     | High  | Low   | Estimate     | High  |
| <b>Females</b>       |       |              |       |       |              |       |        |              |       |       |              |       |       |              |       |
| Archery and Shooting | NA    | NA           | NA    | NA    | NA           | NA    | NA     | NA           | NA    | NA    | NA           | NA    | NA    | NA           | NA    |
| Athletics            | 3.44  | <b>12.09</b> | 18.37 | 12.13 | <b>17.95</b> | 22.82 | 18.16  | <b>22.03</b> | 25.91 | 21.25 | <b>26.10</b> | 31.95 | 25.70 | <b>31.97</b> | 40.63 |
| Basketball           | 15.53 | <b>21.49</b> | 26.24 | 23.50 | <b>27.62</b> | 31.24 | 29.04  | <b>31.88</b> | 34.72 | 32.52 | <b>36.14</b> | 40.26 | 37.52 | <b>42.27</b> | 48.23 |
| Fencing              | NA    | NA           | NA    | NA    | NA           | NA    | NA     | NA           | NA    | NA    | NA           | NA    | NA    | NA           | NA    |
| Gymnastics           | 11.89 | <b>21.06</b> | 27.61 | 20.07 | <b>26.34</b> | 31.52 | 25.75  | <b>30.00</b> | 34.25 | 28.47 | <b>33.66</b> | 39.93 | 32.39 | <b>38.94</b> | 48.11 |
| Handball             | NA    | NA           | NA    | NA    | NA           | NA    | NA     | NA           | NA    | NA    | NA           | NA    | NA    | NA           | NA    |
| Hockey Rink          | NA    | NA           | NA    | NA    | NA           | NA    | NA     | NA           | NA    | NA    | NA           | NA    | NA    | NA           | NA    |
| Korfball             | NA    | NA           | NA    | NA    | NA           | NA    | NA     | NA           | NA    | NA    | NA           | NA    | NA    | NA           | NA    |
| Modern Pentathlon    | NA    | NA           | NA    | NA    | NA           | NA    | NA     | NA           | NA    | NA    | NA           | NA    | NA    | NA           | NA    |
| Motorsport           | NA    | NA           | NA    | NA    | NA           | NA    | NA     | NA           | NA    | NA    | NA           | NA    | NA    | NA           | NA    |
| Other combat sports  | NA    | NA           | NA    | NA    | NA           | NA    | NA     | NA           | NA    | NA    | NA           | NA    | NA    | NA           | NA    |
| Rowing               | NA    | NA           | NA    | NA    | NA           | NA    | NA     | NA           | NA    | NA    | NA           | NA    | NA    | NA           | NA    |
| Rugby                | NA    | NA           | NA    | NA    | NA           | NA    | NA     | NA           | NA    | NA    | NA           | NA    | NA    | NA           | NA    |
| Sailing              | NA    | NA           | NA    | NA    | NA           | NA    | NA     | NA           | NA    | NA    | NA           | NA    | NA    | NA           | NA    |
| Soccer               | NA    | NA           | NA    | NA    | NA           | NA    | NA     | NA           | NA    | NA    | NA           | NA    | NA    | NA           | NA    |
| Surf                 | NA    | NA           | NA    | NA    | NA           | NA    | NA     | NA           | NA    | NA    | NA           | NA    | NA    | NA           | NA    |
| Swimming             | 16.28 | <b>21.63</b> | 25.73 | 22.17 | <b>25.87</b> | 29.07 | 26.26  | <b>28.82</b> | 31.39 | 28.58 | <b>31.77</b> | 35.48 | 31.91 | <b>36.01</b> | 41.36 |
| Tennis               | NA    | NA           | NA    | NA    | NA           | NA    | NA     | NA           | NA    | NA    | NA           | NA    | NA    | NA           | NA    |
| Triathlon            | 0.00  | <b>11.59</b> | 20.96 | 9.76  | <b>18.93</b> | 26.23 | 18.16  | <b>24.04</b> | 29.90 | 21.82 | <b>29.14</b> | 38.30 | 27.10 | <b>36.48</b> | 50.38 |
| Volleyball           | 12.41 | <b>20.98</b> | 27.25 | 20.86 | <b>26.72</b> | 31.63 | 26.74  | <b>30.72</b> | 34.68 | 29.78 | <b>34.71</b> | 40.55 | 34.16 | <b>40.46</b> | 49.00 |
| Wrestling and Judo   | 5.97  | <b>17.20</b> | 25.32 | 16.95 | <b>24.54</b> | 30.86 | 24.58  | <b>29.65</b> | 34.72 | 28.44 | <b>34.76</b> | 42.35 | 33.98 | <b>42.11</b> | 53.33 |
| <b>Males</b>         |       |              |       |       |              |       |        |              |       |       |              |       |       |              |       |
| Archery and Shooting | NA    | NA           | NA    | NA    | NA           | NA    | NA     | NA           | NA    | NA    | NA           | NA    | NA    | NA           | NA    |
| Athletics            | 0.00  | <b>4.46</b>  | 9.03  | 3.79  | <b>8.18</b>  | 11.74 | 7.89   | <b>10.76</b> | 13.63 | 9.78  | <b>13.34</b> | 17.73 | 12.49 | <b>17.05</b> | 23.64 |
| Basketball           | 5.84  | <b>9.25</b>  | 12.02 | 11.04 | <b>13.37</b> | 15.45 | 14.65  | <b>16.24</b> | 17.84 | 17.03 | <b>19.11</b> | 21.45 | 20.46 | <b>23.24</b> | 26.65 |
| Fencing              | NA    | NA           | NA    | NA    | NA           | NA    | NA     | NA           | NA    | NA    | NA           | NA    | NA    | NA           | NA    |
| Gymnastics           | NA    | NA           | NA    | NA    | NA           | NA    | NA     | NA           | NA    | NA    | NA           | NA    | NA    | NA           | NA    |
| Handball             | 3.05  | <b>7.91</b>  | 11.76 | 9.78  | <b>13.08</b> | 15.97 | 14.46  | <b>16.68</b> | 18.90 | 17.39 | <b>20.28</b> | 23.58 | 21.61 | <b>25.45</b> | 30.31 |
| Hockey Rink          | NA    | NA           | NA    | NA    | NA           | NA    | NA     | NA           | NA    | NA    | NA           | NA    | NA    | NA           | NA    |
| Korfball             | NA    | NA           | NA    | NA    | NA           | NA    | NA     | NA           | NA    | NA    | NA           | NA    | NA    | NA           | NA    |
| Modern Pentathlon    | NA    | NA           | NA    | NA    | NA           | NA    | NA     | NA           | NA    | NA    | NA           | NA    | NA    | NA           | NA    |
| Motorsport           | NA    | NA           | NA    | NA    | NA           | NA    | NA     | NA           | NA    | NA    | NA           | NA    | NA    | NA           | NA    |
| Other combat sports  | 1.29  | <b>7.36</b>  | 11.69 | 7.00  | <b>11.09</b> | 14.47 | 10.96  | <b>13.68</b> | 16.40 | 12.89 | <b>16.27</b> | 20.36 | 15.67 | <b>20.00</b> | 26.07 |
| Rowing               | NA    | NA           | NA    | NA    | NA           | NA    | NA     | NA           | NA    | NA    | NA           | NA    | NA    | NA           | NA    |
| Rugby                | 3.46  | <b>9.32</b>  | 14.01 | 11.88 | <b>15.86</b> | 19.36 | 17.73  | <b>20.40</b> | 23.08 | 21.45 | <b>24.94</b> | 28.94 | 26.80 | <b>31.48</b> | 37.36 |
| Sailing              | NA    | NA           | NA    | NA    | NA           | NA    | NA     | NA           | NA    | NA    | NA           | NA    | NA    | NA           | NA    |
| Soccer               | 2.13  | <b>5.98</b>  | 8.96  | 6.95  | <b>9.56</b>  | 11.82 | 10.30  | <b>12.05</b> | 13.80 | 12.28 | <b>14.53</b> | 17.15 | 15.14 | <b>18.11</b> | 21.97 |
| Surf                 | NA    | NA           | NA    | NA    | NA           | NA    | NA     | NA           | NA    | NA    | NA           | NA    | NA    | NA           | NA    |
| Swimming             | 4.00  | <b>7.53</b>  | 10.34 | 8.87  | <b>11.28</b> | 13.39 | 12.25  | <b>13.88</b> | 15.52 | 14.38 | <b>16.49</b> | 18.90 | 17.43 | <b>20.23</b> | 23.76 |
| Tennis               | 0.72  | <b>9.49</b>  | 15.63 | 8.52  | <b>14.42</b> | 19.26 | 13.94  | <b>17.86</b> | 21.78 | 16.46 | <b>21.29</b> | 27.20 | 20.08 | <b>26.23</b> | 35.00 |
| Triathlon            | 4.00  | <b>6.83</b>  | 9.10  | 7.98  | <b>9.93</b>  | 11.64 | 10.75  | <b>12.08</b> | 13.40 | 12.51 | <b>14.23</b> | 16.17 | 15.05 | <b>17.32</b> | 20.15 |
| Volleyball           | 2.43  | <b>7.84</b>  | 11.83 | 8.01  | <b>11.68</b> | 14.76 | 11.89  | <b>14.35</b> | 16.80 | 13.93 | <b>17.01</b> | 20.68 | 16.86 | <b>20.85</b> | 26.27 |
| Wrestling and Judo   | 3.71  | <b>6.90</b>  | 9.47  | 8.54  | <b>10.71</b> | 12.64 | 11.89  | <b>13.36</b> | 14.84 | 14.09 | <b>16.01</b> | 18.19 | 17.25 | <b>19.83</b> | 23.01 |

NA: data not presented for n &lt; 8.

\* (right arm + left arm + right leg + left leg)

Table 17 – Appendicular \* fat-free mass (kg) percentiles by sport and sex

| Sport                | 0.05  |              |       | 0.25  |              |       | Median |              |       | 0.75  |              |       | 0.95  |              |       |
|----------------------|-------|--------------|-------|-------|--------------|-------|--------|--------------|-------|-------|--------------|-------|-------|--------------|-------|
|                      | Low   | Estimate     | High  | Low   | Estimate     | High  | Low    | Estimate     | High  | Low   | Estimate     | High  | Low   | Estimate     | High  |
| <b>Females</b>       |       |              |       |       |              |       |        |              |       |       |              |       |       |              |       |
| Archery and Shooting | NA    | NA           | NA    | NA    | NA           | NA    | NA     | NA           | NA    | NA    | NA           | NA    | NA    | NA           | NA    |
| Athletics            | 14.62 | <b>18.40</b> | 21.47 | 18.62 | <b>21.40</b> | 23.88 | 21.41  | <b>23.48</b> | 25.55 | 23.08 | <b>25.56</b> | 28.34 | 25.49 | <b>28.56</b> | 32.34 |
| Basketball           | 14.70 | <b>17.06</b> | 19.03 | 17.97 | <b>19.68</b> | 21.23 | 20.25  | <b>21.51</b> | 22.76 | 21.78 | <b>23.33</b> | 25.04 | 23.98 | <b>25.95</b> | 28.31 |
| Fencing              | NA    | NA           | NA    | NA    | NA           | NA    | NA     | NA           | NA    | NA    | NA           | NA    | NA    | NA           | NA    |
| Gymnastics           | 9.91  | <b>13.26</b> | 15.99 | 13.17 | <b>15.65</b> | 17.88 | 15.44  | <b>17.31</b> | 19.20 | 16.75 | <b>18.97</b> | 21.47 | 18.65 | <b>21.36</b> | 24.73 |
| Handball             | NA    | NA           | NA    | NA    | NA           | NA    | NA     | NA           | NA    | NA    | NA           | NA    | NA    | NA           | NA    |
| Hockey Rink          | NA    | NA           | NA    | NA    | NA           | NA    | NA     | NA           | NA    | NA    | NA           | NA    | NA    | NA           | NA    |
| Korfball             | NA    | NA           | NA    | NA    | NA           | NA    | NA     | NA           | NA    | NA    | NA           | NA    | NA    | NA           | NA    |
| Modern Pentathlon    | NA    | NA           | NA    | NA    | NA           | NA    | NA     | NA           | NA    | NA    | NA           | NA    | NA    | NA           | NA    |
| Motorsport           | NA    | NA           | NA    | NA    | NA           | NA    | NA     | NA           | NA    | NA    | NA           | NA    | NA    | NA           | NA    |
| Other combat sports  | NA    | NA           | NA    | NA    | NA           | NA    | NA     | NA           | NA    | NA    | NA           | NA    | NA    | NA           | NA    |
| Rowing               | NA    | NA           | NA    | NA    | NA           | NA    | NA     | NA           | NA    | NA    | NA           | NA    | NA    | NA           | NA    |
| Rugby                | NA    | NA           | NA    | NA    | NA           | NA    | NA     | NA           | NA    | NA    | NA           | NA    | NA    | NA           | NA    |
| Sailing              | NA    | NA           | NA    | NA    | NA           | NA    | NA     | NA           | NA    | NA    | NA           | NA    | NA    | NA           | NA    |
| Soccer               | NA    | NA           | NA    | NA    | NA           | NA    | NA     | NA           | NA    | NA    | NA           | NA    | NA    | NA           | NA    |
| Surf                 | NA    | NA           | NA    | NA    | NA           | NA    | NA     | NA           | NA    | NA    | NA           | NA    | NA    | NA           | NA    |
| Swimming             | 13.10 | <b>15.74</b> | 17.91 | 16.20 | <b>18.13</b> | 19.86 | 18.36  | <b>19.79</b> | 21.22 | 19.71 | <b>21.44</b> | 23.37 | 21.66 | <b>23.83</b> | 26.47 |
| Tennis               | NA    | NA           | NA    | NA    | NA           | NA    | NA     | NA           | NA    | NA    | NA           | NA    | NA    | NA           | NA    |
| Triathlon            | 12.26 | <b>15.80</b> | 18.67 | 15.47 | <b>18.12</b> | 20.49 | 17.70  | <b>19.73</b> | 21.77 | 18.97 | <b>21.35</b> | 24.00 | 20.80 | <b>23.67</b> | 27.21 |
| Volleyball           | 12.89 | <b>16.82</b> | 20.02 | 17.08 | <b>19.96</b> | 22.54 | 19.99  | <b>22.14</b> | 24.29 | 21.74 | <b>24.32</b> | 27.20 | 24.26 | <b>27.46</b> | 31.39 |
| Wrestling and Judo   | 10.51 | <b>14.29</b> | 17.36 | 14.47 | <b>17.24</b> | 19.72 | 17.23  | <b>19.30</b> | 21.36 | 18.87 | <b>21.35</b> | 24.12 | 21.23 | <b>24.30</b> | 28.09 |
| <b>Males</b>         |       |              |       |       |              |       |        |              |       |       |              |       |       |              |       |
| Archery and Shooting | NA    | NA           | NA    | NA    | NA           | NA    | NA     | NA           | NA    | NA    | NA           | NA    | NA    | NA           | NA    |
| Athletics            | 21.01 | <b>25.94</b> | 29.78 | 25.39 | <b>28.98</b> | 32.13 | 28.44  | <b>31.10</b> | 33.76 | 30.07 | <b>33.22</b> | 36.81 | 32.42 | <b>36.26</b> | 41.19 |
| Basketball           | 22.64 | <b>25.94</b> | 28.71 | 27.63 | <b>29.98</b> | 32.11 | 31.09  | <b>32.78</b> | 34.48 | 33.46 | <b>35.59</b> | 37.94 | 36.86 | <b>39.63</b> | 42.93 |
| Fencing              | NA    | NA           | NA    | NA    | NA           | NA    | NA     | NA           | NA    | NA    | NA           | NA    | NA    | NA           | NA    |
| Gymnastics           | NA    | NA           | NA    | NA    | NA           | NA    | NA     | NA           | NA    | NA    | NA           | NA    | NA    | NA           | NA    |
| Handball             | 22.43 | <b>26.11</b> | 29.15 | 27.47 | <b>30.09</b> | 32.46 | 30.97  | <b>32.86</b> | 34.75 | 33.26 | <b>35.63</b> | 38.25 | 36.57 | <b>39.61</b> | 43.29 |
| Hockey Rink          | NA    | NA           | NA    | NA    | NA           | NA    | NA     | NA           | NA    | NA    | NA           | NA    | NA    | NA           | NA    |
| Korfball             | NA    | NA           | NA    | NA    | NA           | NA    | NA     | NA           | NA    | NA    | NA           | NA    | NA    | NA           | NA    |
| Modern Pentathlon    | NA    | NA           | NA    | NA    | NA           | NA    | NA     | NA           | NA    | NA    | NA           | NA    | NA    | NA           | NA    |
| Motorsport           | NA    | NA           | NA    | NA    | NA           | NA    | NA     | NA           | NA    | NA    | NA           | NA    | NA    | NA           | NA    |
| Other combat sports  | 17.19 | <b>22.41</b> | 26.47 | 22.15 | <b>25.91</b> | 29.19 | 25.59  | <b>28.34</b> | 31.08 | 27.48 | <b>30.77</b> | 34.53 | 30.20 | <b>34.27</b> | 39.49 |
| Rowing               | NA    | NA           | NA    | NA    | NA           | NA    | NA     | NA           | NA    | NA    | NA           | NA    | NA    | NA           | NA    |
| Rugby                | 22.18 | <b>25.96</b> | 29.09 | 27.53 | <b>30.21</b> | 32.64 | 31.24  | <b>33.17</b> | 35.11 | 33.71 | <b>36.13</b> | 38.82 | 37.26 | <b>40.39</b> | 44.16 |
| Sailing              | NA    | NA           | NA    | NA    | NA           | NA    | NA     | NA           | NA    | NA    | NA           | NA    | NA    | NA           | NA    |
| Soccer               | 21.77 | <b>24.87</b> | 27.40 | 25.58 | <b>27.81</b> | 29.80 | 28.23  | <b>29.85</b> | 31.47 | 29.90 | <b>31.89</b> | 34.12 | 32.30 | <b>34.82</b> | 37.93 |
| Surf                 | NA    | NA           | NA    | NA    | NA           | NA    | NA     | NA           | NA    | NA    | NA           | NA    | NA    | NA           | NA    |
| Swimming             | 19.13 | <b>22.33</b> | 24.97 | 23.51 | <b>25.79</b> | 27.85 | 26.56  | <b>28.20</b> | 29.85 | 28.56 | <b>30.61</b> | 32.89 | 31.44 | <b>34.08</b> | 37.28 |
| Tennis               | 15.77 | <b>22.03</b> | 26.87 | 21.45 | <b>25.96</b> | 29.89 | 25.40  | <b>28.70</b> | 31.99 | 27.50 | <b>31.43</b> | 35.94 | 30.52 | <b>35.36</b> | 41.62 |
| Triathlon            | 19.38 | <b>21.87</b> | 23.95 | 22.84 | <b>24.63</b> | 26.24 | 25.24  | <b>26.54</b> | 27.84 | 26.83 | <b>28.45</b> | 30.24 | 29.13 | <b>31.20</b> | 33.70 |
| Volleyball           | 25.78 | <b>30.70</b> | 34.59 | 30.83 | <b>34.38</b> | 37.51 | 34.35  | <b>36.94</b> | 39.54 | 36.37 | <b>39.50</b> | 43.05 | 39.29 | <b>43.19</b> | 48.11 |
| Wrestling and Judo   | 19.07 | <b>22.10</b> | 24.64 | 23.61 | <b>25.77</b> | 27.73 | 26.76  | <b>28.32</b> | 29.87 | 28.90 | <b>30.86</b> | 33.03 | 31.99 | <b>34.53</b> | 37.56 |

NA: data not presented for n &lt; 8.

\* (right arm + left arm + right leg + left leg)

Table 18 – Appendicular \* lean soft tissue (kg) percentiles by sport and sex

| Sport                | 0.05  |          |       | 0.25  |          |       | Median |          |       | 0.75  |          |       | 0.95  |          |       |
|----------------------|-------|----------|-------|-------|----------|-------|--------|----------|-------|-------|----------|-------|-------|----------|-------|
|                      | Low   | Estimate | High  | Low   | Estimate | High  | Low    | Estimate | High  | Low   | Estimate | High  | Low   | Estimate | High  |
| <b>Females</b>       |       |          |       |       |          |       |        |          |       |       |          |       |       |          |       |
| Archery and Shooting | NA    | NA       | NA    | NA    | NA       | NA    | NA     | NA       | NA    | NA    | NA       | NA    | NA    | NA       | NA    |
| Athletics            | 14.01 | 17.46    | 20.31 | 17.72 | 20.27    | 22.58 | 20.29  | 22.23    | 24.16 | 21.87 | 24.18    | 26.73 | 24.15 | 26.99    | 30.44 |
| Basketball           | 13.77 | 15.97    | 17.81 | 16.85 | 18.45    | 19.90 | 19.00  | 20.17    | 21.35 | 20.45 | 21.90    | 23.49 | 22.53 | 24.38    | 26.57 |
| Fencing              | NA    | NA       | NA    | NA    | NA       | NA    | NA     | NA       | NA    | NA    | NA       | NA    | NA    | NA       | NA    |
| Gymnastics           | 9.31  | 12.45    | 15.03 | 12.41 | 14.75    | 16.86 | 14.56  | 16.34    | 18.14 | 15.84 | 17.94    | 20.29 | 17.67 | 20.24    | 23.39 |
| Handball             | NA    | NA       | NA    | NA    | NA       | NA    | NA     | NA       | NA    | NA    | NA       | NA    | NA    | NA       | NA    |
| Hockey Rink          | NA    | NA       | NA    | NA    | NA       | NA    | NA     | NA       | NA    | NA    | NA       | NA    | NA    | NA       | NA    |
| Korfball             | NA    | NA       | NA    | NA    | NA       | NA    | NA     | NA       | NA    | NA    | NA       | NA    | NA    | NA       | NA    |
| Modern Pentathlon    | NA    | NA       | NA    | NA    | NA       | NA    | NA     | NA       | NA    | NA    | NA       | NA    | NA    | NA       | NA    |
| Motorsport           | NA    | NA       | NA    | NA    | NA       | NA    | NA     | NA       | NA    | NA    | NA       | NA    | NA    | NA       | NA    |
| Other combat sports  | NA    | NA       | NA    | NA    | NA       | NA    | NA     | NA       | NA    | NA    | NA       | NA    | NA    | NA       | NA    |
| Rowing               | NA    | NA       | NA    | NA    | NA       | NA    | NA     | NA       | NA    | NA    | NA       | NA    | NA    | NA       | NA    |
| Rugby                | NA    | NA       | NA    | NA    | NA       | NA    | NA     | NA       | NA    | NA    | NA       | NA    | NA    | NA       | NA    |
| Sailing              | NA    | NA       | NA    | NA    | NA       | NA    | NA     | NA       | NA    | NA    | NA       | NA    | NA    | NA       | NA    |
| Soccer               | NA    | NA       | NA    | NA    | NA       | NA    | NA     | NA       | NA    | NA    | NA       | NA    | NA    | NA       | NA    |
| Surf                 | NA    | NA       | NA    | NA    | NA       | NA    | NA     | NA       | NA    | NA    | NA       | NA    | NA    | NA       | NA    |
| Swimming             | 12.44 | 14.91    | 16.97 | 15.39 | 17.21    | 18.85 | 17.44  | 18.80    | 20.16 | 18.75 | 20.39    | 22.21 | 20.63 | 22.69    | 25.17 |
| Tennis               | NA    | NA       | NA    | NA    | NA       | NA    | NA     | NA       | NA    | NA    | NA       | NA    | NA    | NA       | NA    |
| Triathlon            | 11.68 | 14.99    | 17.71 | 14.73 | 17.23    | 19.49 | 16.86  | 18.79    | 20.72 | 18.09 | 20.35    | 22.85 | 19.87 | 22.59    | 25.90 |
| Volleyball           | 12.30 | 15.90    | 18.86 | 16.19 | 18.85    | 21.24 | 18.90  | 20.90    | 22.89 | 20.55 | 22.94    | 25.60 | 22.93 | 25.89    | 29.50 |
| Wrestling and Judo   | 9.92  | 13.42    | 16.27 | 13.63 | 16.21    | 18.52 | 16.22  | 18.16    | 20.09 | 17.78 | 20.10    | 22.67 | 20.03 | 22.90    | 26.38 |
| <b>Males</b>         |       |          |       |       |          |       |        |          |       |       |          |       |       |          |       |
| Archery and Shooting | NA    | NA       | NA    | NA    | NA       | NA    | NA     | NA       | NA    | NA    | NA       | NA    | NA    | NA       | NA    |
| Athletics            | 19.88 | 24.57    | 28.21 | 24.04 | 27.45    | 30.43 | 26.93  | 29.46    | 31.98 | 28.48 | 31.46    | 34.87 | 30.70 | 34.34    | 39.03 |
| Basketball           | 21.40 | 24.52    | 27.14 | 26.11 | 28.33    | 30.35 | 29.38  | 30.98    | 32.58 | 31.61 | 33.63    | 35.85 | 34.83 | 37.44    | 40.56 |
| Fencing              | NA    | NA       | NA    | NA    | NA       | NA    | NA     | NA       | NA    | NA    | NA       | NA    | NA    | NA       | NA    |
| Gymnastics           | NA    | NA       | NA    | NA    | NA       | NA    | NA     | NA       | NA    | NA    | NA       | NA    | NA    | NA       | NA    |
| Handball             | 21.21 | 24.69    | 27.57 | 25.97 | 28.45    | 30.69 | 29.28  | 31.07    | 32.86 | 31.45 | 33.68    | 36.17 | 34.57 | 37.44    | 40.93 |
| Hockey Rink          | NA    | NA       | NA    | NA    | NA       | NA    | NA     | NA       | NA    | NA    | NA       | NA    | NA    | NA       | NA    |
| Korfball             | NA    | NA       | NA    | NA    | NA       | NA    | NA     | NA       | NA    | NA    | NA       | NA    | NA    | NA       | NA    |
| Modern Pentathlon    | NA    | NA       | NA    | NA    | NA       | NA    | NA     | NA       | NA    | NA    | NA       | NA    | NA    | NA       | NA    |
| Motorsport           | NA    | NA       | NA    | NA    | NA       | NA    | NA     | NA       | NA    | NA    | NA       | NA    | NA    | NA       | NA    |
| Other combat sports  | 16.37 | 21.29    | 25.11 | 21.03 | 24.57    | 27.66 | 24.26  | 26.85    | 29.43 | 26.04 | 29.13    | 32.67 | 28.59 | 32.41    | 37.33 |
| Rowing               | NA    | NA       | NA    | NA    | NA       | NA    | NA     | NA       | NA    | NA    | NA       | NA    | NA    | NA       | NA    |
| Rugby                | 20.80 | 24.42    | 27.42 | 25.92 | 28.50    | 30.81 | 29.48  | 31.33    | 33.18 | 31.84 | 34.16    | 36.73 | 35.24 | 38.24    | 41.85 |
| Sailing              | NA    | NA       | NA    | NA    | NA       | NA    | NA     | NA       | NA    | NA    | NA       | NA    | NA    | NA       | NA    |
| Soccer               | 20.62 | 23.56    | 25.95 | 24.23 | 26.34    | 28.23 | 26.74  | 28.27    | 29.81 | 28.32 | 30.21    | 32.32 | 30.59 | 32.99    | 35.93 |
| Surf                 | NA    | NA       | NA    | NA    | NA       | NA    | NA     | NA       | NA    | NA    | NA       | NA    | NA    | NA       | NA    |
| Swimming             | 18.28 | 21.30    | 23.79 | 22.42 | 24.57    | 26.50 | 25.29  | 26.84    | 28.39 | 27.18 | 29.11    | 31.26 | 29.89 | 32.38    | 35.40 |
| Tennis               | 14.86 | 20.89    | 25.52 | 20.31 | 24.65    | 28.41 | 24.10  | 27.27    | 30.42 | 26.10 | 29.88    | 34.21 | 28.99 | 33.64    | 39.66 |
| Triathlon            | 18.46 | 20.84    | 22.81 | 21.74 | 23.44    | 24.98 | 24.01  | 25.25    | 26.48 | 25.52 | 27.06    | 28.76 | 27.69 | 29.66    | 32.03 |
| Volleyball           | 24.28 | 28.96    | 32.66 | 29.07 | 32.44    | 35.42 | 32.39  | 34.87    | 37.34 | 34.31 | 37.29    | 40.66 | 37.07 | 40.77    | 45.45 |
| Wrestling and Judo   | 17.96 | 20.84    | 23.25 | 22.29 | 24.34    | 26.19 | 25.30  | 26.77    | 28.24 | 27.34 | 29.20    | 31.25 | 30.28 | 32.69    | 35.57 |

NA: data not presented for n &lt; 8.

\* (right arm + left arm + right leg + left leg)

Table 19 – Appendicular \* lean soft tissue index (kg/m<sup>2</sup>) percentiles by sport and sex

| Sport                | 0.05 |          |      | 0.25 |          |      | Median |          |       | 0.75 |          |       | 0.95  |          |       |
|----------------------|------|----------|------|------|----------|------|--------|----------|-------|------|----------|-------|-------|----------|-------|
|                      | Low  | Estimate | High | Low  | Estimate | High | Low    | Estimate | High  | Low  | Estimate | High  | Low   | Estimate | High  |
| <b>Females</b>       |      |          |      |      |          |      |        |          |       |      |          |       |       |          |       |
| Archery and Shooting | NA   | NA       | NA   | NA   | NA       | NA   | NA     | NA       | NA    | NA   | NA       | NA    | NA    | NA       | NA    |
| Athletics            | 5.32 | 6.25     | 7.13 | 6.25 | 7.05     | 7.85 | 6.99   | 7.66     | 8.39  | 7.47 | 8.33     | 9.39  | 8.23  | 9.39     | 11.03 |
| Basketball           | 4.91 | 5.44     | 5.94 | 5.62 | 6.06     | 6.49 | 6.17   | 6.53     | 6.91  | 6.57 | 7.04     | 7.59  | 7.19  | 7.84     | 8.69  |
| Fencing              | NA   | NA       | NA   | NA   | NA       | NA   | NA     | NA       | NA    | NA   | NA       | NA    | NA    | NA       | NA    |
| Gymnastics           | 4.50 | 5.21     | 5.87 | 5.14 | 5.74     | 6.34 | 5.64   | 6.14     | 6.69  | 5.95 | 6.58     | 7.34  | 6.43  | 7.25     | 8.40  |
| Handball             | NA   | NA       | NA   | NA   | NA       | NA   | NA     | NA       | NA    | NA   | NA       | NA    | NA    | NA       | NA    |
| Hockey Rink          | NA   | NA       | NA   | NA   | NA       | NA   | NA     | NA       | NA    | NA   | NA       | NA    | NA    | NA       | NA    |
| Korfball             | NA   | NA       | NA   | NA   | NA       | NA   | NA     | NA       | NA    | NA   | NA       | NA    | NA    | NA       | NA    |
| Modern Pentathlon    | NA   | NA       | NA   | NA   | NA       | NA   | NA     | NA       | NA    | NA   | NA       | NA    | NA    | NA       | NA    |
| Motorsport           | NA   | NA       | NA   | NA   | NA       | NA   | NA     | NA       | NA    | NA   | NA       | NA    | NA    | NA       | NA    |
| Other combat sports  | NA   | NA       | NA   | NA   | NA       | NA   | NA     | NA       | NA    | NA   | NA       | NA    | NA    | NA       | NA    |
| Rowing               | NA   | NA       | NA   | NA   | NA       | NA   | NA     | NA       | NA    | NA   | NA       | NA    | NA    | NA       | NA    |
| Rugby                | NA   | NA       | NA   | NA   | NA       | NA   | NA     | NA       | NA    | NA   | NA       | NA    | NA    | NA       | NA    |
| Sailing              | NA   | NA       | NA   | NA   | NA       | NA   | NA     | NA       | NA    | NA   | NA       | NA    | NA    | NA       | NA    |
| Soccer               | NA   | NA       | NA   | NA   | NA       | NA   | NA     | NA       | NA    | NA   | NA       | NA    | NA    | NA       | NA    |
| Surf                 | NA   | NA       | NA   | NA   | NA       | NA   | NA     | NA       | NA    | NA   | NA       | NA    | NA    | NA       | NA    |
| Swimming             | 5.11 | 5.69     | 6.22 | 5.75 | 6.23     | 6.71 | 6.25   | 6.64     | 7.06  | 6.58 | 7.08     | 7.67  | 7.09  | 7.75     | 8.64  |
| Tennis               | NA   | NA       | NA   | NA   | NA       | NA   | NA     | NA       | NA    | NA   | NA       | NA    | NA    | NA       | NA    |
| Triathlon            | 4.54 | 5.43     | 6.28 | 5.30 | 6.07     | 6.85 | 5.90   | 6.55     | 7.28  | 6.27 | 7.08     | 8.10  | 6.84  | 7.91     | 9.46  |
| Volleyball           | 4.77 | 5.54     | 6.26 | 5.55 | 6.20     | 6.85 | 6.16   | 6.70     | 7.29  | 6.56 | 7.24     | 8.09  | 7.17  | 8.10     | 9.40  |
| Wrestling and Judo   | 4.48 | 5.34     | 6.16 | 5.33 | 6.07     | 6.82 | 6.01   | 6.64     | 7.33  | 6.46 | 7.26     | 8.26  | 7.15  | 8.25     | 9.83  |
| <b>Males</b>         |      |          |      |      |          |      |        |          |       |      |          |       |       |          |       |
| Archery and Shooting | NA   | NA       | NA   | NA   | NA       | NA   | NA     | NA       | NA    | NA   | NA       | NA    | NA    | NA       | NA    |
| Athletics            | 6.22 | 7.43     | 8.65 | 7.34 | 8.44     | 9.59 | 8.24   | 9.21     | 10.30 | 8.85 | 10.06    | 11.56 | 9.82  | 11.42    | 13.64 |
| Basketball           | 6.47 | 7.07     | 7.64 | 7.40 | 7.91     | 8.42 | 8.13   | 8.56     | 9.00  | 8.70 | 9.25     | 9.89  | 9.59  | 10.36    | 11.32 |
| Fencing              | NA   | NA       | NA   | NA   | NA       | NA   | NA     | NA       | NA    | NA   | NA       | NA    | NA    | NA       | NA    |
| Gymnastics           | NA   | NA       | NA   | NA   | NA       | NA   | NA     | NA       | NA    | NA   | NA       | NA    | NA    | NA       | NA    |
| Handball             | 6.97 | 7.70     | 8.38 | 7.99 | 8.61     | 9.23 | 8.79   | 9.31     | 9.86  | 9.40 | 10.07    | 10.85 | 10.35 | 11.27    | 12.44 |
| Hockey Rink          | NA   | NA       | NA   | NA   | NA       | NA   | NA     | NA       | NA    | NA   | NA       | NA    | NA    | NA       | NA    |
| Korfball             | NA   | NA       | NA   | NA   | NA       | NA   | NA     | NA       | NA    | NA   | NA       | NA    | NA    | NA       | NA    |
| Modern Pentathlon    | NA   | NA       | NA   | NA   | NA       | NA   | NA     | NA       | NA    | NA   | NA       | NA    | NA    | NA       | NA    |
| Motorsport           | NA   | NA       | NA   | NA   | NA       | NA   | NA     | NA       | NA    | NA   | NA       | NA    | NA    | NA       | NA    |
| Other combat sports  | 5.94 | 7.04     | 8.13 | 7.02 | 8.00     | 9.03 | 7.88   | 8.75     | 9.72  | 8.48 | 9.57     | 10.91 | 9.42  | 10.88    | 12.89 |
| Rowing               | NA   | NA       | NA   | NA   | NA       | NA   | NA     | NA       | NA    | NA   | NA       | NA    | NA    | NA       | NA    |
| Rugby                | 6.94 | 7.72     | 8.47 | 8.09 | 8.76     | 9.43 | 9.00   | 9.57     | 10.17 | 9.70 | 10.45    | 11.31 | 10.81 | 11.86    | 13.19 |
| Sailing              | NA   | NA       | NA   | NA   | NA       | NA   | NA     | NA       | NA    | NA   | NA       | NA    | NA    | NA       | NA    |
| Soccer               | 6.85 | 7.64     | 8.40 | 7.86 | 8.54     | 9.22 | 8.65   | 9.23     | 9.84  | 9.24 | 9.97     | 10.83 | 10.14 | 11.15    | 12.43 |
| Surf                 | NA   | NA       | NA   | NA   | NA       | NA   | NA     | NA       | NA    | NA   | NA       | NA    | NA    | NA       | NA    |
| Swimming             | 6.27 | 6.93     | 7.56 | 7.21 | 7.78     | 8.33 | 7.95   | 8.42     | 8.92  | 8.51 | 9.12     | 9.83  | 9.38  | 10.22    | 11.30 |
| Tennis               | 5.93 | 7.13     | 8.34 | 7.05 | 8.14     | 9.30 | 7.95   | 8.93     | 10.02 | 8.57 | 9.79     | 11.30 | 9.55  | 11.18    | 13.44 |
| Triathlon            | 6.16 | 6.79     | 7.37 | 7.06 | 7.59     | 8.11 | 7.76   | 8.20     | 8.67  | 8.29 | 8.86     | 9.52  | 9.12  | 9.91     | 10.91 |
| Volleyball           | 6.76 | 7.76     | 8.73 | 7.83 | 8.71     | 9.61 | 8.67   | 9.44     | 10.27 | 9.27 | 10.23    | 11.38 | 10.20 | 11.48    | 13.19 |
| Wrestling and Judo   | 6.68 | 7.36     | 8.00 | 7.73 | 8.31     | 8.88 | 8.55   | 9.04     | 9.55  | 9.19 | 9.83     | 10.56 | 10.20 | 11.10    | 12.22 |

NA: data not presented for n &lt; 8.

\* (right arm + left arm + right leg + left leg)

Table 20 – Trunk bone mineral content (g) percentiles by sport and sex

| Sport                | 0.05 |          |      | 0.25 |          |      | Median |          |      | 0.75 |          |      | 0.95 |          |      |
|----------------------|------|----------|------|------|----------|------|--------|----------|------|------|----------|------|------|----------|------|
|                      | Low  | Estimate | High | Low  | Estimate | High | Low    | Estimate | High | Low  | Estimate | High | Low  | Estimate | High |
| <b>Females</b>       |      |          |      |      |          |      |        |          |      |      |          |      |      |          |      |
| Archery and Shooting | NA   | NA       | NA   | NA   | NA       | NA   | NA     | NA       | NA   | NA   | NA       | NA   | NA   | NA       | NA   |
| Athletics            | 190  | 395      | 554  | 407  | 551      | 676  | 557    | 659      | 761  | 642  | 767      | 911  | 764  | 923      | 1128 |
| Basketball           | 267  | 426      | 555  | 490  | 600      | 699  | 644    | 721      | 799  | 744  | 843      | 953  | 888  | 1017     | 1176 |
| Fencing              | NA   | NA       | NA   | NA   | NA       | NA   | NA     | NA       | NA   | NA   | NA       | NA   | NA   | NA       | NA   |
| Gymnastics           | 89   | 301      | 463  | 294  | 443      | 572  | 437    | 542      | 648  | 513  | 641      | 790  | 622  | 783      | 995  |
| Handball             | NA   | NA       | NA   | NA   | NA       | NA   | NA     | NA       | NA   | NA   | NA       | NA   | NA   | NA       | NA   |
| Hockey Rink          | NA   | NA       | NA   | NA   | NA       | NA   | NA     | NA       | NA   | NA   | NA       | NA   | NA   | NA       | NA   |
| Korfball             | NA   | NA       | NA   | NA   | NA       | NA   | NA     | NA       | NA   | NA   | NA       | NA   | NA   | NA       | NA   |
| Modern Pentathlon    | NA   | NA       | NA   | NA   | NA       | NA   | NA     | NA       | NA   | NA   | NA       | NA   | NA   | NA       | NA   |
| Motorsport           | NA   | NA       | NA   | NA   | NA       | NA   | NA     | NA       | NA   | NA   | NA       | NA   | NA   | NA       | NA   |
| Other combat sports  | NA   | NA       | NA   | NA   | NA       | NA   | NA     | NA       | NA   | NA   | NA       | NA   | NA   | NA       | NA   |
| Rowing               | NA   | NA       | NA   | NA   | NA       | NA   | NA     | NA       | NA   | NA   | NA       | NA   | NA   | NA       | NA   |
| Rugby                | NA   | NA       | NA   | NA   | NA       | NA   | NA     | NA       | NA   | NA   | NA       | NA   | NA   | NA       | NA   |
| Sailing              | NA   | NA       | NA   | NA   | NA       | NA   | NA     | NA       | NA   | NA   | NA       | NA   | NA   | NA       | NA   |
| Soccer               | NA   | NA       | NA   | NA   | NA       | NA   | NA     | NA       | NA   | NA   | NA       | NA   | NA   | NA       | NA   |
| Surf                 | NA   | NA       | NA   | NA   | NA       | NA   | NA     | NA       | NA   | NA   | NA       | NA   | NA   | NA       | NA   |
| Swimming             | 236  | 372      | 480  | 395  | 491      | 575  | 506    | 574      | 642  | 573  | 657      | 752  | 668  | 776      | 912  |
| Tennis               | NA   | NA       | NA   | NA   | NA       | NA   | NA     | NA       | NA   | NA   | NA       | NA   | NA   | NA       | NA   |
| Triathlon            | 53   | 244      | 389  | 228  | 363      | 479  | 349    | 445      | 541  | 412  | 528      | 663  | 502  | 647      | 838  |
| Volleyball           | 218  | 416      | 569  | 426  | 566      | 687  | 571    | 670      | 768  | 653  | 774      | 913  | 770  | 924      | 1122 |
| Wrestling and Judo   | 178  | 389      | 551  | 396  | 544      | 672  | 548    | 652      | 757  | 632  | 760      | 908  | 753  | 915      | 1126 |
| <b>Males</b>         |      |          |      |      |          |      |        |          |      |      |          |      |      |          |      |
| Archery and Shooting | NA   | NA       | NA   | NA   | NA       | NA   | NA     | NA       | NA   | NA   | NA       | NA   | NA   | NA       | NA   |
| Athletics            | 407  | 602      | 757  | 590  | 733      | 859  | 717    | 823      | 929  | 788  | 914      | 1057 | 890  | 1044     | 1239 |
| Basketball           | 581  | 700      | 800  | 766  | 851      | 928  | 894    | 955      | 1016 | 983  | 1060     | 1144 | 1110 | 1210     | 1329 |
| Fencing              | NA   | NA       | NA   | NA   | NA       | NA   | NA     | NA       | NA   | NA   | NA       | NA   | NA   | NA       | NA   |
| Gymnastics           | NA   | NA       | NA   | NA   | NA       | NA   | NA     | NA       | NA   | NA   | NA       | NA   | NA   | NA       | NA   |
| Handball             | 587  | 716      | 824  | 769  | 861      | 944  | 895    | 961      | 1028 | 979  | 1062     | 1155 | 1100 | 1207     | 1336 |
| Hockey Rink          | NA   | NA       | NA   | NA   | NA       | NA   | NA     | NA       | NA   | NA   | NA       | NA   | NA   | NA       | NA   |
| Korfball             | NA   | NA       | NA   | NA   | NA       | NA   | NA     | NA       | NA   | NA   | NA       | NA   | NA   | NA       | NA   |
| Modern Pentathlon    | NA   | NA       | NA   | NA   | NA       | NA   | NA     | NA       | NA   | NA   | NA       | NA   | NA   | NA       | NA   |
| Motorsport           | NA   | NA       | NA   | NA   | NA       | NA   | NA     | NA       | NA   | NA   | NA       | NA   | NA   | NA       | NA   |
| Other combat sports  | 406  | 583      | 723  | 581  | 709      | 822  | 702    | 797      | 891  | 771  | 884      | 1013 | 870  | 1010     | 1187 |
| Rowing               | NA   | NA       | NA   | NA   | NA       | NA   | NA     | NA       | NA   | NA   | NA       | NA   | NA   | NA       | NA   |
| Rugby                | 582  | 698      | 794  | 749  | 832      | 906  | 866    | 925      | 984  | 944  | 1018     | 1101 | 1056 | 1152     | 1268 |
| Sailing              | NA   | NA       | NA   | NA   | NA       | NA   | NA     | NA       | NA   | NA   | NA       | NA   | NA   | NA       | NA   |
| Soccer               | 553  | 672      | 769  | 704  | 789      | 866  | 809    | 871      | 934  | 876  | 953      | 1039 | 973  | 1071     | 1190 |
| Surf                 | NA   | NA       | NA   | NA   | NA       | NA   | NA     | NA       | NA   | NA   | NA       | NA   | NA   | NA       | NA   |
| Swimming             | 361  | 482      | 582  | 533  | 618      | 695  | 652    | 713      | 774  | 731  | 808      | 894  | 845  | 945      | 1065 |
| Tennis               | 321  | 494      | 631  | 484  | 610      | 721  | 597    | 690      | 784  | 660  | 771      | 897  | 750  | 887      | 1060 |
| Triathlon            | 372  | 455      | 523  | 491  | 550      | 603  | 573    | 615      | 658  | 628  | 681      | 740  | 707  | 776      | 859  |
| Volleyball           | 642  | 829      | 979  | 842  | 977      | 1098 | 981    | 1081     | 1180 | 1064 | 1184     | 1320 | 1183 | 1333     | 1520 |
| Wrestling and Judo   | 543  | 651      | 742  | 709  | 786      | 856  | 825    | 880      | 936  | 904  | 974      | 1052 | 1019 | 1110     | 1218 |

NA: data not presented for n &lt; 8.

Table 21 – Trunk fat mass (kg) percentiles by sport and sex

| Sport                | 0.05 |          |      | 0.25 |          |      | Median |          |      | 0.75 |          |       | 0.95  |          |       |
|----------------------|------|----------|------|------|----------|------|--------|----------|------|------|----------|-------|-------|----------|-------|
|                      | Low  | Estimate | High | Low  | Estimate | High | Low    | Estimate | High | Low  | Estimate | High  | Low   | Estimate | High  |
| <b>Females</b>       |      |          |      |      |          |      |        |          |      |      |          |       |       |          |       |
| Archery and Shooting | NA   | NA       | NA   | NA   | NA       | NA   | NA     | NA       | NA   | NA   | NA       | NA    | NA    | NA       | NA    |
| Athletics            | 1.74 | 2.55     | 3.44 | 2.48 | 3.28     | 4.18 | 3.17   | 3.90     | 4.79 | 3.63 | 4.64     | 6.13  | 4.42  | 5.96     | 8.73  |
| Basketball           | 2.90 | 3.79     | 4.75 | 4.04 | 4.93     | 5.89 | 5.10   | 5.91     | 6.85 | 5.92 | 7.09     | 8.64  | 7.35  | 9.20     | 12.06 |
| Fencing              | NA   | NA       | NA   | NA   | NA       | NA   | NA     | NA       | NA   | NA   | NA       | NA    | NA    | NA       | NA    |
| Gymnastics           | 1.02 | 1.95     | 3.21 | 1.77 | 2.84     | 4.28 | 2.61   | 3.69     | 5.22 | 3.18 | 4.79     | 7.69  | 4.24  | 6.99     | 13.40 |
| Handball             | NA   | NA       | NA   | NA   | NA       | NA   | NA     | NA       | NA   | NA   | NA       | NA    | NA    | NA       | NA    |
| Hockey Rink          | NA   | NA       | NA   | NA   | NA       | NA   | NA     | NA       | NA   | NA   | NA       | NA    | NA    | NA       | NA    |
| Korfball             | NA   | NA       | NA   | NA   | NA       | NA   | NA     | NA       | NA   | NA   | NA       | NA    | NA    | NA       | NA    |
| Modern Pentathlon    | NA   | NA       | NA   | NA   | NA       | NA   | NA     | NA       | NA   | NA   | NA       | NA    | NA    | NA       | NA    |
| Motorsport           | NA   | NA       | NA   | NA   | NA       | NA   | NA     | NA       | NA   | NA   | NA       | NA    | NA    | NA       | NA    |
| Other combat sports  | NA   | NA       | NA   | NA   | NA       | NA   | NA     | NA       | NA   | NA   | NA       | NA    | NA    | NA       | NA    |
| Rowing               | NA   | NA       | NA   | NA   | NA       | NA   | NA     | NA       | NA   | NA   | NA       | NA    | NA    | NA       | NA    |
| Rugby                | NA   | NA       | NA   | NA   | NA       | NA   | NA     | NA       | NA   | NA   | NA       | NA    | NA    | NA       | NA    |
| Sailing              | NA   | NA       | NA   | NA   | NA       | NA   | NA     | NA       | NA   | NA   | NA       | NA    | NA    | NA       | NA    |
| Soccer               | NA   | NA       | NA   | NA   | NA       | NA   | NA     | NA       | NA   | NA   | NA       | NA    | NA    | NA       | NA    |
| Surf                 | NA   | NA       | NA   | NA   | NA       | NA   | NA     | NA       | NA   | NA   | NA       | NA    | NA    | NA       | NA    |
| Swimming             | 2.61 | 3.48     | 4.39 | 3.52 | 4.34     | 5.23 | 4.33   | 5.06     | 5.92 | 4.89 | 5.90     | 7.28  | 5.84  | 7.36     | 9.82  |
| Tennis               | NA   | NA       | NA   | NA   | NA       | NA   | NA     | NA       | NA   | NA   | NA       | NA    | NA    | NA       | NA    |
| Triathlon            | 1.04 | 2.20     | 3.87 | 1.90 | 3.27     | 5.22 | 2.90   | 4.31     | 6.43 | 3.57 | 5.69     | 9.79  | 4.81  | 8.47     | 17.91 |
| Volleyball           | 2.45 | 3.84     | 5.45 | 3.71 | 5.14     | 6.85 | 4.95   | 6.30     | 8.03 | 5.80 | 7.73     | 10.71 | 7.29  | 10.35    | 16.19 |
| Wrestling and Judo   | 1.72 | 2.76     | 3.99 | 2.64 | 3.72     | 5.04 | 3.55   | 4.59     | 5.92 | 4.18 | 5.65     | 7.98  | 5.28  | 7.63     | 12.26 |
| <b>Males</b>         |      |          |      |      |          |      |        |          |      |      |          |       |       |          |       |
| Archery and Shooting | NA   | NA       | NA   | NA   | NA       | NA   | NA     | NA       | NA   | NA   | NA       | NA    | NA    | NA       | NA    |
| Athletics            | 1.42 | 2.16     | 2.91 | 1.95 | 2.62     | 3.36 | 2.43   | 3.00     | 3.70 | 2.68 | 3.43     | 4.61  | 3.09  | 4.17     | 6.32  |
| Basketball           | 1.43 | 2.07     | 2.82 | 2.40 | 3.13     | 3.98 | 3.44   | 4.17     | 5.05 | 4.37 | 5.55     | 7.23  | 6.16  | 8.38     | 12.13 |
| Fencing              | NA   | NA       | NA   | NA   | NA       | NA   | NA     | NA       | NA   | NA   | NA       | NA    | NA    | NA       | NA    |
| Gymnastics           | NA   | NA       | NA   | NA   | NA       | NA   | NA     | NA       | NA   | NA   | NA       | NA    | NA    | NA       | NA    |
| Handball             | 1.66 | 2.59     | 3.70 | 2.90 | 3.98     | 5.27 | 4.28   | 5.37     | 6.73 | 5.47 | 7.24     | 9.93  | 7.79  | 11.14    | 17.37 |
| Hockey Rink          | NA   | NA       | NA   | NA   | NA       | NA   | NA     | NA       | NA   | NA   | NA       | NA    | NA    | NA       | NA    |
| Korfball             | NA   | NA       | NA   | NA   | NA       | NA   | NA     | NA       | NA   | NA   | NA       | NA    | NA    | NA       | NA    |
| Modern Pentathlon    | NA   | NA       | NA   | NA   | NA       | NA   | NA     | NA       | NA   | NA   | NA       | NA    | NA    | NA       | NA    |
| Motorsport           | NA   | NA       | NA   | NA   | NA       | NA   | NA     | NA       | NA   | NA   | NA       | NA    | NA    | NA       | NA    |
| Other combat sports  | 0.99 | 1.91     | 3.07 | 1.71 | 2.71     | 3.98 | 2.50   | 3.46     | 4.77 | 3.00 | 4.41     | 6.99  | 3.89  | 6.26     | 12.10 |
| Rowing               | NA   | NA       | NA   | NA   | NA       | NA   | NA     | NA       | NA   | NA   | NA       | NA    | NA    | NA       | NA    |
| Rugby                | 1.07 | 1.96     | 3.20 | 2.40 | 3.68     | 5.38 | 4.21   | 5.70     | 7.72 | 6.04 | 8.84     | 13.56 | 10.16 | 16.62    | 30.51 |
| Sailing              | NA   | NA       | NA   | NA   | NA       | NA   | NA     | NA       | NA   | NA   | NA       | NA    | NA    | NA       | NA    |
| Soccer               | 1.52 | 2.16     | 2.86 | 2.25 | 2.90     | 3.62 | 2.96   | 3.55     | 4.26 | 3.48 | 4.35     | 5.61  | 4.41  | 5.84     | 8.32  |
| Surf                 | NA   | NA       | NA   | NA   | NA       | NA   | NA     | NA       | NA   | NA   | NA       | NA    | NA    | NA       | NA    |
| Swimming             | 0.79 | 1.31     | 1.97 | 1.51 | 2.16     | 2.97 | 2.37   | 3.05     | 3.94 | 3.14 | 4.32     | 6.17  | 4.73  | 7.11     | 11.79 |
| Tennis               | 0.88 | 2.20     | 4.18 | 1.83 | 3.43     | 5.77 | 3.02   | 4.67     | 7.23 | 3.78 | 6.36     | 11.97 | 5.23  | 9.92     | 24.69 |
| Triathlon            | 1.88 | 2.29     | 2.70 | 2.41 | 2.77     | 3.15 | 2.85   | 3.17     | 3.52 | 3.18 | 3.62     | 4.17  | 3.72  | 4.37     | 5.33  |
| Volleyball           | 1.68 | 2.94     | 4.46 | 2.82 | 4.17     | 5.83 | 4.03   | 5.32     | 7.02 | 4.85 | 6.78     | 10.05 | 6.34  | 9.62     | 16.83 |
| Wrestling and Judo   | 1.14 | 1.61     | 2.15 | 1.84 | 2.36     | 2.95 | 2.57   | 3.08     | 3.68 | 3.21 | 4.01     | 5.15  | 4.41  | 5.88     | 8.32  |

NA: data not presented for n &lt; 8.

Table 22 – Trunk fat mass (%) percentiles by sport and sex

| Sport                | 0.05 |          |       | 0.25  |          |       | Median |          |       | 0.75  |          |       | 0.95  |          |       |
|----------------------|------|----------|-------|-------|----------|-------|--------|----------|-------|-------|----------|-------|-------|----------|-------|
|                      | Low  | Estimate | High  | Low   | Estimate | High  | Low    | Estimate | High  | Low   | Estimate | High  | Low   | Estimate | High  |
| <b>Females</b>       |      |          |       |       |          |       |        |          |       |       |          |       |       |          |       |
| Archery and Shooting | NA   | NA       | NA    | NA    | NA       | NA    | NA     | NA       | NA    | NA    | NA       | NA    | NA    | NA       | NA    |
| Athletics            | 4.56 | 9.23     | 12.70 | 9.28  | 12.49    | 15.21 | 12.57  | 14.76    | 16.95 | 14.31 | 17.03    | 20.23 | 16.82 | 20.29    | 24.96 |
| Basketball           | 9.10 | 13.07    | 16.25 | 14.48 | 17.23    | 19.65 | 18.22  | 20.12    | 22.02 | 20.59 | 23.01    | 25.76 | 23.99 | 27.17    | 31.14 |
| Fencing              | NA   | NA       | NA    | NA    | NA       | NA    | NA     | NA       | NA    | NA    | NA       | NA    | NA    | NA       | NA    |
| Gymnastics           | 0.12 | 8.30     | 14.16 | 7.72  | 13.27    | 17.87 | 13.01  | 16.72    | 20.44 | 15.58 | 20.18    | 25.72 | 19.28 | 25.14    | 33.32 |
| Handball             | NA   | NA       | NA    | NA    | NA       | NA    | NA     | NA       | NA    | NA    | NA       | NA    | NA    | NA       | NA    |
| Hockey Rink          | NA   | NA       | NA    | NA    | NA       | NA    | NA     | NA       | NA    | NA    | NA       | NA    | NA    | NA       | NA    |
| Korfball             | NA   | NA       | NA    | NA    | NA       | NA    | NA     | NA       | NA    | NA    | NA       | NA    | NA    | NA       | NA    |
| Modern Pentathlon    | NA   | NA       | NA    | NA    | NA       | NA    | NA     | NA       | NA    | NA    | NA       | NA    | NA    | NA       | NA    |
| Motorsport           | NA   | NA       | NA    | NA    | NA       | NA    | NA     | NA       | NA    | NA    | NA       | NA    | NA    | NA       | NA    |
| Other combat sports  | NA   | NA       | NA    | NA    | NA       | NA    | NA     | NA       | NA    | NA    | NA       | NA    | NA    | NA       | NA    |
| Rowing               | NA   | NA       | NA    | NA    | NA       | NA    | NA     | NA       | NA    | NA    | NA       | NA    | NA    | NA       | NA    |
| Rugby                | NA   | NA       | NA    | NA    | NA       | NA    | NA     | NA       | NA    | NA    | NA       | NA    | NA    | NA       | NA    |
| Sailing              | NA   | NA       | NA    | NA    | NA       | NA    | NA     | NA       | NA    | NA    | NA       | NA    | NA    | NA       | NA    |
| Soccer               | NA   | NA       | NA    | NA    | NA       | NA    | NA     | NA       | NA    | NA    | NA       | NA    | NA    | NA       | NA    |
| Surf                 | NA   | NA       | NA    | NA    | NA       | NA    | NA     | NA       | NA    | NA    | NA       | NA    | NA    | NA       | NA    |
| Swimming             | 9.54 | 13.42    | 16.41 | 13.88 | 16.57    | 18.90 | 16.89  | 18.76    | 20.63 | 18.63 | 20.96    | 23.65 | 21.12 | 24.11    | 27.98 |
| Tennis               | NA   | NA       | NA    | NA    | NA       | NA    | NA     | NA       | NA    | NA    | NA       | NA    | NA    | NA       | NA    |
| Triathlon            | 0.00 | 7.83     | 15.01 | 6.59  | 13.51    | 19.17 | 12.86  | 17.46    | 22.06 | 15.75 | 21.41    | 28.33 | 19.91 | 27.10    | 37.35 |
| Volleyball           | 8.62 | 14.47    | 18.85 | 14.50 | 18.54    | 21.97 | 18.58  | 21.36    | 24.15 | 20.75 | 24.19    | 28.23 | 23.88 | 28.26    | 34.11 |
| Wrestling and Judo   | 2.54 | 9.56     | 14.71 | 9.55  | 14.33    | 18.34 | 14.43  | 17.64    | 20.86 | 16.95 | 20.96    | 25.73 | 20.57 | 25.72    | 32.74 |
| <b>Males</b>         |      |          |       |       |          |       |        |          |       |       |          |       |       |          |       |
| Archery and Shooting | NA   | NA       | NA    | NA    | NA       | NA    | NA     | NA       | NA    | NA    | NA       | NA    | NA    | NA       | NA    |
| Athletics            | 3.87 | 7.09     | 9.20  | 6.55  | 8.66     | 10.31 | 8.42   | 9.75     | 11.09 | 9.19  | 10.84    | 12.95 | 10.31 | 12.41    | 15.64 |
| Basketball           | 1.46 | 5.10     | 8.00  | 6.95  | 9.39     | 11.53 | 10.77  | 12.38    | 13.99 | 13.23 | 15.37    | 17.81 | 16.76 | 19.66    | 23.30 |
| Fencing              | NA   | NA       | NA    | NA    | NA       | NA    | NA     | NA       | NA    | NA    | NA       | NA    | NA    | NA       | NA    |
| Gymnastics           | NA   | NA       | NA    | NA    | NA       | NA    | NA     | NA       | NA    | NA    | NA       | NA    | NA    | NA       | NA    |
| Handball             | 0.13 | 5.67     | 9.96  | 7.67  | 11.36    | 14.54 | 12.91  | 15.31    | 17.72 | 16.09 | 19.27    | 22.96 | 20.67 | 24.96    | 30.50 |
| Hockey Rink          | NA   | NA       | NA    | NA    | NA       | NA    | NA     | NA       | NA    | NA    | NA       | NA    | NA    | NA       | NA    |
| Korfball             | NA   | NA       | NA    | NA    | NA       | NA    | NA     | NA       | NA    | NA    | NA       | NA    | NA    | NA       | NA    |
| Modern Pentathlon    | NA   | NA       | NA    | NA    | NA       | NA    | NA     | NA       | NA    | NA    | NA       | NA    | NA    | NA       | NA    |
| Motorsport           | NA   | NA       | NA    | NA    | NA       | NA    | NA     | NA       | NA    | NA    | NA       | NA    | NA    | NA       | NA    |
| Other combat sports  | 0.00 | 5.78     | 9.95  | 5.17  | 9.27     | 12.46 | 9.20   | 11.70    | 14.20 | 10.94 | 14.13    | 18.23 | 13.44 | 17.62    | 24.03 |
| Rowing               | NA   | NA       | NA    | NA    | NA       | NA    | NA     | NA       | NA    | NA    | NA       | NA    | NA    | NA       | NA    |
| Rugby                | 0.00 | 3.95     | 9.19  | 6.74  | 11.21    | 15.05 | 13.37  | 16.26    | 19.13 | 17.45 | 21.30    | 25.76 | 23.31 | 28.56    | 35.31 |
| Sailing              | NA   | NA       | NA    | NA    | NA       | NA    | NA     | NA       | NA    | NA    | NA       | NA    | NA    | NA       | NA    |
| Soccer               | 3.62 | 6.68     | 9.01  | 7.31  | 9.37     | 11.13 | 9.87   | 11.23    | 12.60 | 11.34 | 13.10    | 15.16 | 13.46 | 15.79    | 18.85 |
| Surf                 | NA   | NA       | NA    | NA    | NA       | NA    | NA     | NA       | NA    | NA    | NA       | NA    | NA    | NA       | NA    |
| Swimming             | 0.00 | 3.63     | 6.60  | 5.02  | 7.58     | 9.78  | 8.66   | 10.32    | 11.98 | 10.86 | 13.06    | 15.62 | 14.04 | 17.01    | 20.86 |
| Tennis               | 0.00 | 6.29     | 13.44 | 4.63  | 11.87    | 17.33 | 11.45  | 15.75    | 20.04 | 14.16 | 19.63    | 26.86 | 18.06 | 25.21    | 36.68 |
| Triathlon            | 5.45 | 7.33     | 8.82  | 8.00  | 9.29     | 10.41 | 9.77   | 10.65    | 11.52 | 10.88 | 12.01    | 13.30 | 12.48 | 13.96    | 15.85 |
| Volleyball           | 1.99 | 7.68     | 11.65 | 7.61  | 11.35    | 14.39 | 11.51  | 13.91    | 16.30 | 13.42 | 16.46    | 20.21 | 16.17 | 20.14    | 25.82 |
| Wrestling and Judo   | 1.71 | 4.52     | 6.75  | 5.90  | 7.79     | 9.44  | 8.81   | 10.06    | 11.31 | 10.68 | 12.33    | 14.22 | 13.37 | 15.60    | 18.41 |

NA: data not presented for n &lt; 8.

Table 23 – Trunk fat-free mass (kg) percentiles by sport and sex

| Sport                | 0.05  |          |       | 0.25  |          |       | Median |          |       | 0.75  |          |       | 0.95  |          |       |
|----------------------|-------|----------|-------|-------|----------|-------|--------|----------|-------|-------|----------|-------|-------|----------|-------|
|                      | Low   | Estimate | High  | Low   | Estimate | High  | Low    | Estimate | High  | Low   | Estimate | High  | Low   | Estimate | High  |
| <b>Females</b>       |       |          |       |       |          |       |        |          |       |       |          |       |       |          |       |
| Archery and Shooting | NA    | NA       | NA    | NA    | NA       | NA    | NA     | NA       | NA    | NA    | NA       | NA    | NA    | NA       | NA    |
| Athletics            | 17.13 | 18.43    | 19.75 | 19.71 | 21.01    | 22.33 | 21.51  | 22.81    | 24.12 | 23.30 | 24.60    | 25.92 | 25.87 | 27.18    | 28.50 |
| Basketball           | 18.71 | 19.61    | 20.50 | 21.30 | 22.18    | 23.07 | 23.09  | 23.98    | 24.86 | 24.88 | 25.77    | 26.66 | 27.46 | 28.35    | 29.24 |
| Fencing              | NA    | NA       | NA    | NA    | NA       | NA    | NA     | NA       | NA    | NA    | NA       | NA    | NA    | NA       | NA    |
| Gymnastics           | 13.20 | 14.71    | 16.23 | 15.79 | 17.28    | 18.81 | 17.58  | 19.08    | 20.60 | 19.38 | 20.87    | 22.39 | 21.95 | 23.45    | 24.98 |
| Handball             | NA    | NA       | NA    | NA    | NA       | NA    | NA     | NA       | NA    | NA    | NA       | NA    | NA    | NA       | NA    |
| Hockey Rink          | NA    | NA       | NA    | NA    | NA       | NA    | NA     | NA       | NA    | NA    | NA       | NA    | NA    | NA       | NA    |
| Korfball             | NA    | NA       | NA    | NA    | NA       | NA    | NA     | NA       | NA    | NA    | NA       | NA    | NA    | NA       | NA    |
| Modern Pentathlon    | NA    | NA       | NA    | NA    | NA       | NA    | NA     | NA       | NA    | NA    | NA       | NA    | NA    | NA       | NA    |
| Motorsport           | NA    | NA       | NA    | NA    | NA       | NA    | NA     | NA       | NA    | NA    | NA       | NA    | NA    | NA       | NA    |
| Other combat sports  | NA    | NA       | NA    | NA    | NA       | NA    | NA     | NA       | NA    | NA    | NA       | NA    | NA    | NA       | NA    |
| Rowing               | NA    | NA       | NA    | NA    | NA       | NA    | NA     | NA       | NA    | NA    | NA       | NA    | NA    | NA       | NA    |
| Rugby                | NA    | NA       | NA    | NA    | NA       | NA    | NA     | NA       | NA    | NA    | NA       | NA    | NA    | NA       | NA    |
| Sailing              | NA    | NA       | NA    | NA    | NA       | NA    | NA     | NA       | NA    | NA    | NA       | NA    | NA    | NA       | NA    |
| Soccer               | NA    | NA       | NA    | NA    | NA       | NA    | NA     | NA       | NA    | NA    | NA       | NA    | NA    | NA       | NA    |
| Surf                 | NA    | NA       | NA    | NA    | NA       | NA    | NA     | NA       | NA    | NA    | NA       | NA    | NA    | NA       | NA    |
| Swimming             | 16.54 | 17.67    | 18.78 | 19.12 | 20.25    | 21.36 | 20.92  | 22.04    | 23.15 | 22.71 | 23.83    | 24.95 | 25.28 | 26.41    | 27.53 |
| Tennis               | NA    | NA       | NA    | NA    | NA       | NA    | NA     | NA       | NA    | NA    | NA       | NA    | NA    | NA       | NA    |
| Triathlon            | 15.13 | 17.12    | 18.44 | 17.72 | 19.70    | 21.01 | 19.51  | 21.49    | 22.80 | 21.30 | 23.29    | 24.60 | 23.88 | 25.87    | 27.18 |
| Volleyball           | 17.76 | 19.05    | 20.38 | 20.34 | 21.63    | 22.96 | 22.14  | 23.43    | 24.75 | 23.93 | 25.22    | 26.54 | 26.51 | 27.80    | 29.13 |
| Wrestling and Judo   | 16.19 | 17.55    | 18.89 | 18.77 | 20.13    | 21.46 | 20.57  | 21.92    | 23.26 | 22.36 | 23.71    | 25.05 | 24.93 | 26.29    | 27.63 |
| <b>Males</b>         |       |          |       |       |          |       |        |          |       |       |          |       |       |          |       |
| Archery and Shooting | NA    | NA       | NA    | NA    | NA       | NA    | NA     | NA       | NA    | NA    | NA       | NA    | NA    | NA       | NA    |
| Athletics            | 19.77 | 24.20    | 27.64 | 23.68 | 26.91    | 29.73 | 26.41  | 28.79    | 31.18 | 27.86 | 30.68    | 33.90 | 29.95 | 33.39    | 37.82 |
| Basketball           | 22.75 | 25.74    | 28.24 | 27.24 | 29.37    | 31.31 | 30.36  | 31.90    | 33.44 | 32.49 | 34.42    | 36.56 | 35.55 | 38.06    | 41.05 |
| Fencing              | NA    | NA       | NA    | NA    | NA       | NA    | NA     | NA       | NA    | NA    | NA       | NA    | NA    | NA       | NA    |
| Gymnastics           | NA    | NA       | NA    | NA    | NA       | NA    | NA     | NA       | NA    | NA    | NA       | NA    | NA    | NA       | NA    |
| Handball             | 22.83 | 26.09    | 28.79 | 27.25 | 29.59    | 31.70 | 30.33  | 32.03    | 33.72 | 32.35 | 34.46    | 36.80 | 35.26 | 37.96    | 41.23 |
| Hockey Rink          | NA    | NA       | NA    | NA    | NA       | NA    | NA     | NA       | NA    | NA    | NA       | NA    | NA    | NA       | NA    |
| Korfball             | NA    | NA       | NA    | NA    | NA       | NA    | NA     | NA       | NA    | NA    | NA       | NA    | NA    | NA       | NA    |
| Modern Pentathlon    | NA    | NA       | NA    | NA    | NA       | NA    | NA     | NA       | NA    | NA    | NA       | NA    | NA    | NA       | NA    |
| Motorsport           | NA    | NA       | NA    | NA    | NA       | NA    | NA     | NA       | NA    | NA    | NA       | NA    | NA    | NA       | NA    |
| Other combat sports  | 17.19 | 22.24    | 26.17 | 21.98 | 25.62    | 28.79 | 25.31  | 27.96    | 30.61 | 27.13 | 30.31    | 33.94 | 29.75 | 33.68    | 38.73 |
| Rowing               | NA    | NA       | NA    | NA    | NA       | NA    | NA     | NA       | NA    | NA    | NA       | NA    | NA    | NA       | NA    |
| Rugby                | 22.31 | 26.06    | 29.16 | 27.62 | 30.28    | 32.69 | 31.31  | 33.22    | 35.14 | 33.76 | 36.16    | 38.83 | 37.28 | 40.39    | 44.14 |
| Sailing              | NA    | NA       | NA    | NA    | NA       | NA    | NA     | NA       | NA    | NA    | NA       | NA    | NA    | NA       | NA    |
| Soccer               | 21.32 | 24.38    | 26.88 | 25.08 | 27.27    | 29.24 | 27.69  | 29.28    | 30.89 | 29.33 | 31.29    | 33.50 | 31.69 | 34.18    | 37.25 |
| Surf                 | NA    | NA       | NA    | NA    | NA       | NA    | NA     | NA       | NA    | NA    | NA       | NA    | NA    | NA       | NA    |
| Swimming             | 20.34 | 23.56    | 26.21 | 24.72 | 27.02    | 29.08 | 27.76  | 29.42    | 31.08 | 29.76 | 31.83    | 34.12 | 32.63 | 35.29    | 38.50 |
| Tennis               | 16.14 | 21.65    | 25.90 | 21.09 | 25.07    | 28.54 | 24.53  | 27.45    | 30.37 | 26.36 | 29.83    | 33.81 | 29.00 | 33.26    | 38.77 |
| Triathlon            | 21.35 | 23.43    | 25.16 | 24.18 | 25.68    | 27.04 | 26.15  | 27.24    | 28.34 | 27.45 | 28.81    | 30.31 | 29.33 | 31.06    | 33.14 |
| Volleyball           | 25.10 | 29.47    | 32.94 | 29.57 | 32.73    | 35.52 | 32.68  | 35.00    | 37.31 | 34.47 | 37.26    | 40.42 | 37.05 | 40.52    | 44.89 |
| Wrestling and Judo   | 20.44 | 23.36    | 25.80 | 24.81 | 26.88    | 28.77 | 27.84  | 29.34    | 30.83 | 29.90 | 31.79    | 33.87 | 32.87 | 35.32    | 38.23 |

NA: data not presented for n &lt; 8.



Table 24 – Trunk lean soft tissue (kg) percentiles by sport and sex

| Sport                | 0.05  |          |       | 0.25  |          |       | Median |          |       | 0.75  |          |       | 0.95  |          |       |
|----------------------|-------|----------|-------|-------|----------|-------|--------|----------|-------|-------|----------|-------|-------|----------|-------|
|                      | Low   | Estimate | High  | Low   | Estimate | High  | Low    | Estimate | High  | Low   | Estimate | High  | Low   | Estimate | High  |
| <b>Females</b>       |       |          |       |       |          |       |        |          |       |       |          |       |       |          |       |
| Archery and Shooting | NA    | NA       | NA    | NA    | NA       | NA    | NA     | NA       | NA    | NA    | NA       | NA    | NA    | NA       | NA    |
| Athletics            | 16.30 | 17.59    | 18.87 | 18.81 | 20.08    | 21.35 | 20.54  | 21.82    | 23.07 | 22.27 | 23.55    | 24.81 | 24.75 | 26.04    | 27.31 |
| Basketball           | 18.00 | 18.88    | 19.75 | 20.50 | 21.37    | 22.24 | 22.24  | 23.11    | 23.96 | 23.96 | 24.84    | 25.70 | 26.44 | 27.33    | 28.20 |
| Fencing              | NA    | NA       | NA    | NA    | NA       | NA    | NA     | NA       | NA    | NA    | NA       | NA    | NA    | NA       | NA    |
| Gymnastics           | 12.41 | 13.88    | 15.36 | 14.91 | 16.37    | 17.84 | 16.65  | 18.10    | 19.57 | 18.37 | 19.83    | 21.30 | 20.85 | 22.32    | 23.80 |
| Handball             | NA    | NA       | NA    | NA    | NA       | NA    | NA     | NA       | NA    | NA    | NA       | NA    | NA    | NA       | NA    |
| Hockey Rink          | NA    | NA       | NA    | NA    | NA       | NA    | NA     | NA       | NA    | NA    | NA       | NA    | NA    | NA       | NA    |
| Korfball             | NA    | NA       | NA    | NA    | NA       | NA    | NA     | NA       | NA    | NA    | NA       | NA    | NA    | NA       | NA    |
| Modern Pentathlon    | NA    | NA       | NA    | NA    | NA       | NA    | NA     | NA       | NA    | NA    | NA       | NA    | NA    | NA       | NA    |
| Motorsport           | NA    | NA       | NA    | NA    | NA       | NA    | NA     | NA       | NA    | NA    | NA       | NA    | NA    | NA       | NA    |
| Other combat sports  | NA    | NA       | NA    | NA    | NA       | NA    | NA     | NA       | NA    | NA    | NA       | NA    | NA    | NA       | NA    |
| Rowing               | NA    | NA       | NA    | NA    | NA       | NA    | NA     | NA       | NA    | NA    | NA       | NA    | NA    | NA       | NA    |
| Rugby                | NA    | NA       | NA    | NA    | NA       | NA    | NA     | NA       | NA    | NA    | NA       | NA    | NA    | NA       | NA    |
| Sailing              | NA    | NA       | NA    | NA    | NA       | NA    | NA     | NA       | NA    | NA    | NA       | NA    | NA    | NA       | NA    |
| Soccer               | NA    | NA       | NA    | NA    | NA       | NA    | NA     | NA       | NA    | NA    | NA       | NA    | NA    | NA       | NA    |
| Surf                 | NA    | NA       | NA    | NA    | NA       | NA    | NA     | NA       | NA    | NA    | NA       | NA    | NA    | NA       | NA    |
| Swimming             | 15.90 | 16.99    | 18.09 | 18.40 | 19.49    | 20.57 | 20.14  | 21.22    | 22.30 | 21.86 | 22.95    | 24.04 | 24.34 | 25.44    | 26.54 |
| Tennis               | NA    | NA       | NA    | NA    | NA       | NA    | NA     | NA       | NA    | NA    | NA       | NA    | NA    | NA       | NA    |
| Triathlon            | 14.35 | 16.01    | 17.58 | 16.85 | 18.50    | 20.06 | 18.59  | 20.23    | 21.79 | 20.32 | 21.96    | 23.53 | 22.80 | 24.45    | 26.03 |
| Volleyball           | 16.94 | 18.22    | 19.50 | 19.44 | 20.71    | 21.98 | 21.18  | 22.44    | 23.70 | 22.90 | 24.17    | 25.44 | 25.38 | 26.66    | 27.94 |
| Wrestling and Judo   | 15.35 | 16.69    | 18.01 | 17.85 | 19.18    | 20.49 | 19.59  | 20.91    | 22.21 | 21.32 | 22.64    | 23.95 | 23.80 | 25.13    | 26.45 |
| <b>Males</b>         |       |          |       |       |          |       |        |          |       |       |          |       |       |          |       |
| Archery and Shooting | NA    | NA       | NA    | NA    | NA       | NA    | NA     | NA       | NA    | NA    | NA       | NA    | NA    | NA       | NA    |
| Athletics            | 19.59 | 23.91    | 27.27 | 23.41 | 26.56    | 29.32 | 26.07  | 28.41    | 30.74 | 27.49 | 30.25    | 33.40 | 29.54 | 32.91    | 37.23 |
| Basketball           | 22.35 | 25.20    | 27.60 | 26.61 | 28.65    | 30.51 | 29.57  | 31.05    | 32.53 | 31.60 | 33.45    | 35.49 | 34.51 | 36.90    | 39.75 |
| Fencing              | NA    | NA       | NA    | NA    | NA       | NA    | NA     | NA       | NA    | NA    | NA       | NA    | NA    | NA       | NA    |
| Gymnastics           | NA    | NA       | NA    | NA    | NA       | NA    | NA     | NA       | NA    | NA    | NA       | NA    | NA    | NA       | NA    |
| Handball             | 22.54 | 25.61    | 28.15 | 26.71 | 28.91    | 30.89 | 29.62  | 31.21    | 32.80 | 31.52 | 33.50    | 35.70 | 34.27 | 36.81    | 39.88 |
| Hockey Rink          | NA    | NA       | NA    | NA    | NA       | NA    | NA     | NA       | NA    | NA    | NA       | NA    | NA    | NA       | NA    |
| Korfball             | NA    | NA       | NA    | NA    | NA       | NA    | NA     | NA       | NA    | NA    | NA       | NA    | NA    | NA       | NA    |
| Modern Pentathlon    | NA    | NA       | NA    | NA    | NA       | NA    | NA     | NA       | NA    | NA    | NA       | NA    | NA    | NA       | NA    |
| Motorsport           | NA    | NA       | NA    | NA    | NA       | NA    | NA     | NA       | NA    | NA    | NA       | NA    | NA    | NA       | NA    |
| Other combat sports  | 16.90 | 21.88    | 25.78 | 21.62 | 25.22    | 28.37 | 24.90  | 27.54    | 30.17 | 26.71 | 29.86    | 33.45 | 29.30 | 33.19    | 38.18 |
| Rowing               | NA    | NA       | NA    | NA    | NA       | NA    | NA     | NA       | NA    | NA    | NA       | NA    | NA    | NA       | NA    |
| Rugby                | 22.00 | 25.59    | 28.57 | 27.06 | 29.63    | 31.94 | 30.58  | 32.43    | 34.28 | 32.92 | 35.23    | 37.79 | 36.29 | 39.26    | 42.85 |
| Sailing              | NA    | NA       | NA    | NA    | NA       | NA    | NA     | NA       | NA    | NA    | NA       | NA    | NA    | NA       | NA    |
| Soccer               | 20.88 | 23.85    | 26.26 | 24.51 | 26.64    | 28.55 | 27.03  | 28.59    | 30.14 | 28.62 | 30.53    | 32.66 | 30.91 | 33.33    | 36.29 |
| Surf                 | NA    | NA       | NA    | NA    | NA       | NA    | NA     | NA       | NA    | NA    | NA       | NA    | NA    | NA       | NA    |
| Swimming             | 20.03 | 23.14    | 25.72 | 24.29 | 26.51    | 28.51 | 27.24  | 28.85    | 30.45 | 29.19 | 31.19    | 33.41 | 31.98 | 34.55    | 37.67 |
| Tennis               | 15.84 | 21.36    | 25.63 | 20.81 | 24.80    | 28.28 | 24.27  | 27.20    | 30.12 | 26.11 | 29.59    | 33.58 | 28.76 | 33.03    | 38.55 |
| Triathlon            | 20.81 | 22.90    | 24.64 | 23.68 | 25.18    | 26.54 | 25.67  | 26.76    | 27.86 | 26.99 | 28.35    | 29.85 | 28.89 | 30.63    | 32.71 |
| Volleyball           | 25.55 | 29.40    | 32.45 | 29.44 | 32.23    | 34.70 | 32.14  | 34.20    | 36.27 | 33.71 | 36.18    | 38.97 | 35.96 | 39.01    | 42.86 |
| Wrestling and Judo   | 19.91 | 22.75    | 25.13 | 24.16 | 26.18    | 28.02 | 27.11  | 28.57    | 30.03 | 29.12 | 30.96    | 32.98 | 32.01 | 34.39    | 37.23 |

NA: data not presented for n &lt; 8.
